# Supplementary material for: Transcriptome Profiling Reveals Differential Effect of Interleukin-17A Upon Influenza Virus Infection in Human Cells
Source: Front Microbiol. 2019 Oct 10;10:2344. doi: 10.3389/fmicb.2019.02344 (PMC6798183; doi:10.3389/fmicb.2019.02344)
Supplement: TABLE S8 — RNA-seq data for PR8 virus infected A549 cells. [file Table_8.XLS]

geneID	geneLength	A549_Control-Expression	A549_PR8-Expression	A549_Control-RPKM	A549_PR8-RPKM	log2 Ratio(A549_PR8/A549_Control)	Up-Down-Regulation(A549_PR8/A549_Control)	P-value	FDR	Symbol	Description	GO Component	GO Function	GO Process	Blast nr
26855	138	0	25	0.001	7.37893825674653	12.8491975288714	Up	9.21826e-10	4.58605842688414e-09	RNU2-2	3	-	-	-	gi|24940209|emb|CAA24954.2|/1.14448e-13/unnamed protein product [Xenopus laevis]
677775	278	0	27	0.001	3.95596027980397	11.9498122253148	Up	1.763868e-10	9.29814922169249e-10	SCARNA5	2	-	-	-	-
692148	330	0	26	0.001	3.20916732911595	11.6479832997702	Up	4.03234e-10	2.07071486037736e-09	SCARNA10	1	-	-	-	-
219537	1649	0	101	0.001	2.49478814851506	11.2847015951892	Up	4.71726e-37	7.75585935501859e-36	SMTNL1	2	GO:0030017//sarcomere	-	GO:0044057;GO:0050880//regulation of blood vessel size;GO:0050896//response to stimulus	gi|303304956|ref|NP_001099035.2|/1.24699e-177/smoothelin-like protein 1 [Homo sapiens]
282617	595	0	21	0.001	1.43759079449085	10.4894373604583	Up	2.51776e-08	1.11689298294885e-07	IL28B	2	GO:0044421//extracellular region part	GO:0005102//receptor binding	GO:0051707//response to other organism	gi|25527105|gb|AAN28264.1|/8.66977e-101/interleukin 28B [Homo sapiens]
389383	422	0	11	0.001	1.06172779845889	10.052198225805	Up	9.81592e-05	0.000296539345491803	CLPSL2	2	-	GO:0030234//enzyme regulator activity	GO:0006629//lipid metabolic process;GO:0032501//multicellular organismal process	gi|123251696|emb|CAI21638.2|/4.79225e-60/chromosome 6 open reading frame 126 [Homo sapiens]
397	1216	0	17	0.001	0.569440432576558	9.15340112368164	Up	6.87672e-07	2.65045868235294e-06	ARHGDIB	4	GO:0031410//cytoplasmic vesicle;GO:0043232	GO:0005092//GDP-dissociation inhibitor activity;GO:0008047//enzyme activator activity	GO:0002376//immune system process;GO:0007010//cytoskeleton organization;GO:0007155//cell adhesion;GO:0007265//Ras protein signal transduction;GO:0009966//regulation of signal transduction;GO:0032501//multicellular organismal process	gi|56676393|ref|NP_001166.3|/9.0135e-108/rho GDP-dissociation inhibitor 2 [Homo sapiens]
54979	785	0	10	0.001	0.518875658308801	9.01924504698326	Up	0.0002244	0.000642788277202073	HRASLS2	1	GO:0005737//cytoplasm;GO:0016020//membrane	GO:0016787//hydrolase activity	-	gi|8923526|ref|NP_060348.1|/7.26344e-58/HRAS-like suppressor 2 [Homo sapiens]
1109	1192	0	15	0.001	0.512563831928367	9.00158787102124	Up	3.5939e-06	1.29069599878197e-05	AKR1C4	3	GO:0044444//cytoplasmic part	GO:0008028//monocarboxylic acid transmembrane transporter activity;GO:0016628//oxidoreductase activity, acting on the CH-CH group of donors, NAD or NADP as acceptor;GO:0047023//androsterone dehydrogenase activity	GO:0006694//steroid biosynthetic process;GO:0015718//monocarboxylic acid transport	gi|325652083|ref|NP_001809.3|/0/aldo-keto reductase family 1 member C4 [Homo sapiens]
64108	1027	0	12	0.001	0.475930740143029	8.89460783027785	Up	4.29378e-05	0.000135645110678571	RTP4	2	GO:0031224//intrinsic to membrane;GO:0044424//intracellular part	GO:0005488//binding	GO:0006605//protein targeting;GO:0050912//detection of chemical stimulus involved in sensory perception of taste	gi|54607029|ref|NP_071430.2|/5.16381e-135/receptor-transporting protein 4 [Homo sapiens]
3627	1227	0	12	0.001	0.398354417381329	8.63790876293313	Up	4.29378e-05	0.000135596683291682	CXCL10	3	GO:0044421//extracellular region part	GO:0005125//cytokine activity;GO:0019887//protein kinase regulator activity	GO:0002376//immune system process;GO:0003013;GO:0006952//defense response;GO:0007154//cell communication;GO:0007165//signal transduction;GO:0008283//cell proliferation;GO:0042221//response to chemical stimulus;GO:0048513//organ development	gi|149999382|ref|NP_001556.2|/2.80939e-48/C-X-C motif chemokine 10 precursor [Homo sapiens]
3596	1282	0	11	0.001	0.3494923018328	8.44911686789344	Up	9.81592e-05	0.000296640657191664	IL13	2	GO:0000267//cell fraction;GO:0044421//extracellular region part	GO:0005126//cytokine receptor binding	GO:0001818//negative regulation of cytokine production;GO:0002237//response to molecule of bacterial origin;GO:0002377//immunoglobulin production;GO:0006952//defense response;GO:0007154//cell communication;GO:0009605//response to external stimulus;GO:0014070//response to organic cyclic compound;GO:0015992//proton transport;GO:0023052//signaling;GO:0030888//regulation of B cell proliferation;GO:00…	gi|116138167|gb|AAH96141.2|/2.67936e-73/Interleukin 13 [Homo sapiens]
123346	1210	0	10	0.001	0.336625943613561	8.39500255860029	Up	0.0002244	0.00064268421563866	HIGD2B	1	GO:0016020//membrane;GO:0043231//intracellular membrane-bounded organelle	-	-	gi|119598317|gb|EAW77911.1|/6.74363e-47/hCG1652313 [Homo sapiens]
154442	1725	0	14	0.001	0.330576433902245	8.3688400713796	Up	8.21592e-06	2.8195507414161e-05	BVES-AS1	1	-	-	-	gi|55958949|emb|CAI13617.1|/3.99384e-49/novel protein [Homo sapiens]
100506068	522	0	10	0.001	0.308573781645764	8.26947167651643	Up	0.0002244	0.000643100664182731	DACT3-AS1	1	-	-	-	gi|28212280|ref|NP_777603.1|/8.5531e-06/uncharacterized protein C14orf178 isoform 1 [Homo sapiens]
197	1594	0	10	0.001	0.255531613408036	7.99735797677178	Up	0.0002244	0.000643621984435798	AHSG	2	GO:0032991//macromolecular complex;GO:0044421//extracellular region part	GO:0004866//endopeptidase inhibitor activity;GO:0005488//binding;GO:0030292//protein tyrosine kinase inhibitor activity	GO:0002526//acute inflammatory response;GO:0008406//gonad development;GO:0009887//organ morphogenesis;GO:0009968//negative regulation of signal transduction;GO:0016049//cell growth;GO:0016310//phosphorylation;GO:0021543//pallium development;GO:0030279//negative regulation of ossification;GO:0031347//regulation of defense response;GO:0032846;GO:0032868//response to insulin stimulus;GO:0045807//pos…	gi|221044722|dbj|BAH14038.1|/0/unnamed protein product [Homo sapiens]
2676	1980	0	12	0.001	0.246859025316611	7.94754358162906	Up	4.29378e-05	0.000135620892662025	GFRA3	3	GO:0009986//cell surface;GO:0031224//intrinsic to membrane;GO:0043227//membrane-bounded organelle;GO:0044424//intracellular part	GO:0004888//transmembrane signaling receptor activity;GO:0005515//protein binding	GO:0007399//nervous system development;GO:0016477//cell migration;GO:0023052//signaling;GO:0048468//cell development	gi|22035694|ref|NP_001487.2|/0/GDNF family receptor alpha-3 preproprotein [Homo sapiens]
54739	3638	2	370	0.0174113327562069	4.14259029565121	7.894362695069	Up	2.63906e-129	1.41477607454545e-127	XAF1	3	GO:0043231//intracellular membrane-bounded organelle	GO:0046914//transition metal ion binding	GO:0012501//programmed cell death;GO:0019221//cytokine-mediated signaling pathway	gi|1869901|emb|CAA68030.1|/0/XIAP associated factor-1 (ZAP-1) [Homo sapiens]//gi|1869901|emb|CAA68030.1|/1.30343e-147/XIAP associated factor-1 (ZAP-1) [Homo sapiens]//gi|1869901|emb|CAA68030.1|/6.03845e-163/XIAP associated factor-1 (ZAP-1) [Homo sapiens]//gi|1869901|emb|CAA68030.1|/7.79222e-172/XIAP associated factor-1 (ZAP-1) [Homo sapiens]//gi|2197085|gb|AAD04635.1|/1.2834e-102/ORF2-like protei…
84866	2551	0	14	0.001	0.223537572905281	7.80437353433001	Up	8.21592e-06	2.8184572565445e-05	TMEM25	1	GO:0031224//intrinsic to membrane	-	-	gi|221139830|ref|NP_001137506.1|/2.28279e-165/transmembrane protein 25 isoform 2 precursor [Homo sapiens]//gi|221139830|ref|NP_001137506.1|/2.28622e-165/transmembrane protein 25 isoform 2 precursor [Homo sapiens]//gi|221139834|ref|NP_001137508.1|/1.97615e-101/transmembrane protein 25 isoform 3 precursor [Homo sapiens]//gi|221139838|ref|NP_001137509.1|/3.73372e-169/transmembrane protein 25 isoform…
51554	2402	0	11	0.001	0.186531694816673	7.54327697880654	Up	9.81592e-05	0.000296589992690009	CCRL1	2	GO:0016021//integral to membrane	GO:0004950//chemokine receptor activity	GO:0002376//immune system process;GO:0007166//cell surface receptor signaling pathway;GO:0042221//response to chemical stimulus	gi|7706769|ref|NP_057641.1|/0/C-C chemokine receptor type 11 [Homo sapiens]
81030	2327	0	10	0.001	0.175039704242548	7.4515383953569	Up	0.0002244	0.000642996501457726	ZBP1	2	-	GO:0004000//adenosine deaminase activity;GO:0043566//structure-specific DNA binding	-	gi|238550206|ref|NP_110403.2|/0/Z-DNA-binding protein 1 isoform a [Homo sapiens]//gi|238550208|ref|NP_001153889.1|/0/Z-DNA-binding protein 1 isoform b [Homo sapiens]//gi|238550210|ref|NP_001153890.1|/0/Z-DNA-binding protein 1 isoform c [Homo sapiens]//gi|238550212|ref|NP_001153891.1|/6.72358e-130/Z-DNA-binding protein 1 isoform d [Homo sapiens]
780851	217	4	528	0.583801184950051	99.1076418690469	7.40737535391114	Up	7.3561e-182	5.70775285526316e-180	SNORD3A	1	-	-	-	gi|296489304|gb|DAA31417.1|/1.23247e-15/polypyrimidine tract binding protein 2-like [Bos taurus]
285180	3638	0	14	0.001	0.156746659835451	7.292290890281	Up	8.21592e-06	2.81900389294026e-05	RUFY4	3	-	GO:0046914//transition metal ion binding	-	gi|282165733|ref|NP_940885.2|/0/RUN and FYVE domain-containing protein 4 [Homo sapiens]
6755	2674	0	10	0.001	0.152325127813167	7.25101014066889	Up	0.0002244	0.000643413354943274	SSTR5	1	GO:0016021//integral to membrane;GO:0044424//intracellular part	GO:0008188//neuropeptide receptor activity	GO:0007188//adenylate cyclase-modulating G-protein coupled receptor signaling pathway;GO:0008283//cell proliferation;GO:0030073//insulin secretion;GO:0033500//carbohydrate homeostasis;GO:0051384//response to glucocorticoid stimulus	gi|4557865|ref|NP_001044.1|/6.68052e-174/somatostatin receptor type 5 [Homo sapiens]//gi|4557865|ref|NP_001044.1|/6.7344e-174/somatostatin receptor type 5 [Homo sapiens]
146336	2948	0	10	0.001	0.138167364916014	7.11027308166718	Up	0.0002244	0.000643517652780029	SSTR5-AS1	1	-	-	-	gi|119606096|gb|EAW85690.1|/4.09798e-134/hCG1983849 [Homo sapiens]
1780	3061	0	10	0.001	0.133066772875664	7.05600656123525	Up	0.0002244	0.000643309090909091	DYNC1I1	4	GO:0000776//kinetochore;GO:0005819//spindle;GO:0030286//dynein complex;GO:0044444//cytoplasmic part	GO:0003774//motor activity;GO:0015631//tubulin binding	GO:0051234//establishment of localization;GO:0051648//vesicle localization	gi|207113122|ref|NP_001129028.1|/0/cytoplasmic dynein 1 intermediate chain 1 isoform b [Homo sapiens]//gi|207113124|ref|NP_001129029.1|/0/cytoplasmic dynein 1 intermediate chain 1 isoform c [Homo sapiens]//gi|4758178|ref|NP_004402.1|/0/cytoplasmic dynein 1 intermediate chain 1 isoform a [Homo sapiens]
89	2938	0	10	0.001	0.131988785409076	7.04427154419151	Up	0.0002244	0.000643726349927031	ACTN3	1	GO:0005924//cell-substrate adherens junction;GO:0015629//actin cytoskeleton;GO:0042995//cell projection;GO:0044444//cytoplasmic part	GO:0003779//actin binding;GO:0005102//receptor binding;GO:0005198//structural molecule activity;GO:0008092//cytoskeletal protein binding;GO:0042802//identical protein binding;GO:0046872//metal ion binding	GO:0006915//apoptotic process;GO:0006936//muscle contraction;GO:0007044//cell-substrate junction assembly	gi|215273967|sp|Q08043.2|ACTN3_HUMAN/0/RecName: Full=Alpha-actinin-3; AltName: Full=Alpha-actinin skeletal muscle isoform 3; AltName: Full=F-actin cross-linking protein//gi|385648244|ref|NP_001245300.1|/0/alpha-actinin-3 isoform 2 [Homo sapiens]//gi|4557241|ref|NP_001095.1|/0/alpha-actinin-3 isoform 1 [Homo sapiens]
4939	3647	8	690	0.0694734615487585	7.70630656218706	6.79343378621822	Up	2.02734e-232	1.98152883646409e-230	OAS2	2	GO:0042598;GO:0043231//intracellular membrane-bounded organelle	GO:0003676//nucleic acid binding;GO:0016772//transferase activity, transferring phosphorus-containing groups;GO:0032559	GO:0002376//immune system process;GO:0019221//cytokine-mediated signaling pathway;GO:0034641//cellular nitrogen compound metabolic process	gi|119618432|gb|EAW98026.1|/0/2'-5'-oligoadenylate synthetase 2, 69/71kDa, isoform CRA_a [Homo sapiens]//gi|397525497|ref|XP_003832702.1|/0/PREDICTED: 2'-5'-oligoadenylate synthase 3 [Pan paniscus]//gi|74229021|ref|NP_001027903.1|/2.78844e-95/2'-5'-oligoadenylate synthase 2 isoform 3 [Homo sapiens]
5778	3719	0	10	0.001	0.107984462293852	6.75467993008715	Up	0.0002244	0.00064320486066105	PTPN7	1	GO:0044444//cytoplasmic part;GO:0044459//plasma membrane part	GO:0004721//phosphoprotein phosphatase activity;GO:0004871//signal transducer activity;GO:0005488//binding	GO:0006464//cellular protein modification process;GO:0006470//protein dephosphorylation;GO:0023052//signaling	gi|18375660|ref|NP_542155.1|/0/tyrosine-protein phosphatase non-receptor type 7 isoform 2 [Homo sapiens]//gi|312597450|pdb|3O4S|A/2.84535e-146/Chain A, Crystal Structure Of Heptp With A Closed Wpd Loop And An Ordered E- Loop//gi|315221140|ref|NP_002823.3|/0/tyrosine-protein phosphatase non-receptor type 7 isoform 1 [Homo sapiens]//gi|315221143|ref|NP_001186726.1|/0/tyrosine-protein phosphatase no…
91543	3512	4	311	0.0360719980450345	3.60693931780237	6.64375200468329	Up	7.58148e-105	3.38696875454545e-103	RSAD2	4	GO:0031090//organelle membrane;GO:0043231//intracellular membrane-bounded organelle	GO:0043169//cation binding;GO:0051540	GO:0001503//ossification;GO:0002252;GO:0051707//response to other organism	gi|189069214|dbj|BAG35552.1|/0/unnamed protein product [Homo sapiens]
3434	1876	169	12220	2.85311045518033	265.320817028722	6.5390584629766	Up	0	0	IFIT1	3	GO:0044424//intracellular part	GO:0005488//binding	GO:0019221//cytokine-mediated signaling pathway;GO:0034340//response to type I interferon;GO:0043330//response to exogenous dsRNA;GO:0043393//regulation of protein binding;GO:0045069//regulation of viral genome replication;GO:0050687//negative regulation of defense response to virus;GO:0051095	gi|116534937|ref|NP_001539.3|/0/interferon-induced protein with tetratricopeptide repeats 1 [Homo sapiens]
91074	4405	0	10	0.001	0.0924670582911257	6.53086758695447	Up	0.0002244	0.000642892372469636	ANKRD30A	2	GO:0043231//intracellular membrane-bounded organelle	GO:0001071//nucleic acid binding transcription factor activity;GO:0003676//nucleic acid binding	GO:0006351//transcription, DNA-dependent	gi|182676432|sp|Q9BXX3.3|AN30A_HUMAN/0/RecName: Full=Ankyrin repeat domain-containing protein 30A; AltName: Full=Serologically defined breast cancer antigen NY-BR-1
85495	341	15	870	1.3931619186308	103.919686463928	6.22096222968026	Up	6.82374e-285	8.10193183489933e-283	RPPH1	1	-	-	-	gi|297694574|ref|XP_002824585.1|/6.22082e-44/PREDICTED: uncharacterized protein LOC100433574 [Pongo abelii]
4599	3409	101	5721	0.938337530841176	68.3561982496318	6.18682138083481	Up	0	0	MX1	1	GO:0044444//cytoplasmic part	GO:0017111//nucleoside-triphosphatase activity;GO:0032561//guanyl ribonucleotide binding	GO:0006950//response to stress;GO:0009207;GO:0012502//induction of programmed cell death;GO:0019221//cytokine-mediated signaling pathway;GO:0051707//response to other organism	gi|222136617|ref|NP_002453.2|/0/interferon-induced GTP-binding protein Mx1 [Homo sapiens]
10561	1742	23	949	0.41816184186075	22.1896788055118	5.72968355551679	Up	4.23288e-301	5.31091348085106e-299	IFI44	4	GO:0044424//intracellular part	-	GO:0051707//response to other organism	gi|166706911|ref|NP_006408.3|/0/interferon-induced protein 44 [Homo sapiens]
6066	188	20	812	3.36927811527024	175.926447935742	5.7063890568505	Up	1.988028e-257	2.10600020047904e-255	RNU2-1	3	-	-	-	gi|24940209|emb|CAA24954.2|/1.26016e-12/unnamed protein product [Xenopus laevis]
10964	5889	12	439	0.0645363510617224	3.03637858699418	5.55609586336689	Up	2.6884e-138	1.55426419607843e-136	IFI44L	2	GO:0044424//intracellular part	-	GO:0002376//immune system process	gi|166706909|ref|NP_006811.2|/0/interferon-induced protein 44-like [Homo sapiens]
51296	2134	1	36	0.0148412438067199	0.68713336943799	5.532906235995	Up	2.25632e-12	1.3572443767426e-11	SLC15A3	2	GO:0005764//lysosome;GO:0031224//intrinsic to membrane	GO:0015295//solute:hydrogen symporter activity;GO:0015322	GO:0006811//ion transport;GO:0006818//hydrogen transport;GO:0009057//macromolecule catabolic process;GO:0015833//peptide transport	gi|119594321|gb|EAW73915.1|/0/solute carrier family 15, member 3, isoform CRA_a [Homo sapiens]//gi|7706117|ref|NP_057666.1|/0/solute carrier family 15 member 3 [Homo sapiens]
6023	277	26	929	2.97274935513374	136.605724533057	5.52207630279425	Up	3.95644e-290	4.76145442448979e-288	RMRP	3	-	-	-	-
4600	2961	9	301	0.0962650890077212	4.14057868704813	5.42667590987008	Up	2.76332e-94	1.10103365135135e-92	MX2	1	GO:0043231//intracellular membrane-bounded organelle	GO:0017111//nucleoside-triphosphatase activity;GO:0032561//guanyl ribonucleotide binding	GO:0006950//response to stress;GO:0009207;GO:0019221//cytokine-mediated signaling pathway;GO:0051707//response to other organism	gi|11342664|ref|NP_002454.1|/0/interferon-induced GTP-binding protein Mx2 [Homo sapiens]
684	983	7	202	0.225532553392454	8.37010306592335	5.21383779524688	Up	1.505204e-62	4.14775139626168e-61	BST2	2	GO:0005768//endosome;GO:0016021//integral to membrane	GO:0042802//identical protein binding;GO:0060089	GO:0002252;GO:0006952//defense response;GO:0006955//immune response;GO:0007154//cell communication;GO:0007249//I-kappaB kinase/NF-kappaB cascade;GO:0032501//multicellular organismal process;GO:0046649//lymphocyte activation	gi|4757876|ref|NP_004326.1|/4.91953e-63/bone marrow stromal antigen 2 [Homo sapiens]
8638	2103	88	2430	1.32528143459417	47.0652050407491	5.15029021440854	Up	0	0	OASL	1	GO:0031981//nuclear lumen	GO:0003723//RNA binding;GO:0003824//catalytic activity;GO:0008134//transcription factor binding;GO:0032559	GO:0002376//immune system process;GO:0019221//cytokine-mediated signaling pathway	gi|11321577|ref|NP_003724.1|/0/59 kDa 2'-5'-oligoadenylate synthase-like protein isoform a [Homo sapiens]//gi|38016930|ref|NP_937856.1|/4.56046e-147/59 kDa 2'-5'-oligoadenylate synthase-like protein isoform b [Homo sapiens]//gi|387849330|ref|NP_001248754.1|/0/59 kDa 2'-5'-oligoadenylate synthase-like protein isoform c [Homo sapiens]
25840	3390	1	26	0.00934254108659005	0.312396819648455	5.06342095269378	Up	6.52812e-09	3.04318763952569e-08	METTL7A	3	GO:0043231//intracellular membrane-bounded organelle;GO:0044444//cytoplasmic part	GO:0016741	-	gi|89145417|ref|NP_054752.3|/3.60457e-143/methyltransferase-like protein 7A precursor [Homo sapiens]
116071	2142	36	883	0.532289315689753	16.7909083536432	4.97932586075884	Up	5.11586e-262	5.51857800365853e-260	BATF2	3	GO:0043231//intracellular membrane-bounded organelle	GO:0001071//nucleic acid binding transcription factor activity;GO:0003677//DNA binding;GO:0005515//protein binding	GO:0006351//transcription, DNA-dependent	gi|45238854|ref|NP_612465.3|/9.59555e-128/basic leucine zipper transcriptional factor ATF-like 2 [Homo sapiens]
9636	685	262	6297	12.1136615215877	374.434688465819	4.95000718502855	Up	0	0	ISG15	3	GO:0044421//extracellular region part;GO:0044444//cytoplasmic part	GO:0005488//binding	GO:0001818//negative regulation of cytokine production;GO:0006464//cellular protein modification process;GO:0007154//cell communication;GO:0019221//cytokine-mediated signaling pathway;GO:0051603//proteolysis involved in cellular protein catabolic process;GO:0051707//response to other organism	gi|340780633|pdb|3SDL|C/5.89359e-76/Chain C, Crystal Structure Of Human Isg15 In Complex With Ns1 N-Terminal Region From Influenza B Virus, Northeast Structural Genomics Consortium Target Ids Hx6481, Hr2873, And Or2
8519	733	26	624	1.12339914239024	34.6747684128217	4.94794373527385	Up	5.19298e-185	4.13824365675676e-183	IFITM1	3	GO:0031224//intrinsic to membrane	GO:0005488//binding	GO:0002682//regulation of immune system process;GO:0006952//defense response;GO:0008283//cell proliferation;GO:0019221//cytokine-mediated signaling pathway;GO:0051707//response to other organism	gi|150010589|ref|NP_003632.3|/1.68183e-66/interferon-induced transmembrane protein 1 [Homo sapiens]
10537	1006	1	23	0.0314823203613721	0.931242545801729	4.8865431906097	Up	6.98636e-08	2.98036399228358e-07	UBD	3	GO:0016234//inclusion body;GO:0043231//intracellular membrane-bounded organelle	GO:0032403//protein complex binding	GO:0000236//mitotic prometaphase;GO:0001773//myeloid dendritic cell activation;GO:0006915//apoptotic process;GO:0007249//I-kappaB kinase/NF-kappaB cascade;GO:0009719;GO:0019941//modification-dependent protein catabolic process;GO:0032446//protein modification by small protein conjugation;GO:0034097//response to cytokine stimulus;GO:0070841	gi|222352096|ref|NP_006389.2|/4.13999e-89/ubiquitin D [Homo sapiens]
3433	3505	136	3030	1.22889733026005	35.2117459934493	4.84062047166266	Up	0	0	IFIT2	4	-	GO:0005488//binding	GO:0019221//cytokine-mediated signaling pathway;GO:0035455//response to interferon-alpha;GO:0043393//regulation of protein binding;GO:0051707//response to other organism	gi|34192824|gb|AAH32839.2|/0/Interferon-induced protein with tetratricopeptide repeats 2 [Homo sapiens]
64135	3617	49	1090	0.429054326760706	12.2747016044215	4.83838381010177	Up	0	0	IFIH1	3	GO:0043231//intracellular membrane-bounded organelle;GO:0044444//cytoplasmic part	GO:0003676//nucleic acid binding;GO:0017111//nucleoside-triphosphatase activity;GO:0032559;GO:0046914//transition metal ion binding	GO:0001818//negative regulation of cytokine production;GO:0006915//apoptotic process;GO:0006952//defense response;GO:0051707//response to other organism	gi|27886568|ref|NP_071451.2|/0/interferon-induced helicase C domain-containing protein 1 [Homo sapiens]
3437	2552	294	5973	3.64864302482792	95.3333378156974	4.70754889615798	Up	0	0	IFIT3	4	-	GO:0005488//binding	GO:0019221//cytokine-mediated signaling pathway	gi|31542980|ref|NP_001540.2|/0/interferon-induced protein with tetratricopeptide repeats 3 [Homo sapiens]
27074	3341	4	81	0.0379182451763427	0.987509989032179	4.70283123743732	Up	1.583842e-24	1.75672406407523e-23	LAMP3	3	GO:0005764//lysosome;GO:0031224//intrinsic to membrane	-	-	gi|38455385|ref|NP_055213.2|/0/lysosome-associated membrane glycoprotein 3 precursor [Homo sapiens]
677808	189	1	20	0.167572562346774	4.31023694997258	4.68490932944005	Up	7.37548e-07	2.83343358697068e-06	SNORA23	1	-	-	-	-
129607	3014	46	903	0.483369561062659	12.2033047369106	4.65800145597654	Up	9.15585999999999e-258	9.7576095939759e-256	CMPK2	1	GO:0043231//intracellular membrane-bounded organelle	GO:0000166//nucleotide binding;GO:0009041//uridylate kinase activity;GO:0032559	GO:0006221//pyrimidine nucleotide biosynthetic process;GO:0009197;GO:0032496//response to lipopolysaccharide	gi|117606370|ref|NP_997198.2|/1.04374e-117/UMP-CMP kinase 2, mitochondrial isoform 1 precursor [Homo sapiens]//gi|117606370|ref|NP_997198.2|/9.73211e-177/UMP-CMP kinase 2, mitochondrial isoform 1 precursor [Homo sapiens]//gi|374429552|ref|NP_001243406.1|/3.02411e-153/UMP-CMP kinase 2, mitochondrial isoform 2 precursor [Homo sapiens]//gi|374429554|ref|NP_001243407.1|/2.2015e-133/UMP-CMP kinase 2, …
6276	710	2	36	0.0892146881226487	2.0652712822263	4.532906235995	Up	2.52682e-11	1.41461938670886e-10	S100A5	1	GO:0043231//intracellular membrane-bounded organelle	GO:0042802//identical protein binding;GO:0046914//transition metal ion binding	-	gi|539547|pir||B48219/4.7974e-47/S-100 calcium-binding protein A5 - human
3429	665	21	358	1.0001436089539	21.9277633465447	4.45447958903819	Up	2.41906e-100	1.02627315251799e-98	IFI27	3	GO:0044464//cell part	-	GO:0043065//positive regulation of apoptotic process;GO:0050794//regulation of cellular process	gi|194272171|ref|NP_001123552.1|/4.53537e-09/interferon alpha-inducible protein 27, mitochondrial isoform 1 [Homo sapiens]//gi|55925614|ref|NP_005523.3|/1.19333e-14/interferon alpha-inducible protein 27, mitochondrial isoform 2 [Homo sapiens]
10346	3111	23	384	0.234149125207787	5.02763993701719	4.42438177921683	Up	4.82712e-107	2.21234663005181e-105	TRIM22	1	GO:0016604//nuclear body	GO:0001071//nucleic acid binding transcription factor activity;GO:0003712//transcription cofactor activity;GO:0003824//catalytic activity;GO:0046914//transition metal ion binding	GO:0002376//immune system process;GO:0006351//transcription, DNA-dependent;GO:0051259//protein oligomerization;GO:0051707//response to other organism	gi|117938316|ref|NP_006065.2|/0/E3 ubiquitin-protein ligase TRIM22 isoform 1 [Homo sapiens]//gi|313760629|ref|NP_001186502.1|/0/E3 ubiquitin-protein ligase TRIM22 isoform 2 [Homo sapiens]
80833	3654	3	48	0.0260026389848442	0.535063897237975	4.36298123455269	Up	2.09348e-14	1.42884856018519e-13	APOL3	2	GO:0044424//intracellular part	GO:0005488//binding;GO:0022892;GO:0060089	GO:0006952//defense response;GO:0007249//I-kappaB kinase/NF-kappaB cascade;GO:0010876//lipid localization;GO:0044238//primary metabolic process;GO:0044260;GO:0051234//establishment of localization	gi|13374353|gb|AAK20213.1|AF305227_1/3.58993e-149/apolipoprotein L3 [Homo sapiens]//gi|13374353|gb|AAK20213.1|AF305227_1/3.78842e-149/apolipoprotein L3 [Homo sapiens]//gi|13374353|gb|AAK20213.1|AF305227_1/4.01784e-149/apolipoprotein L3 [Homo sapiens]//gi|22035646|ref|NP_663615.1|/0/apolipoprotein L3 isoform 1 [Homo sapiens]//gi|22035646|ref|NP_663615.1|/1.95681e-171/apolipoprotein L3 isoform 1 [H…
200232	689	1	16	0.0459669292939627	0.945874930095579	4.36298123455269	Up	1.660692e-05	5.49865284896126e-05	FAM209A	3	GO:0031224//intrinsic to membrane	-	-	gi|119595942|gb|EAW75536.1|/1.33302e-91/hCG2018184, isoform CRA_a [Homo sapiens]
2537	860	364	5756	13.4050255804752	272.618477563021	4.34603747109429	Up	0	0	IFI6	2	GO:0031224//intrinsic to membrane;GO:0043231//intracellular membrane-bounded organelle	GO:0005488//binding	GO:0002376//immune system process;GO:0008637//apoptotic mitochondrial changes;GO:0010466//negative regulation of peptidase activity;GO:0019221//cytokine-mediated signaling pathway;GO:0032845;GO:0043066//negative regulation of apoptotic process	gi|13259548|ref|NP_075010.1|/2.05276e-56/interferon alpha-inducible protein 6 isoform b precursor [Homo sapiens]//gi|13259550|ref|NP_075011.1|/7.73625e-59/interferon alpha-inducible protein 6 isoform c precursor [Homo sapiens]//gi|13259552|ref|NP_002029.3|/5.4431e-54/interferon alpha-inducible protein 6 isoform a precursor [Homo sapiens]
725	1131	2	30	0.0560056839673568	1.08041748480745	4.26987183016121	Up	2.58978e-09	1.24330523690638e-08	C4BPB	1	-	-	GO:0002455//humoral immune response mediated by circulating immunoglobulin;GO:0006952//defense response;GO:0007599//hemostasis	gi|4502505|ref|NP_000707.1|/3.06274e-142/C4b-binding protein beta chain isoform 1 precursor [Homo sapiens]//gi|4502505|ref|NP_000707.1|/3.86856e-142/C4b-binding protein beta chain isoform 1 precursor [Homo sapiens]//gi|62912462|ref|NP_001017364.1|/1.12095e-141/C4b-binding protein beta chain isoform 2 precursor [Homo sapiens]//gi|62912462|ref|NP_001017364.1|/8.86455e-142/C4b-binding protein beta c…
130106	745	1	15	0.0425116970248863	0.820102131085387	4.26987183016121	Up	3.5943e-05	0.000114612042718097	CIB4	1	-	GO:0046872//metal ion binding	GO:0007166//cell surface receptor signaling pathway	gi|71274156|ref|NP_001025052.1|/1.76895e-95/calcium and integrin-binding family member 4 [Homo sapiens]
3665	2051	291	3772	4.49357550293039	74.9098586916395	4.0592198523195	Up	0	0	IRF7	2	GO:0031090//organelle membrane;GO:0031981//nuclear lumen;GO:0044444//cytoplasmic part	GO:0001071//nucleic acid binding transcription factor activity;GO:0003676//nucleic acid binding	GO:0002224//toll-like receptor signaling pathway;GO:0019221//cytokine-mediated signaling pathway;GO:0032481//positive regulation of type I interferon production;GO:0051707//response to other organism	gi|4758610|ref|NP_001563.2|/0/interferon regulatory factor 7 isoform a [Homo sapiens]//gi|4809284|ref|NP_004020.1|/0/interferon regulatory factor 7 isoform b [Homo sapiens]//gi|98985819|ref|NP_004022.2|/0/interferon regulatory factor 7 isoform d [Homo sapiens]
219285	7133	47	605	0.208684574698779	3.45474585759578	4.04918371503701	Up	1.343926e-157	8.87141599477612e-156	SAMD9L	2	-	-	-	gi|24899176|dbj|BAC23102.1|/0/KIAA2005 protein [Homo sapiens]
3773	4209	2	25	0.0150492821494608	0.241932401860542	4.00683742432741	Up	1.168076e-07	4.87253773072389e-07	KCNJ16	2	GO:0005887//integral to plasma membrane	GO:0005249//voltage-gated potassium channel activity;GO:0005488//binding	GO:0007267//cell-cell signaling;GO:0030001//metal ion transport;GO:0034220//ion transmembrane transport	gi|119609496|gb|EAW89090.1|/0/potassium inwardly-rectifying channel, subfamily J, member 16, isoform CRA_a [Homo sapiens]
283385	1172	2	25	0.0540464407568947	0.868851091664694	4.00683742432741	Up	1.168076e-07	4.87138908910891e-07	MORN3	4	-	-	-	gi|270265786|ref|NP_776254.3|/5.33121e-150/MORN repeat-containing protein 3 [Homo sapiens]
84875	3525	167	1775	1.50045185400035	20.5103083800291	3.77288025135804	Up	0	0	PARP10	3	GO:0031981//nuclear lumen	GO:0005488//binding;GO:0016763//transferase activity, transferring pentosyl groups	-	gi|157738665|ref|NP_116178.2|/0/poly [ADP-ribose] polymerase 10 [Homo sapiens]
5920	779	15	158	0.609843663996283	8.26137970475489	3.75987138712127	Up	5.16258e-40	9.16060208425276e-39	RARRES3	3	GO:0016020//membrane;GO:0044424//intracellular part	-	GO:0008283//cell proliferation;GO:0051726//regulation of cell cycle	gi|149588791|ref|NP_004576.2|/2.8841e-83/retinoic acid receptor responder protein 3 [Homo sapiens]
125050	332	99	1037	9.44412715081472	127.225341948189	3.7518247932863	Up	3.2084e-253	3.33881202352941e-251	RN7SK	2	GO:0044444//cytoplasmic part	GO:0016763//transferase activity, transferring pentosyl groups;GO:0042802//identical protein binding;GO:0046872//metal ion binding	GO:0006177//GMP biosynthetic process;GO:0006188//IMP biosynthetic process;GO:0007610//behavior;GO:0008219//cell death;GO:0009169;GO:0014075//response to amine stimulus;GO:0021544//subpallium development;GO:0021953//central nervous system neuron differentiation;GO:0032943//mononuclear cell proliferation;GO:0042053//regulation of dopamine metabolic process;GO:0043096//purine nucleobase salvage;GO:0…	gi|332831420|ref|XP_003312023.1|/1.1858e-24/PREDICTED: hypothetical protein LOC100608461 [Pan troglodytes]
866	1510	4	39	0.0838972563802392	1.0520118065645	3.64838345341494	Up	1.271546e-10	6.7735381770551e-10	SERPINA6	3	GO:0044421//extracellular region part	GO:0004866//endopeptidase inhibitor activity;GO:0008289//lipid binding	GO:0006508//proteolysis;GO:0008207//C21-steroid hormone metabolic process;GO:0010466//negative regulation of peptidase activity;GO:0051234//establishment of localization	gi|73858564|ref|NP_001747.2|/0/corticosteroid-binding globulin precursor [Homo sapiens]
128344	2346	2	19	0.027000182679915	0.329881945595727	3.61090874799627	Up	1.03573e-05	3.50547148077291e-05	C1orf88	4	-	-	-	gi|166197696|ref|NP_857594.2|/5.14384e-114/protein pitchfork [Homo sapiens]
6081	205	4	36	0.617974912849567	7.15289078234474	3.532906235995	Up	1.14034e-09	5.64300837482517e-09	SNORA73B	1	-	-	-	-
100861532	13357	5045	43327	11.9623625110774	132.124284145565	3.46532140668913	Up	0	0	RN45S	1	-	GO:0001071//nucleic acid binding transcription factor activity;GO:0005515//protein binding	GO:0006351//transcription, DNA-dependent	gi|68226711|ref|NP_001020173.1|/6.24964e-80/uncharacterized protein LOC310926 [Rattus norvegicus]
677772	266	2	17	0.23812943070331	2.60315626320712	3.45044407580303	Up	4.48674e-05	0.000141161154792815	SCARNA6	1	-	-	-	-
653188	1469	3	25	0.0646791305994696	0.693188209279116	3.42187492360626	Up	6.54486e-07	2.53303693415008e-06	GUSBP3	1	-	GO:0016798//hydrolase activity, acting on glycosyl bonds	GO:0044238//primary metabolic process;GO:0048731	gi|30582359|gb|AAP35406.1|/2.29908e-79/SMA3 [Homo sapiens]
346689	1544	2	15	0.0410248889683164	0.395709901333299	3.26987183016121	Up	0.0001906312	0.000552680524287119	KLRG2	2	-	-	-	gi|38348332|ref|NP_940910.1|/1.04341e-162/killer cell lectin-like receptor subfamily G member 2 [Homo sapiens]
692223	142	2	15	0.446073440613243	4.30264850463812	3.26987183016121	Up	0.0001906312	0.00055258996545961	SNORD97	1	-	-	-	-
3456	840	2	15	0.0754076530560483	0.727352485307873	3.26987183016121	Up	0.0001906312	0.000552499436304063	IFNB1	2	GO:0044421//extracellular region part	GO:0003712//transcription cofactor activity;GO:0005126//cytokine receptor binding	GO:0001959//regulation of cytokine-mediated signaling pathway;GO:0002252;GO:0006915//apoptotic process;GO:0007599//hemostasis;GO:0008283//cell proliferation;GO:0012502//induction of programmed cell death;GO:0019083//viral transcription;GO:0031349//positive regulation of defense response;GO:0042113//B cell activation;GO:0043330//response to exogenous dsRNA;GO:0045069//regulation of viral genome re…	gi|4504603|ref|NP_002167.1|/5.62995e-99/interferon beta precursor [Homo sapiens]
5413	2284	2	16	0.0303073820895122	0.285336176372966	3.23492152615809	Up	9.27304e-05	0.000280810254433413	SEPT5	2	GO:0005624//membrane fraction;GO:0016020//membrane;GO:0030136//clathrin-coated vesicle;GO:0032155;GO:0032156;GO:0032432//actin filament bundle;GO:0033267//axon part	GO:0000149//SNARE binding;GO:0005543//phospholipid binding;GO:0017111//nucleoside-triphosphatase activity;GO:0032561//guanyl ribonucleotide binding;GO:0042802//identical protein binding	GO:0006903//vesicle targeting;GO:0009207;GO:0017157//regulation of exocytosis	gi|62087916|dbj|BAD92405.1|/0/H5 variant [Homo sapiens]//gi|9945439|ref|NP_002679.2|/0/septin-5 isoform 1 [Homo sapiens]
100507463	1498	18	130	0.380561987385664	3.53479712486069	3.21542404613883	Up	4.55002e-29	5.93616547345133e-28	LOC100507463	1	GO:0042598;GO:0042824//MHC class I peptide loading complex	GO:0003823//antigen binding;GO:0015440//peptide-transporting ATPase activity;GO:0032559;GO:0042287//MHC protein binding;GO:0042802//identical protein binding;GO:0046977;GO:0046983//protein dimerization activity	GO:0001912//positive regulation of leukocyte mediated cytotoxicity;GO:0002474//antigen processing and presentation of peptide antigen via MHC class I;GO:0022415;GO:0045953//negative regulation of natural killer cell mediated cytotoxicity;GO:0046907//intracellular transport;GO:0051704	gi|221044006|dbj|BAH13680.1|/3.8739e-32/unnamed protein product [Homo sapiens]//gi|221044006|dbj|BAH13680.1|/4.12694e-32/unnamed protein product [Homo sapiens]//gi|221044006|dbj|BAH13680.1|/4.24714e-32/unnamed protein product [Homo sapiens]//gi|221044006|dbj|BAH13680.1|/4.83047e-32/unnamed protein product [Homo sapiens]
834	2019	10	71	0.156865845881824	1.43236923307781	3.19080025917001	Up	2.12184e-16	1.62923053125e-15	CASP1	1	GO:0044444//cytoplasmic part	GO:0004175//endopeptidase activity;GO:0005488//binding;GO:0016505//apoptotic protease activator activity	GO:0006915//apoptotic process;GO:0007249//I-kappaB kinase/NF-kappaB cascade;GO:0009612//response to mechanical stimulus;GO:0019538//protein metabolic process	gi|15431328|ref|NP_150634.1|/0/caspase-1 isoform alpha precursor [Homo sapiens]//gi|15431330|ref|NP_150635.1|/7.77657e-180/caspase-1 isoform gamma [Homo sapiens]//gi|15431332|ref|NP_150636.1|/1.79139e-150/caspase-1 isoform delta [Homo sapiens]//gi|15431334|ref|NP_150637.1|/2.26804e-46/caspase-1 isoform epsilon [Homo sapiens]//gi|4502573|ref|NP_001214.1|/0/caspase-1 isoform beta precursor [Homo sa…
7318	3330	35	237	0.332880630607781	2.89892558108291	3.12244146650598	Up	2.55866e-50	5.70091360957179e-49	UBA7	2	GO:0044444//cytoplasmic part	GO:0008641//small protein activating enzyme activity;GO:0032559	GO:0001818//negative regulation of cytokine production;GO:0006464//cellular protein modification process;GO:0051603//proteolysis involved in cellular protein catabolic process	gi|477152|pir||A48195/0/ubiquitin-protein ligase E1 homolog - human
54866	880	4	27	0.143960064925183	1.24972381566534	3.11786873671615	Up	7.09028e-07	2.72860873352186e-06	PPP1R14D	1	GO:0044424//intracellular part	GO:0019212//phosphatase inhibitor activity	GO:0006470//protein dephosphorylation;GO:0016310//phosphorylation;GO:0019222//regulation of metabolic process	gi|194306647|ref|NP_001123615.1|/3.36491e-66/protein phosphatase 1 regulatory subunit 14D isoform 2 [Homo sapiens]//gi|194306647|ref|NP_001123615.1|/6.29217e-96/protein phosphatase 1 regulatory subunit 14D isoform 2 [Homo sapiens]
152926	3725	21	136	0.178549127504522	1.48711853103483	3.05812665302427	Up	5.92892e-29	7.70106635242291e-28	PPM1K	3	GO:0043234//protein complex;GO:0044429//mitochondrial part	GO:0004721//phosphoprotein phosphatase activity;GO:0043169//cation binding	GO:0006464//cellular protein modification process	gi|167466276|ref|NP_689755.3|/0/protein phosphatase 1K, mitochondrial [Homo sapiens]
11309	4362	12	74	0.0871285124719128	0.691001535789964	2.98747209946048	Up	4.74524e-16	3.57073759421523e-15	SLCO2B1	2	GO:0031224//intrinsic to membrane;GO:0044459//plasma membrane part	GO:0008509//anion transmembrane transporter activity;GO:0015291//secondary active transmembrane transporter activity	GO:0015711//organic anion transport	gi|223634014|ref|NP_001138684.1|/0/solute carrier organic anion transporter family member 2B1 isoform 3 [Homo sapiens]//gi|40788970|dbj|BAA74903.2|/0/KIAA0880 protein [Homo sapiens]
27439	5043	3	18	0.0188406985624868	0.145383958990747	2.94794373527385	Up	9.28358e-05	0.000281081317439671	CECR6	1	-	-	-	gi|13994236|ref|NP_114096.1|/2.29963e-112/cat eye syndrome critical region protein 6 isoform a [Homo sapiens]//gi|13994236|ref|NP_114096.1|/3.27001e-119/cat eye syndrome critical region protein 6 isoform a [Homo sapiens]
10673	2675	14	84	0.165755887839089	1.27905274425728	2.94794373527384	Up	8.29014e-18	6.83415036067102e-17	TNFSF13B	2	GO:0000267//cell fraction;GO:0031224//intrinsic to membrane;GO:0044421//extracellular region part	GO:0032813//tumor necrosis factor receptor superfamily binding	GO:0006955//immune response;GO:0023052//signaling;GO:0031294;GO:0042110//T cell activation;GO:0042127//regulation of cell proliferation;GO:0050670;GO:0050864;GO:0051251//positive regulation of lymphocyte activation	gi|224548983|ref|NP_001139117.1|/4.93602e-121/tumor necrosis factor ligand superfamily member 13B isoform 2 [Homo sapiens]//gi|5730097|ref|NP_006564.1|/3.73839e-132/tumor necrosis factor ligand superfamily member 13B isoform 1 [Homo sapiens]
84941	2369	23	136	0.307487517315925	2.3383353854389	2.92688211974602	Up	9.55486e-28	1.19038752295775e-26	HSH2D	2	GO:0043231//intracellular membrane-bounded organelle	GO:0030674//protein binding, bridging	GO:0046649//lymphocyte activation	gi|14249584|ref|NP_116244.1|/0/hematopoietic SH2 domain-containing protein [Homo sapiens]
2633	3050	122	718	1.26684857134161	9.58865204237998	2.92008393081286	Up	3.29556e-139	1.92415022970297e-137	GBP1	2	GO:0031224//intrinsic to membrane	GO:0017111//nucleoside-triphosphatase activity;GO:0032561//guanyl ribonucleotide binding	GO:0009207;GO:0019221//cytokine-mediated signaling pathway	gi|166706903|ref|NP_002044.2|/0/interferon-induced guanylate-binding protein 1 [Homo sapiens]
6029	299	1552	9127	164.393727652356	1243.33974404909	2.91899340839215	Up	0	0	RN7SL1	1	-	-	-	gi|395504206|ref|XP_003756447.1|/1.39767e-35/PREDICTED: uncharacterized protein LOC100931706 [Sarcophilus harrisii]
431707	2393	6	35	0.0794096471797918	0.595742110824668	2.9073017507765	Up	4.4827e-08	1.94609682699387e-07	LHX8	1	GO:0043231//intracellular membrane-bounded organelle	GO:0001071//nucleic acid binding transcription factor activity;GO:0003677//DNA binding;GO:0046914//transition metal ion binding	GO:0006351//transcription, DNA-dependent;GO:0007610//behavior;GO:0008406//gonad development;GO:0021879//forebrain neuron differentiation;GO:0042476//odontogenesis	gi|51494804|gb|AAH40321.1|/0/LIM homeobox 8 [Homo sapiens]
23586	4759	729	4146	4.85150561309117	35.4851419686574	2.87071063133517	Up	0	0	DDX58	3	GO:0044444//cytoplasmic part	GO:0003676//nucleic acid binding;GO:0032559;GO:0042623//ATPase activity, coupled;GO:0046914//transition metal ion binding	GO:0001818//negative regulation of cytokine production;GO:0032481//positive regulation of type I interferon production;GO:0050691//regulation of defense response to virus by host	gi|27881482|ref|NP_055129.2|/0/probable ATP-dependent RNA helicase DDX58 [Homo sapiens]
5304	591	13	73	0.696659535847756	5.03116236876241	2.85236607529161	Up	3.56866e-15	2.55083491151515e-14	PIP	2	-	GO:0008092//cytoskeletal protein binding	-	gi|4505821|ref|NP_002643.1|/3.49591e-78/prolactin-inducible protein precursor [Homo sapiens]
5104	2312	9	50	0.123287598854612	0.880876712310572	2.8369124228851	Up	9.33706e-11	5.0344994958854e-10	SERPINA5	4	GO:0032991//macromolecular complex;GO:0044464//cell part	GO:0004866//endopeptidase inhibitor activity;GO:0005539//glycosaminoglycan binding;GO:0019899//enzyme binding	GO:0006508//proteolysis;GO:0007338//single fertilization;GO:0010466//negative regulation of peptidase activity;GO:0048232//male gamete generation	gi|194018472|ref|NP_000615.3|/0/plasma serine protease inhibitor precursor [Homo sapiens]
57664	3104	54	290	0.550981176324477	3.80547820921387	2.78800282240415	Up	1.440564e-54	3.49588720493827e-53	PLEKHA4	1	GO:0044464//cell part	GO:0008289//lipid binding;GO:0035091//phosphatidylinositol binding	-	gi|238859651|ref|NP_065955.2|/0/pleckstrin homology domain-containing family A member 4 isoform 1 [Homo sapiens]//gi|238859653|ref|NP_001154826.1|/0/pleckstrin homology domain-containing family A member 4 isoform 2 [Homo sapiens]
282616	734	6	32	0.258892759810956	1.7757706453293	2.77801873383153	Up	3.37124e-07	1.34720141947143e-06	IL28A	1	GO:0044421//extracellular region part	GO:0005102//receptor binding	GO:0051707//response to other organism	gi|26024321|ref|NP_742150.1|/2.7466e-101/interleukin-28A [Homo sapiens]
26471	938	29	154	0.979174002369582	6.68730046193507	2.77178678012002	Up	1.53272e-29	2.02655826008969e-28	NUPR1	1	GO:0043231//intracellular membrane-bounded organelle	-	GO:0009987//cellular process;GO:0012502//induction of programmed cell death;GO:0040007//growth;GO:0065007//biological regulation	gi|109948307|ref|NP_001035948.1|/4.05215e-27/nuclear protein 1 isoform a [Homo sapiens]//gi|384946402|gb|AFI36806.1|/5.89647e-17/nuclear protein 1 isoform b [Macaca mulatta]
8743	1953	105	554	1.70275345610432	11.5542158239587	2.76247788293575	Up	1.152622e-101	4.97342336634146e-100	TNFSF10	1	GO:0000267//cell fraction;GO:0016021//integral to membrane;GO:0044421//extracellular region part	GO:0032813//tumor necrosis factor receptor superfamily binding;GO:0043169//cation binding	GO:0002376//immune system process;GO:0006917//induction of apoptosis;GO:0007154//cell communication;GO:0007249//I-kappaB kinase/NF-kappaB cascade	gi|119598873|gb|EAW78467.1|/9.9189e-91/tumor necrosis factor (ligand) superfamily, member 10, isoform CRA_c [Homo sapiens]//gi|300193034|ref|NP_001177872.1|/3.38389e-26/tumor necrosis factor ligand superfamily member 10 isoform 3 [Homo sapiens]//gi|4507593|ref|NP_003801.1|/6.67409e-149/tumor necrosis factor ligand superfamily member 10 isoform 1 [Homo sapiens]//gi|4507593|ref|NP_003801.1|/9.11145…
933	3300	5	26	0.0479866883083944	0.320916732911595	2.74149285780642	Up	5.28464e-06	1.85570794442239e-05	CD22	1	GO:0009986//cell surface;GO:0016021//integral to membrane;GO:0044425//membrane part	GO:0004872//receptor activity;GO:0005488//binding;GO:0030246//carbohydrate binding	GO:0007165//signal transduction;GO:0009987//cellular process	gi|157168355|ref|NP_001762.2|/0/B-cell receptor CD22 isoform 1 precursor [Homo sapiens]//gi|297374825|ref|NP_001172028.1|/0/B-cell receptor CD22 isoform 2 precursor [Homo sapiens]//gi|297374828|ref|NP_001172029.1|/0/B-cell receptor CD22 isoform 3 precursor [Homo sapiens]//gi|297374830|ref|NP_001172030.1|/0/B-cell receptor CD22 isoform 4 precursor [Homo sapiens]
6080	207	21	107	3.21302173890988	21.0545704925834	2.71213079817508	Up	1.617708e-20	1.52552623816631e-19	SNORA73A	2	-	-	-	-
9473	2723	102	515	1.18636204807973	7.70357902176976	2.69898451465178	Up	2.89592e-92	1.12845199823789e-90	THEMIS2	1	-	-	GO:0006952//defense response;GO:0009987//cellular process	gi|157738677|ref|NP_001099026.1|/0/protein THEMIS2 isoform 3 [Homo sapiens]//gi|87080807|ref|NP_004839.2|/6.03616e-148/protein THEMIS2 isoform 1 [Homo sapiens]//gi|87080817|ref|NP_001034566.1|/9.68095e-65/protein THEMIS2 isoform 2 [Homo sapiens]
55008	3903	320	1611	2.59666630046961	16.8124088686997	2.69479391837189	Up	4.05072e-284	4.777419168e-282	HERC6	3	GO:0044444//cytoplasmic part	GO:0019787//small conjugating protein ligase activity	GO:0016567//protein ubiquitination	gi|259089405|ref|NP_001158608.1|/0/probable E3 ubiquitin-protein ligase HERC6 isoform 2 [Homo sapiens]//gi|61563742|ref|NP_060382.3|/0/probable E3 ubiquitin-protein ligase HERC6 isoform 1 [Homo sapiens]
85441	10002	1299	6417	4.11326808181552	26.1323305639227	2.66747878699101	Up	0	0	PRIC285	3	GO:0031981//nuclear lumen	GO:0003676//nucleic acid binding;GO:0003712//transcription cofactor activity;GO:0004518//nuclease activity;GO:0017111//nucleoside-triphosphatase activity;GO:0032559;GO:0046914//transition metal ion binding	GO:0006629//lipid metabolic process	gi|14133261|dbj|BAB21860.2|/0/KIAA1769 protein [Homo sapiens]//gi|156105693|ref|NP_001032412.2|/0/peroxisomal proliferator-activated receptor A-interacting complex 285 kDa protein isoform 1 [Homo sapiens]
3430	1260	790	3826	19.8573486380927	123.682249279463	2.63889354983434	Up	0	0	IFI35	4	GO:0043231//intracellular membrane-bounded organelle	-	GO:0002376//immune system process;GO:0019221//cytokine-mediated signaling pathway;GO:0051707//response to other organism	gi|306922358|ref|NP_005524.2|/2.15807e-160/interferon-induced 35 kDa protein [Homo sapiens]
115584	2407	12	57	0.157895542751343	0.964565489448579	2.61090874799628	Up	3.76756e-11	2.08743826996555e-10	SLC5A11	1	GO:0016020//membrane;GO:0031224//intrinsic to membrane;GO:0044459//plasma membrane part	GO:0015291//secondary active transmembrane transporter activity;GO:0015665//alcohol transmembrane transporter activity	GO:0006811//ion transport;GO:0009987//cellular process;GO:0012501//programmed cell death;GO:0015850//organic hydroxy compound transport;GO:0030001//metal ion transport	gi|17941285|ref|NP_443176.2|/0/sodium/myo-inositol cotransporter 2 isoform 1 [Homo sapiens]//gi|385862198|ref|NP_001245340.1|/0/sodium/myo-inositol cotransporter 2 isoform 2 [Homo sapiens]//gi|385862200|ref|NP_001245341.1|/0/sodium/myo-inositol cotransporter 2 isoform 3 [Homo sapiens] //gi|385862204|ref|NP_001245343.1|/0/sodium/myo-inositol cotransporter 2 isoform 5 [Homo sapiens]
54809	6855	388	1827	1.79262306958623	10.8558552117898	2.59832931099305	Up	0	0	SAMD9	3	GO:0044424//intracellular part	-	-	gi|24899174|dbj|BAC23101.1|/0/KIAA2004 protein [Homo sapiens]
51561	1049	12	56	0.362301783987115	2.17443030879456	2.58537365588914	Up	7.1586e-11	3.89310767291731e-10	IL23A	2	GO:0043234//protein complex;GO:0044421//extracellular region part	GO:0005126//cytokine receptor binding	GO:0001787//natural killer cell proliferation;GO:0001818//negative regulation of cytokine production;GO:0001819//positive regulation of cytokine production;GO:0001912//positive regulation of leukocyte mediated cytotoxicity;GO:0002763//positive regulation of myeloid leukocyte differentiation;GO:0002824;GO:0010455//positive regulation of cell fate commitment;GO:0010534;GO:0031349//positive regulati…	gi|11528343|gb|AAG37232.1|AF301620_1/1.86853e-87/interleukin 23 p19 subunit [Homo sapiens]
55601	6099	233	1084	1.20993489556729	7.23941716152305	2.58094413125228	Up	1.070644e-182	8.41811689066666e-181	DDX60	5	-	GO:0003676//nucleic acid binding;GO:0032559;GO:0042623//ATPase activity, coupled	-	gi|222831595|ref|NP_060101.3|/0/probable ATP-dependent RNA helicase DDX60 [Homo sapiens]
283849	2505	10	45	0.126431993147865	0.731707889411513	2.53290623599501	Up	8.18004e-09	3.78532795291656e-08	EXOC3L1	3	GO:0016023//cytoplasmic membrane-bounded vesicle;GO:0043234//protein complex	-	GO:0002790//peptide secretion;GO:0016192//vesicle-mediated transport	gi|106879204|ref|NP_848611.2|/0/exocyst complex component 3-like protein [Homo sapiens]
56111	4602	4	18	0.0275282175432771	0.1593157986072	2.532906235995	Up	0.000313236	0.000880994924642289	PCDHGA4	2	GO:0005626//insoluble fraction;GO:0031224//intrinsic to membrane	GO:0046872//metal ion binding	GO:0016337//cell-cell adhesion	gi|11056026|ref|NP_061740.1|/0/protocadherin gamma-A4 isoform 1 precursor [Homo sapiens]//gi|14196468|ref|NP_114442.1|/0/protocadherin gamma-A4 isoform 2 precursor [Homo sapiens]
634	3528	37	166	0.332152757508784	1.91651607239852	2.52856730027066	Up	9.48292e-29	1.22275756355685e-27	CEACAM1	1	GO:0005626//insoluble fraction;GO:0016021//integral to membrane;GO:0044459//plasma membrane part	-	GO:0007154//cell communication;GO:0007166//cell surface receptor signaling pathway;GO:0016337//cell-cell adhesion;GO:0048646//anatomical structure formation involved in morphogenesis;GO:0048870//cell motility	gi|19923195|ref|NP_001703.2|/0/carcinoembryonic antigen-related cell adhesion molecule 1 isoform 1 precursor [Homo sapiens]//gi|296317305|ref|NP_001171742.1|/0/carcinoembryonic antigen-related cell adhesion molecule 1 isoform 4 precursor [Homo sapiens]//gi|296317312|ref|NP_001171744.1|/0/carcinoembryonic antigen-related cell adhesion molecule 1 isoform 3 precursor [Homo sapiens]//gi|329112547|ref…
11274	2037	409	1823	6.3591196082317	36.45260703	2.51912304765007	Up	2.1215e-297	2.60635114583333e-295	USP18	3	GO:0043231//intracellular membrane-bounded organelle;GO:0044444//cytoplasmic part	GO:0016790//thiolester hydrolase activity;GO:0019783//small conjugating protein-specific protease activity	GO:0001959//regulation of cytokine-mediated signaling pathway;GO:0006464//cellular protein modification process;GO:0019941//modification-dependent protein catabolic process	gi|32313610|ref|NP_059110.2|/0/ubl carboxyl-terminal hydrolase 18 [Homo sapiens]
7098	3057	26	115	0.269365904930339	1.53227020130281	2.50803156735597	Up	3.36454e-20	3.12287917838405e-19	TLR3	2	GO:0016021//integral to membrane;GO:0031090//organelle membrane;GO:0043231//intracellular membrane-bounded organelle	GO:0003723//RNA binding;GO:0004872//receptor activity	GO:0002224//toll-like receptor signaling pathway;GO:0002252;GO:0002762//negative regulation of myeloid leukocyte differentiation;GO:0006468//protein phosphorylation;GO:0006970//response to osmotic stress;GO:0007249//I-kappaB kinase/NF-kappaB cascade;GO:0009612//response to mechanical stimulus;GO:0009615//response to virus;GO:0032481//positive regulation of type I interferon production;GO:0042108/…	gi|4507531|ref|NP_003256.1|/0/toll-like receptor 3 precursor [Homo sapiens]
197257	2096	12	53	0.181323745898131	1.02995332843214	2.50593918839474	Up	4.82448e-10	2.45752593377483e-09	LDHD	2	GO:0043231//intracellular membrane-bounded organelle	GO:0004457//lactate dehydrogenase activity;GO:0050662//coenzyme binding	GO:0008152//metabolic process	gi|37595754|ref|NP_705690.2|/0/probable D-lactate dehydrogenase, mitochondrial isoform 1 [Homo sapiens]//gi|37595756|ref|NP_919417.1|/0/probable D-lactate dehydrogenase, mitochondrial isoform 2 [Homo sapiens]
619373	1663	5	22	0.0952231337448595	0.538844414852254	2.50048475830262	Up	7.2218e-05	0.000221614681352992	MBOAT4	1	GO:0031227//intrinsic to endoplasmic reticulum membrane	GO:0008374//O-acyltransferase activity	GO:0018190	gi|187969413|gb|ACB05873.2|/0/ghrelin O-acyltransferase [Homo sapiens]
79132	2631	20	86	0.240754194477691	1.33140614566428	2.46731789436743	Up	3.35434e-15	2.40055133252427e-14	DHX58	2	GO:0044424//intracellular part	GO:0003676//nucleic acid binding;GO:0017111//nucleoside-triphosphatase activity;GO:0032559;GO:0046914//transition metal ion binding	GO:0006952//defense response	gi|149408122|ref|NP_077024.2|/0/probable ATP-dependent RNA helicase DHX58 [Homo sapiens]
83723	1943	7	30	0.114101132261854	0.628899729962546	2.4625169081036	Up	3.9778e-06	1.4193477168213e-05	FAM57B	4	GO:0031224//intrinsic to membrane;GO:0043231//intracellular membrane-bounded organelle	-	-	gi|109638743|ref|NP_113666.2|/1.30846e-152/protein FAM57B [Homo sapiens]
3008	785	5	21	0.201727479512995	1.08963888244848	2.43337056244409	Up	0.0001366514	0.000404196608827955	HIST1H1E	2	GO:0043231//intracellular membrane-bounded organelle	GO:0003676//nucleic acid binding	GO:0051276//chromosome organization	gi|57110423|ref|XP_545391.1|/7.35446e-31/PREDICTED: histone H1.4-like [Canis lupus familiaris]
677842	133	6	25	1.42877658421986	7.65634195060918	2.42187492360626	Up	3.17654e-05	0.000101915431882481	SNORA76	1	-	-	-	-
29126	3691	26	108	0.223097147486331	1.1918254757903	2.41742901857506	Up	2.60926e-18	2.20441349856734e-17	CD274	1	GO:0009986//cell surface;GO:0031224//intrinsic to membrane	GO:0004871//signal transducer activity;GO:0005488//binding	GO:0007165//signal transduction;GO:0031294;GO:0042098//T cell proliferation	gi|131573008|gb|ABO33159.1|/2.23259e-113/programmed cell death ligand 1 [Macaca nemestrina]//gi|390979639|ref|NP_001254635.1|/2.25692e-97/programmed cell death 1 ligand 1 isoform b precursor [Homo sapiens]//gi|7661534|ref|NP_054862.1|/2.82521e-165/programmed cell death 1 ligand 1 isoform a precursor [Homo sapiens]
83666	6801	844	3501	3.93037859951595	20.9677722187208	2.41543339227401	Up	0	0	PARP9	1	GO:0043231//intracellular membrane-bounded organelle;GO:0044444//cytoplasmic part	GO:0005488//binding;GO:0016763//transferase activity, transferring pentosyl groups	GO:0048870//cell motility	gi|226371706|ref|NP_113646.2|/0/poly [ADP-ribose] polymerase 9 isoform a [Homo sapiens]//gi|226371712|ref|NP_001139575.1|/0/poly [ADP-ribose] polymerase 9 isoform b [Homo sapiens]//gi|226371718|ref|NP_001139578.1|/0/poly [ADP-ribose] polymerase 9 isoform c [Homo sapiens]
7903	6330	69	284	0.345231245744752	1.82745875613529	2.4042038972792	Up	2.3754e-45	4.75913945639864e-44	ST8SIA4	1	GO:0031228//intrinsic to Golgi membrane	GO:0008373//sialyltransferase activity	GO:0006487//protein N-linked glycosylation;GO:0006935//chemotaxis;GO:0048731	gi|122425617|ref|NP_446366.1|/0/CMP-N-acetylneuraminate-poly-alpha-2,8-sialyltransferase [Rattus norvegicus]//gi|122425617|ref|NP_446366.1|/2.85395e-115/CMP-N-acetylneuraminate-poly-alpha-2,8-sialyltransferase [Rattus norvegicus]
84166	6742	273	1122	1.28244460092057	6.77855404284548	2.40208105424163	Up	9.36146e-174	6.78744216639344e-172	NLRC5	4	GO:0043231//intracellular membrane-bounded organelle;GO:0044444//cytoplasmic part	GO:0000977//RNA polymerase II regulatory region sequence-specific DNA binding;GO:0032559	GO:0001818//negative regulation of cytokine production;GO:0001960//negative regulation of cytokine-mediated signaling pathway;GO:0001961//positive regulation of cytokine-mediated signaling pathway;GO:0002252;GO:0006952//defense response;GO:0010557//positive regulation of macromolecule biosynthetic process;GO:0042325//regulation of phosphorylation;GO:0043433//negative regulation of sequence-specif…	gi|350529351|ref|NP_115582.4|/0/protein NLRC5 [Homo sapiens]
3431	2591	290	1175	3.54482907843562	18.4715528881737	2.38151718599012	Up	5.34878e-180	4.04381482820513e-178	SP110	3	GO:0043231//intracellular membrane-bounded organelle	GO:0003676//nucleic acid binding;GO:0046914//transition metal ion binding;GO:0060089	GO:0023052//signaling;GO:0051704	gi|190343006|ref|NP_536349.2|/0/sp110 nuclear body protein isoform c [Homo sapiens]//gi|190343008|ref|NP_004501.3|/0/sp110 nuclear body protein isoform b [Homo sapiens]//gi|190343010|ref|NP_004500.3|/0/sp110 nuclear body protein isoform a [Homo sapiens]//gi|297139787|ref|NP_001171944.1|/0/sp110 nuclear body protein isoform d [Homo sapiens]
3851	2147	18	72	0.265524851934665	1.36594560817948	2.36298123455269	Up	2.26128e-12	1.35976561794697e-11	KRT4	3	GO:0005882//intermediate filament	-	GO:0006996//organelle organization;GO:0008285//negative regulation of cell proliferation;GO:0030154//cell differentiation	gi|119617053|gb|EAW96647.1|/0/keratin 4 [Homo sapiens]
4938	1673	1133	4426	21.4485868399588	107.757727195737	2.32883682453319	Up	0	0	OAS1	2	GO:0042598;GO:0043231//intracellular membrane-bounded organelle	GO:0003676//nucleic acid binding;GO:0016772//transferase activity, transferring phosphorus-containing groups;GO:0032559	GO:0002376//immune system process;GO:0019221//cytokine-mediated signaling pathway;GO:0034641//cellular nitrogen compound metabolic process	gi|119618429|gb|EAW98023.1|/0/2',5'-oligoadenylate synthetase 1, 40/46kDa, isoform CRA_e [Homo sapiens]//gi|74229011|ref|NP_002525.2|/0/2'-5'-oligoadenylate synthase 1 isoform 2 [Homo sapiens]//gi|74229015|ref|NP_001027581.1|/0/2'-5'-oligoadenylate synthase 1 isoform 3 [Homo sapiens]
115361	6160	20	78	0.102828617803702	0.515759035036491	2.32645535852758	Up	4.58088e-13	2.88297218356457e-12	GBP4	4	GO:0031224//intrinsic to membrane;GO:0044424//intracellular part	GO:0017111//nucleoside-triphosphatase activity;GO:0032561//guanyl ribonucleotide binding	-	gi|34526533|dbj|BAC85144.1|/0/FLJ00316 protein [Homo sapiens]
140711	2041	9	35	0.139657485816689	0.698486463108001	2.32233925005534	Up	1.44865e-06	5.39879232146619e-06	C20orf118	1	-	-	-	gi|62909985|ref|NP_542195.1|/2.09078e-108/uncharacterized protein C20orf118 [Homo sapiens]
6289	2053	16	62	0.246828752331537	1.23008661908862	2.31717754493956	Up	1.279078e-10	6.81161014388922e-10	SAA2	2	GO:0005576//extracellular region;GO:0034358//plasma lipoprotein particle	GO:0005102//receptor binding	GO:0001775//cell activation;GO:0002526//acute inflammatory response;GO:0030155//regulation of cell adhesion;GO:0030595//leukocyte chemotaxis;GO:0031348//negative regulation of defense response;GO:0032732//positive regulation of interleukin-1 production;GO:0050707//regulation of cytokine secretion;GO:0051480//cytosolic calcium ion homeostasis	gi|188497687|ref|NP_001120852.1|/1.07182e-27/serum amyloid A-2 protein isoform b precursor [Homo sapiens]//gi|337743|gb|AAB59539.1|/1.33772e-53/amyloid A precursor [Homo sapiens]
26768	158	13	50	2.6058594030761	12.8897908788737	2.30639770618632	Up	8.90804e-09	4.10931253298566e-08	RNU105A	1	-	-	-	-
130733	1703	14	53	0.260362301802445	1.26763486576263	2.28354676705828	Up	3.9526e-09	1.88173968245425e-08	TMEM178A	2	GO:0031224//intrinsic to membrane	-	-	gi|20810493|gb|AAH29530.1|/5.86763e-90/Transmembrane protein 178 [Homo sapiens] //gi|269914178|ref|NP_689603.2|/2.64682e-146/transmembrane protein 178 isoform 1 precursor [Homo sapiens]
29103	2792	34	127	0.385680976232224	1.85276893821977	2.26420308007452	Up	9.44828e-20	8.58057091786448e-19	DNAJC15	2	GO:0031224//intrinsic to membrane;GO:0043231//intracellular membrane-bounded organelle	GO:0005515//protein binding	-	gi|66472920|ref|NP_037370.2|/3.62367e-69/dnaJ homolog subfamily C member 15 [Homo sapiens]
51700	1348	6	22	0.140969796514274	0.664761321883753	2.23745035246883	Up	0.000203748	0.000588202654699739	CYB5R2	3	GO:0000267//cell fraction;GO:0043231//intracellular membrane-bounded organelle	GO:0016653//oxidoreductase activity, acting on NAD(P)H, heme protein as acceptor	GO:0006694//steroid biosynthetic process	gi|119589057|gb|EAW68651.1|/1.25617e-161/cytochrome b5 reductase 2, isoform CRA_d [Homo sapiens]
312	1609	36	132	0.708616354386234	3.34157213884139	2.23745035246883	Up	3.4384e-20	3.18808880503145e-19	ANXA13	1	GO:0016020//membrane;GO:0031410//cytoplasmic vesicle	GO:0005543//phospholipid binding;GO:0046872//metal ion binding	GO:0048869//cellular developmental process	gi|51895795|ref|NP_004297.2|/1.13119e-166/annexin A13 isoform a [Homo sapiens]//gi|51896029|ref|NP_001003954.1|/0/annexin A13 isoform b [Homo sapiens]
1117	1516	6	22	0.125347813787099	0.591093840302968	2.23745035246883	Up	0.000203748	0.000588298656438714	CHI3L2	1	GO:0044421//extracellular region part	GO:0004553//hydrolase activity, hydrolyzing O-glycosyl compounds;GO:0043167//ion binding	GO:0006026	gi|119576884|gb|EAW56480.1|/0/chitinase 3-like 2, isoform CRA_a [Homo sapiens]//gi|1439568|gb|AAB04534.1|/0/chitinase, partial [Homo sapiens]
8651	1216	16	58	0.416726503730793	1.94279676996708	2.22096222968026	Up	1.406552e-09	6.90819306829539e-09	SOCS1	1	GO:0044444//cytoplasmic part	GO:0004857//enzyme inhibitor activity;GO:0005102//receptor binding;GO:0019887//protein kinase regulator activity;GO:0019900//kinase binding	GO:0001959//regulation of cytokine-mediated signaling pathway;GO:0002237//response to molecule of bacterial origin;GO:0009887//organ morphogenesis;GO:0010741//negative regulation of intracellular protein kinase cascade;GO:0030154//cell differentiation;GO:0042503//tyrosine phosphorylation of Stat3 protein;GO:0043627//response to estrogen stimulus	gi|4507233|ref|NP_003736.1|/4.07985e-92/suppressor of cytokine signaling 1 [Homo sapiens]
80830	10156	500	1806	1.55923662286039	7.24315881785122	2.21577912737146	Up	4.60022e-252	4.70419029017341e-250	APOL6	3	GO:0044424//intracellular part	GO:0005488//binding;GO:0022892	GO:0010876//lipid localization;GO:0044260;GO:0051234//establishment of localization	gi|13449281|ref|NP_085144.1|/8.19077e-149/apolipoprotein L6 [Homo sapiens]
55335	1781	10	35	0.17782826661168	0.800455289839096	2.1703361566103	Up	3.84372e-06	1.37538937135922e-05	NIPSNAP3B	2	GO:0043231//intracellular membrane-bounded organelle;GO:0044444//cytoplasmic part	-	-	gi|21361743|ref|NP_060846.2|/1.10377e-142/protein NipSnap homolog 3B [Homo sapiens]
171022	473	10	35	0.669581697326433	3.01397647188886	2.17033615661029	Up	3.84372e-06	1.37511123397371e-05	ABHD11-AS1	1	-	-	-	gi|148687449|gb|EDL19396.1|/1.68442e-15/mCG123213, isoform CRA_a [Mus musculus]
151636	5768	1123	3928	6.166222891889	27.7382578863041	2.16941823646678	Up	0	0	DTX3L	3	GO:0043231//intracellular membrane-bounded organelle	GO:0005515//protein binding;GO:0019787//small conjugating protein ligase activity;GO:0046914//transition metal ion binding	GO:0006325//chromatin organization;GO:0006513//protein monoubiquitination;GO:0033554//cellular response to stress	gi|19923717|ref|NP_612144.1|/0/E3 ubiquitin-protein ligase DTX3L [Homo sapiens]
136227	3034	27	94	0.281846666333417	1.26195895934761	2.16268258406686	Up	3.09882e-14	2.09321208934708e-13	EMID2	2	GO:0031012//extracellular matrix;GO:0043231//intracellular membrane-bounded organelle	GO:0005488//binding	GO:0010810//regulation of cell-substrate adhesion	gi|118498339|ref|NP_597714.2|/4.76018e-139/collagen alpha-1(XXVI) chain precursor [Homo sapiens]
27134	3140	107	362	1.07924201539453	4.69582470769465	2.12136013523474	Up	2.9493e-49	6.46543572490706e-48	TJP3	1	GO:0043296//apical junction complex	GO:0005488//binding	-	gi|389565501|ref|NP_001254490.1|/0/tight junction protein ZO-3 isoform 2 [Homo sapiens]
1590	2429	8	27	0.104310298175513	0.452761201229108	2.11786873671616	Up	6.7475e-05	0.000207925487719909	CYP21A1P	1	GO:0031090//organelle membrane;GO:0042598;GO:0043231//intracellular membrane-bounded organelle	GO:0004497//monooxygenase activity;GO:0005506//iron ion binding;GO:0008289//lipid binding	GO:0006700//C21-steroid hormone biosynthetic process	gi|180962|gb|AAA52063.1|/0/CYP21B protein [Homo sapiens]
146456	940	8	27	0.269542249221619	1.16995421041011	2.11786873671616	Up	6.7475e-05	0.000207961711672474	TMED6	3	GO:0031090//organelle membrane;GO:0031224//intrinsic to membrane;GO:0043231//intracellular membrane-bounded organelle	-	GO:0051234//establishment of localization	gi|269914167|ref|NP_653277.2|/9.33665e-141/transmembrane emp24 domain-containing protein 6 precursor [Homo sapiens]
148713	4095	16	54	0.123745892194541	0.537121835304275	2.11786873671615	Up	1.46444e-08	6.63102330176606e-08	PTPRVP	2	-	-	GO:0000077//DNA damage checkpoint;GO:0006464//cellular protein modification process;GO:0008283//cell proliferation;GO:0023052//signaling;GO:0032501//multicellular organismal process;GO:0048522//positive regulation of cellular process;GO:0065008	gi|397505151|ref|XP_003823136.1|/0/PREDICTED: LOW QUALITY PROTEIN: receptor-type tyrosine-protein phosphatase V-like [Pan paniscus]
9985	2354	301	1009	4.04971771425048	17.4589315334902	2.10807201689934	Up	5.22488e-133	2.87954367850467e-131	REC8	1	GO:0000793//condensed chromosome;GO:0031981//nuclear lumen;GO:0044427//chromosomal part	-	GO:0006310//DNA recombination;GO:0007059//chromosome segregation;GO:0007067//mitosis;GO:0007127//meiosis I;GO:0048232//male gamete generation	gi|158255818|dbj|BAF83880.1|/0/unnamed protein product [Homo sapiens]
378706	299	2811	9419	297.751783782715	1283.1178973593	2.10747168020301	Up	0	0	RN7SL2	1	-	-	-	gi|395504206|ref|XP_003756447.1|/1.35062e-38/PREDICTED: uncharacterized protein LOC100931706 [Sarcophilus harrisii]
5698	1048	221	740	6.67875797391451	28.7609608694258	2.10646013567757	Up	5.90272e-98	2.42848882604651e-96	PSMB9	4	GO:0000502//proteasome complex;GO:0043231//intracellular membrane-bounded organelle	GO:0004175//endopeptidase activity	GO:0002376//immune system process;GO:0006520//cellular amino acid metabolic process;GO:0006915//apoptotic process;GO:0007050//cell cycle arrest;GO:0016070//RNA metabolic process;GO:0030330//DNA damage response, signal transduction by p53 class mediator;GO:0043161//proteasomal ubiquitin-dependent protein catabolic process;GO:0051320//S phase;GO:0051439//regulation of ubiquitin-protein ligase activ…	gi|4506205|ref|NP_002791.1|/3.49946e-110/proteasome subunit beta type-9 proprotein [Homo sapiens]
9881	10499	529	1771	1.59577791751527	6.87074103084994	2.10620581919058	Up	1.069024e-231	1.03344828327869e-229	TRANK1	2	-	GO:0003676//nucleic acid binding;GO:0003678//DNA helicase activity;GO:0032559	GO:0006259//DNA metabolic process	gi|257467636|ref|NP_055646.2|/0/TPR and ankyrin repeat-containing protein 1 [Homo sapiens]
5148	1064	26	87	0.773920649785759	3.330508748515	2.10548501226033	Up	7.03436e-13	4.37723752233556e-12	PDE6G	3	GO:0044444//cytoplasmic part	GO:0004112//cyclic-nucleotide phosphodiesterase activity;GO:0004114//3',5'-cyclic-nucleotide phosphodiesterase activity;GO:0019002//GMP binding;GO:0030234//enzyme regulator activity	GO:0000165//MAPK cascade;GO:0001775//cell activation;GO:0007599//hemostasis;GO:0008277//regulation of G-protein coupled receptor protein signaling pathway;GO:0009967//positive regulation of signal transduction;GO:0050953//sensory perception of light stimulus	gi|119610072|gb|EAW89666.1|/2.86312e-75/phosphodiesterase 6G, cGMP-specific, rod, gamma [Homo sapiens] //gi|332849303|ref|XP_001154701.2|/8.04722e-16/PREDICTED: hypothetical protein LOC746726 [Pan troglodytes]
4133	9445	55	184	0.184427399215957	0.793503441885899	2.10518347708504	Up	1.354912e-25	1.56562692305683e-24	MAP2	1	GO:0005792//microsome;GO:0015630//microtubule cytoskeleton;GO:0030425//dendrite;GO:0031981//nuclear lumen;GO:0032991//macromolecular complex;GO:0044297//cell body	GO:0002162//dystroglycan binding	GO:0006468//protein phosphorylation;GO:0007019//microtubule depolymerization;GO:0031175//neuron projection development;GO:0048667//cell morphogenesis involved in neuron differentiation	gi|62088240|dbj|BAD92567.1|/0/microtubule-associated protein 2 isoform 2 variant [Homo sapiens]//gi|87578255|ref|NP_114035.2|/0/microtubule-associated protein 2 isoform 4 [Homo sapiens]//gi|87578394|ref|NP_001034627.1|/0/microtubule-associated protein 2 isoform 5 [Homo sapiens]//gi|87578396|ref|NP_002365.3|/0/microtubule-associated protein 2 isoform 1 [Homo sapiens]
55337	2139	700	2338	10.364586254548	44.5211810174797	2.10282933725202	Up	1.4e-304	1.82113235294118e-302	C19orf66	2	-	-	-	gi|154350198|ref|NP_060851.2|/2.42461e-147/UPF0515 protein C19orf66 [Homo sapiens]
3428	2750	753	2474	8.67215431109303	36.6437537179978	2.07910496485713	Up	0	0	IFI16	2	GO:0031981//nuclear lumen	GO:0043566//structure-specific DNA binding	GO:0002573//myeloid leukocyte differentiation;GO:0006351//transcription, DNA-dependent;GO:0008630//intrinsic apoptotic signaling pathway in response to DNA damage;GO:0051707//response to other organism	gi|330864753|ref|NP_001193496.1|/0/gamma-interferon-inducible protein 16 isoform 1 [Homo sapiens]//gi|62087558|dbj|BAD92226.1|/0/Interferon, gamma-inducible protein 16 variant [Homo sapiens]
722	2256	22	72	0.308850493899772	1.2999491226779	2.07347461735771	Up	1.038114e-10	5.57537181967213e-10	C4BPA	3	-	GO:0005488//binding	GO:0002455//humoral immune response mediated by circulating immunoglobulin;GO:0006952//defense response	gi|4502503|ref|NP_000706.1|/0/C4b-binding protein alpha chain precursor [Homo sapiens]
3134	1591	85	277	1.69205104594653	7.09157244003502	2.06733246446417	Up	7.08096e-37	1.15882759814986e-35	HLA-F	1	GO:0031224//intrinsic to membrane;GO:0042611	GO:0004888//transmembrane signaling receptor activity	GO:0002682//regulation of immune system process;GO:0019221//cytokine-mediated signaling pathway;GO:0048002//antigen processing and presentation of peptide antigen	gi|149158700|ref|NP_001091948.1|/6.5626e-114/HLA class I histocompatibility antigen, alpha chain F isoform 3 precursor [Homo sapiens]//gi|39644656|gb|AAH09260.2|/0/HLA-F protein, partial [Homo sapiens]
5616	7240	8	26	0.0349958168878898	0.14627420146523	2.06342095269379	Up	0.0001210394	0.000360732484063342	PRKY	1	-	GO:0004690//cyclic nucleotide-dependent protein kinase activity;GO:0032559	GO:0006464//cellular protein modification process	gi|302393592|ref|NP_001180591.1|/1.90286e-161/serine/threonine-protein kinase PRKX [Pan troglodytes]
8418	2484	8	26	0.102000690124123	0.426338654834244	2.06342095269379	Up	0.0001210394	0.00036085406562184	CMAHP	2	GO:0044424//intracellular part	GO:0016716//oxidoreductase activity, acting on paired donors, with incorporation or reduction of molecular oxygen, another compound as one donor, and incorporation of one atom of oxygen;GO:0043169//cation binding;GO:0051536//iron-sulfur cluster binding	GO:0006054//N-acetylneuraminate metabolic process;GO:0006091//generation of precursor metabolites and energy;GO:0051234//establishment of localization	gi|161777647|gb|ABX79190.1|/3.46974e-158/N-acetylneuraminic acid hydroxylase variant 3 [Sus scrofa]//gi|57526198|ref|NP_001009041.1|/0/cytidine monophosphate-N-acetylneuraminic acid hydroxylase [Pan troglodytes]
79054	5621	8	26	0.0450755584892941	0.188405126953969	2.06342095269378	Up	0.0001210394	0.000360793264599832	TRPM8	4	GO:0009986//cell surface;GO:0031224//intrinsic to membrane	GO:0004871//signal transducer activity;GO:0005261//cation channel activity;GO:0042802//identical protein binding	GO:0006816//calcium ion transport;GO:0006875//cellular metal ion homeostasis;GO:0006950//response to stress;GO:0009628//response to abiotic stimulus;GO:0050951//sensory perception of temperature stimulus;GO:0051260//protein homooligomerization	gi|109689695|ref|NP_076985.4|/0/transient receptor potential cation channel subfamily M member 8 [Homo sapiens]
6678	3604	34	110	0.298785040410757	1.24319958643077	2.05687810682701	Up	1.788806e-15	1.30390469493201e-14	SPARC	3	GO:0005578//proteinaceous extracellular matrix;GO:0031091//platelet alpha granule	GO:0005515//protein binding;GO:0046872//metal ion binding	GO:0001775//cell activation;GO:0006887//exocytosis;GO:0007599//hemostasis;GO:0008283//cell proliferation;GO:0023052//signaling;GO:0070848//response to growth factor stimulus	gi|119582071|gb|EAW61667.1|/4.38603e-163/secreted protein, acidic, cysteine-rich (osteonectin), isoform CRA_a [Homo sapiens]
3822	1223	31	100	0.802786298274529	3.33047744703523	2.05264111394054	Up	3.65486e-14	2.45475050341686e-13	KLRC2	3	GO:0016021//integral to membrane	GO:0004872//receptor activity;GO:0030246//carbohydrate binding	GO:0006952//defense response;GO:0023052//signaling	gi|75709169|ref|NP_002251.2|/4.79897e-133/NKG2-C type II integral membrane protein [Homo sapiens]
929	1661	148	473	2.82199862369895	11.5991045339163	2.03922424226314	Up	1.07732e-60	2.89208924430956e-59	CD14	1	GO:0031224//intrinsic to membrane;GO:0043235//receptor complex;GO:0044421//extracellular region part	GO:0001846//opsonin binding;GO:0008329//pattern recognition receptor activity	GO:0001819//positive regulation of cytokine production;GO:0006897//endocytosis;GO:0006952//defense response;GO:0007166//cell surface receptor signaling pathway;GO:0012501//programmed cell death;GO:0032496//response to lipopolysaccharide;GO:0070391	gi|4557417|ref|NP_000582.1|/0/monocyte differentiation antigen CD14 precursor [Homo sapiens]
66002	1783	48	153	0.852618219635409	3.49520812906217	2.03540657652418	Up	1.120718e-20	1.06652082506724e-19	CYP4F12	3	GO:0031090//organelle membrane;GO:0031224//intrinsic to membrane;GO:0042598;GO:0043231//intracellular membrane-bounded organelle	GO:0005506//iron ion binding;GO:0016712//oxidoreductase activity, acting on paired donors, with incorporation or reduction of molecular oxygen, reduced flavin or flavoprotein as one donor, and incorporation of one atom of oxygen	GO:0006952//defense response;GO:0044237//cellular metabolic process	gi|333033782|ref|NP_076433.3|/0/cytochrome P450 4F12 [Homo sapiens]
64761	3805	974	3091	8.10716497034645	33.0885166351778	2.02906121132857	Up	0	0	PARP12	2	GO:0043231//intracellular membrane-bounded organelle	GO:0016763//transferase activity, transferring pentosyl groups;GO:0046914//transition metal ion binding	-	gi|12232413|ref|NP_073587.1|/0/poly [ADP-ribose] polymerase 12 [Homo sapiens]
5696	1602	447	1416	8.83709911656836	36.0025859394339	2.02645576345237	Up	1.538412e-176	1.14353137361344e-174	PSMB8	3	GO:0000502//proteasome complex;GO:0043231//intracellular membrane-bounded organelle	GO:0004175//endopeptidase activity;GO:0005488//binding	GO:0002376//immune system process;GO:0006520//cellular amino acid metabolic process;GO:0006915//apoptotic process;GO:0007050//cell cycle arrest;GO:0016070//RNA metabolic process;GO:0019221//cytokine-mediated signaling pathway;GO:0030330//DNA damage response, signal transduction by p53 class mediator;GO:0043161//proteasomal ubiquitin-dependent protein catabolic process;GO:0051320//S phase;GO:00514…	gi|4758970|ref|NP_004150.1|/2.37607e-149/proteasome subunit beta type-8 isoform E1 proprotein [Homo sapiens]//gi|73747875|ref|NP_683720.2|/2.43175e-160/proteasome subunit beta type-8 isoform E2 proprotein [Homo sapiens]
112817	2501	44	139	0.557190495192232	2.26377918657996	2.0224906886389	Up	8.906e-19	7.70822142857143e-18	HOGA1	1	GO:0043231//intracellular membrane-bounded organelle	GO:0016832//aldehyde-lyase activity	-	gi|197927274|ref|NP_001128142.1|/9.32341e-93/probable 4-hydroxy-2-oxoglutarate aldolase, mitochondrial isoform 2 [Homo sapiens]//gi|31543060|ref|NP_612422.2|/5.10937e-176/probable 4-hydroxy-2-oxoglutarate aldolase, mitochondrial isoform 1 [Homo sapiens]
7133	3682	14	44	0.120422867998252	0.48674538940755	2.01505793113238	Up	7.61998e-07	2.92291990849957e-06	TNFRSF1B	2	GO:0005626//insoluble fraction;GO:0031224//intrinsic to membrane	GO:0005035//death receptor activity;GO:0005488//binding	GO:0002376//immune system process;GO:0012501//programmed cell death;GO:0019221//cytokine-mediated signaling pathway;GO:0031348//negative regulation of defense response;GO:0043487//regulation of RNA stability	gi|4507577|ref|NP_001057.1|/0/tumor necrosis factor receptor superfamily member 1B precursor [Homo sapiens]
4922	1256	392	1231	9.88464649613678	39.9209959611334	2.01388643692194	Up	1.769984e-152	1.12635924258993e-150	NTS	4	GO:0000267//cell fraction;GO:0016023//cytoplasmic membrane-bounded vesicle	GO:0005179//hormone activity	GO:0003018;GO:0023052//signaling	gi|5453816|ref|NP_006174.1|/1.74392e-77/neurotensin/neuromedin N preproprotein [Homo sapiens]
5359	2228	1340	4203	19.048216849167	76.8381955843552	2.01216769035953	Up	0	0	PLSCR1	2	GO:0031224//intrinsic to membrane	GO:0005548//phospholipid transporter activity;GO:0019904//protein domain specific binding;GO:0046872//metal ion binding	GO:0001775//cell activation;GO:0006869//lipid transport;GO:0007009//plasma membrane organization;GO:0030097//hemopoiesis;GO:0051707//response to other organism	gi|10863877|ref|NP_066928.1|/1.6019e-141/phospholipid scramblase 1 [Homo sapiens]
1890	1851	181	567	3.09696908985456	12.4769833136119	2.01034027241172	Up	4.47908e-71	1.37092394948097e-69	TYMP	1	GO:0044444//cytoplasmic part	GO:0016758//transferase activity, transferring hexosyl groups;GO:0016763//transferase activity, transferring pentosyl groups;GO:0070851//growth factor receptor binding	GO:0006213//pyrimidine nucleoside metabolic process;GO:0006259//DNA metabolic process;GO:0007005//mitochondrion organization;GO:0008655//pyrimidine-containing compound salvage;GO:0009112;GO:0009117//nucleotide metabolic process;GO:0032501//multicellular organismal process;GO:0042221//response to chemical stimulus;GO:0048646//anatomical structure formation involved in morphogenesis;GO:0048869//cel…	gi|384229051|ref|NP_001244918.1|/0/thymidine phosphorylase isoform 2 proprotein [Homo sapiens]//gi|4503445|ref|NP_001944.1|/0/thymidine phosphorylase isoform 1 proprotein [Homo sapiens]
218	1944	17434	54492	284.030838384383	1141.74584940649	2.00712206247008	Up	0	0	ALDH3A1	1	GO:0043231//intracellular membrane-bounded organelle;GO:0044444//cytoplasmic part	GO:0004030//aldehyde dehydrogenase [NAD(P)+] activity;GO:0004033//aldo-keto reductase (NADP) activity	GO:0006950//response to stress;GO:0008283//cell proliferation;GO:0031667//response to nutrient levels;GO:0031960//response to corticosteroid stimulus;GO:0032502//developmental process;GO:0044237//cellular metabolic process	gi|22907049|ref|NP_000682.3|/0/aldehyde dehydrogenase, dimeric NADP-preferring [Homo sapiens]//gi|33871063|gb|AAH04102.1|/0/ALDH3A1 protein [Homo sapiens]//gi|355333088|pdb|3SZA|A/0/Chain A, Crystal Structure Of Human Aldh3a1 - Apo Form
150244	2548	43	133	0.534482815617046	2.12610726474609	1.99199891535178	Up	1.062534e-17	8.69037863800277e-17	ZDHHC8P1	1	GO:0016020//membrane;GO:0031982//vesicle	GO:0016740//transferase activity;GO:0046872//metal ion binding	-	gi|16551449|dbj|BAB71099.1|/1.40591e-96/unnamed protein product [Homo sapiens]
9830	4454	856	2632	6.08678927407061	24.0695863301522	1.98345802188678	Up	0	0	TRIM14	1	GO:0044424//intracellular part	GO:0046914//transition metal ion binding	-	gi|15208663|ref|NP_055603.2|/0/tripartite motif-containing protein 14 [Homo sapiens]
629	2646	576	1754	6.89441399369584	27.0005557508997	1.96948926555511	Up	4.34966e-210	3.847491753e-208	CFB	5	GO:0016020//membrane	GO:0004175//endopeptidase activity;GO:0005515//protein binding	GO:0006952//defense response;GO:0006956//complement activation	gi|67782358|ref|NP_001701.2|/0/complement factor B preproprotein [Homo sapiens]
51191	3520	514	1552	4.62471708572151	17.9589940917835	1.95726952754594	Up	1.391578e-184	1.09903599991071e-182	HERC5	3	GO:0044444//cytoplasmic part	GO:0019787//small conjugating protein ligase activity	GO:0001818//negative regulation of cytokine production;GO:0006952//defense response;GO:0016567//protein ubiquitination;GO:0051707//response to other organism;GO:0051726//regulation of cell cycle	gi|110825982|ref|NP_057407.2|/0/E3 ISG15--protein ligase HERC5 [Homo sapiens]
128153	1251	30	90	0.759501541571709	2.93034094800294	1.94794373527385	Up	4.04994e-12	2.39303568937876e-11	SPATA17	2	GO:0044424//intracellular part	GO:0005515//protein binding	-	gi|20270345|ref|NP_620151.1|/0/spermatogenesis-associated protein 17 [Homo sapiens]
398	942	12	36	0.403454959025991	1.5566269749264	1.94794373527384	Up	1.258088e-05	4.21371351912154e-05	ARHGDIG	3	GO:0005626//insoluble fraction;GO:0031410//cytoplasmic vesicle	GO:0005092//GDP-dissociation inhibitor activity;GO:0008047//enzyme activator activity	GO:0007155//cell adhesion;GO:0007265//Ras protein signal transduction;GO:0008104//protein localization;GO:0009966//regulation of signal transduction	gi|83313661|ref|NP_001167.2|/7.04959e-112/rho GDP-dissociation inhibitor 3 [Homo sapiens]
4940	6646	3182	9502	15.1636779792695	58.2354778305963	1.94127860563249	Up	0	0	OAS3	2	GO:0042598	GO:0003676//nucleic acid binding;GO:0016772//transferase activity, transferring phosphorus-containing groups;GO:0032559	GO:0002376//immune system process;GO:0019221//cytokine-mediated signaling pathway;GO:0034641//cellular nitrogen compound metabolic process	gi|45007007|ref|NP_006178.2|/0/2'-5'-oligoadenylate synthase 3 [Homo sapiens]
6424	2974	35	104	0.372727807640857	1.42437823619134	1.93413793574881	Up	1.149418e-13	7.46762902607418e-13	SFRP4	3	GO:0043231//intracellular membrane-bounded organelle;GO:0044421//extracellular region part	GO:0004888//transmembrane signaling receptor activity;GO:0019904//protein domain specific binding	GO:0002090//regulation of receptor internalization;GO:0006357//regulation of transcription from RNA polymerase II promoter;GO:0006915//apoptotic process;GO:0007417//central nervous system development;GO:0008283//cell proliferation;GO:0009888//tissue development;GO:0030177//positive regulation of Wnt receptor signaling pathway;GO:0030178//negative regulation of Wnt receptor signaling pathway;GO:00…	gi|119614491|gb|EAW94085.1|/0/secreted frizzled-related protein 4 [Homo sapiens]
201229	1495	49	145	1.03805317718627	3.95057002053507	1.92818048045242	Up	2.09262e-18	1.77897839596348e-17	C17orf108	1	-	-	-	gi|119571437|gb|EAW51052.1|/8.5031e-29/hCG28999, isoform CRA_b [Homo sapiens]
6352	1237	174	508	4.45496466074051	16.727343170605	1.90872242547613	Up	1.164912e-59	3.06673485e-58	CCL5	2	GO:0000267//cell fraction;GO:0044421//extracellular region part;GO:0044424//intracellular part	GO:0005125//cytokine activity;GO:0030296//protein tyrosine kinase activator activity;GO:0042802//identical protein binding;GO:0048019//receptor antagonist activity;GO:0048020//CCR chemokine receptor binding	GO:0001660//fever generation;GO:0001960//negative regulation of cytokine-mediated signaling pathway;GO:0002237//response to molecule of bacterial origin;GO:0002274;GO:0002544//chronic inflammatory response;GO:0002548//monocyte chemotaxis;GO:0002690//positive regulation of leukocyte chemotaxis;GO:0002763//positive regulation of myeloid leukocyte differentiation;GO:0006446//regulation of translatio…	gi|355778213|gb|EHH63249.1|/2.20616e-52/hypothetical protein EGM_16173, partial [Macaca fascicularis]
3934	840	464	1348	17.4945755090032	65.3647433463342	1.90160502060698	Up	1.819168e-154	1.18319489294118e-152	LCN2	3	GO:0044421//extracellular region part;GO:0044444//cytoplasmic part	GO:0019899//enzyme binding;GO:0042802//identical protein binding;GO:0046914//transition metal ion binding	GO:0006915//apoptotic process;GO:0006952//defense response;GO:0010467//gene expression;GO:0015688//iron chelate transport;GO:0030030//cell projection organization;GO:0031667//response to nutrient levels;GO:0032496//response to lipopolysaccharide;GO:0034612//response to tumor necrosis factor;GO:0034614//cellular response to reactive oxygen species;GO:0051260//protein homooligomerization;GO:0070555…	gi|119608154|gb|EAW87748.1|/1.62337e-106/lipocalin 2 (oncogene 24p3), isoform CRA_a [Homo sapiens]
10252	2626	17	49	0.205030709375546	0.760036260352172	1.89022823741756	Up	5.67258e-07	2.21189360326207e-06	SPRY1	1	GO:0016020//membrane;GO:0031252//cell leading edge;GO:0044444//cytoplasmic part	-	GO:0001822//kidney development;GO:0003156//regulation of organ formation;GO:0007173//epidermal growth factor receptor signaling pathway;GO:0008283//cell proliferation;GO:0008543//fibroblast growth factor receptor signaling pathway;GO:0034260//negative regulation of GTPase activity;GO:0035295//tube development;GO:0043405//regulation of MAP kinase activity;GO:0043409//negative regulation of MAPK ca…	gi|40538726|ref|NP_005832.1|/3.92948e-170/protein sprouty homolog 1 [Homo sapiens]//gi|40538726|ref|NP_005832.1|/3.94762e-170/protein sprouty homolog 1 [Homo sapiens]//gi|40538726|ref|NP_005832.1|/4.28616e-170/protein sprouty homolog 1 [Homo sapiens]//gi|40538726|ref|NP_005832.1|/4.42081e-170/protein sprouty homolog 1 [Homo sapiens]
10379	1699	1091	3135	20.3374307141509	75.1583297943791	1.88579557591849	Up	0	0	IRF9	4	GO:0031981//nuclear lumen;GO:0044444//cytoplasmic part	GO:0001071//nucleic acid binding transcription factor activity;GO:0003676//nucleic acid binding;GO:0005515//protein binding	GO:0006351//transcription, DNA-dependent;GO:0019221//cytokine-mediated signaling pathway;GO:0042089//cytokine biosynthetic process;GO:0051707//response to other organism	gi|25282407|ref|NP_006075.3|/0/interferon regulatory factor 9 [Homo sapiens]
340393	979	15	43	0.485258645815224	1.78903450931701	1.88235539364626	Up	3.02444e-06	1.09417930552147e-05	TMEM249	1	-	-	-	gi|119602529|gb|EAW82123.1|/4.25569e-99/hCG2036558, isoform CRA_a [Homo sapiens]//gi|83016720|dbj|BAE53436.1|/2.32316e-113/C8orfK29 protein [Homo sapiens]//gi|83016720|dbj|BAE53436.1|/7.65983e-109/C8orfK29 protein [Homo sapiens]
113278	2716	22	63	0.256541500087587	0.944808382977237	1.88082953941531	Up	1.523008e-08	6.88037143207355e-08	SLC52A3	3	GO:0016021//integral to membrane	GO:0051183//vitamin transporter activity	GO:0009408//response to heat;GO:0050954//sensory perception of mechanical stimulus;GO:0051180//vitamin transport	gi|156564359|ref|NP_212134.3|/0/solute carrier family 52, riboflavin transporter, member 3 [Homo sapiens]
353324	2430	14	40	0.182467901222043	0.670481303329068	1.87755440738245	Up	7.00472e-06	2.42458425983174e-05	SPATA12	1	-	-	-	gi|119585732|gb|EAW65328.1|/1.31816e-128/spermatogenesis associated 12 [Homo sapiens]
79924	4273	19	54	0.1408268362713	0.51474699638919	1.86994122327257	Up	1.8389e-07	7.53055090277778e-07	ADM2	1	-	GO:0005102//receptor binding	GO:0032501//multicellular organismal process;GO:0050896//response to stimulus;GO:0065007//biological regulation	gi|47678489|emb|CAG30365.1|/7.2373e-138/dJ579N16.4 [Homo sapiens]//gi|47678489|emb|CAG30365.1|/7.65316e-138/dJ579N16.4 [Homo sapiens]
3109	1412	12	34	0.269160461333204	0.980792586420814	1.86548157508187	Up	3.78602e-05	0.000120551619546436	HLA-DMB	4	GO:0005764//lysosome;GO:0005770//late endosome;GO:0031224//intrinsic to membrane;GO:0042611	-	GO:0019221//cytokine-mediated signaling pathway;GO:0019882//antigen processing and presentation;GO:0031294;GO:0050851//antigen receptor-mediated signaling pathway	gi|18654259|gb|AAL77571.1|L40560_1/2.45373e-147/major histocompatibility complex, partial [Gorilla gorilla]
240	2581	41	116	0.50310723968429	1.83063996302206	1.86341022506218	Up	2.1096e-14	1.4392955495565e-13	ALOX5	1	GO:0000267//cell fraction;GO:0005635//nuclear envelope;GO:0005886//plasma membrane;GO:0034399//nuclear periphery;GO:0043005//neuron projection;GO:0044444//cytoplasmic part	GO:0016702//oxidoreductase activity, acting on single donors with incorporation of molecular oxygen, incorporation of two atoms of oxygen;GO:0046914//transition metal ion binding	GO:0000038//very long-chain fatty acid metabolic process;GO:0002538;GO:0006691//leukotriene metabolic process;GO:0007600//sensory perception;GO:0009058//biosynthetic process;GO:0019229//regulation of vasoconstriction;GO:0031667//response to nutrient levels	gi|371877525|ref|NP_001243082.1|/0/arachidonate 5-lipoxygenase isoform 2 [Homo sapiens]//gi|371877598|ref|NP_001243083.1|/0/arachidonate 5-lipoxygenase isoform 3 [Homo sapiens]//gi|4502057|ref|NP_000689.1|/0/arachidonate 5-lipoxygenase isoform 1 [Homo sapiens]
5371	5600	811	2293	4.58667049713414	16.6781924881095	1.86244376991621	Up	5.29468e-254	5.54249608757396e-252	PML	2	GO:0000267//cell fraction;GO:0005635//nuclear envelope;GO:0005769//early endosome;GO:0005789//endoplasmic reticulum membrane;GO:0016604//nuclear body;GO:0034399//nuclear periphery	GO:0003676//nucleic acid binding;GO:0003712//transcription cofactor activity;GO:0019899//enzyme binding;GO:0032182//small conjugating protein binding;GO:0042802//identical protein binding;GO:0046914//transition metal ion binding;GO:0046983//protein dimerization activity	GO:0001525//angiogenesis;GO:0006468//protein phosphorylation;GO:0006606//protein import into nucleus;GO:0006874//cellular calcium ion homeostasis;GO:0006886//intracellular protein transport;GO:0007004//telomere maintenance via telomerase;GO:0007178//transmembrane receptor protein serine/threonine kinase signaling pathway;GO:0007346//regulation of mitotic cell cycle;GO:0007568//aging;GO:0008283//c…	gi|15451765|ref|NP_150242.1|/0/protein PML isoform 9 [Homo sapiens]//gi|4505903|ref|NP_002666.1|/0/protein PML isoform 6 [Homo sapiens]//gi|62088402|dbj|BAD92648.1|/0/promyelocytic leukemia protein isoform 1 variant [Homo sapiens]//gi|67089149|ref|NP_150241.2|/0/protein PML isoform 1 [Homo sapiens]//gi|67089157|ref|NP_150243.2|/0/protein PML isoform 2 [Homo sapiens]//gi|67089160|ref|NP_150253.2|/…
54625	7713	1797	5063	7.37886322669803	26.7373000718748	1.85738330995256	Up	0	0	PARP14	2	GO:0016020//membrane;GO:0043231//intracellular membrane-bounded organelle	GO:0016763//transferase activity, transferring pentosyl groups	-	gi|154813199|ref|NP_060024.2|/0/poly [ADP-ribose] polymerase 14 [Homo sapiens]
9971	2492	10	28	0.127091550094463	0.457659990755515	1.84840806172293	Up	0.000207338	0.000597786270860495	NR1H4	1	GO:0031981//nuclear lumen	GO:0001071//nucleic acid binding transcription factor activity;GO:0003677//DNA binding;GO:0003712//transcription cofactor activity;GO:0004879//ligand-activated sequence-specific DNA binding RNA polymerase II transcription factor activity;GO:0042974//retinoic acid receptor binding;GO:0046914//transition metal ion binding	GO:0008202//steroid metabolic process;GO:0009755//hormone-mediated signaling pathway;GO:0023052//signaling	gi|332801015|ref|NP_001193906.1|/0/bile acid receptor isoform 1 [Homo sapiens]//gi|332801017|ref|NP_001193907.1|/0/bile acid receptor isoform 5 [Homo sapiens]//gi|332801065|ref|NP_001193921.1|/0/bile acid receptor isoform 4 [Homo sapiens]//gi|332801067|ref|NP_001193922.1|/0/bile acid receptor isoform 3 [Homo sapiens]//gi|4826980|ref|NP_005114.1|/0/bile acid receptor isoform 2 [Homo sapiens]
91461	2517	482	1333	6.06496832922782	21.5714772837752	1.8305529634117	Up	4.95528e-145	3.02289167172414e-143	PKDCC	2	GO:0043231//intracellular membrane-bounded organelle	GO:0016301//kinase activity;GO:0032559	GO:0002062//chondrocyte differentiation;GO:0006464//cellular protein modification process;GO:0030282//bone mineralization;GO:0042996//regulation of Golgi to plasma membrane protein transport;GO:0048565//digestive tract development	gi|208431817|ref|NP_612379.2|/0/protein kinase domain-containing protein, cytoplasmic precursor [Homo sapiens]
8673	790	40	110	1.60360578650837	5.67150798670442	1.82241285318998	Up	2.32344e-13	1.48497026878613e-12	VAMP8	4	GO:0005626//insoluble fraction;GO:0005764//lysosome;GO:0005770//late endosome;GO:0030141//secretory granule;GO:0031224//intrinsic to membrane;GO:0043234//protein complex	GO:0000149//SNARE binding	GO:0016044//cellular membrane organization;GO:0048193//Golgi vesicle transport;GO:0065003	gi|48146107|emb|CAG33276.1|/8.47558e-38/VAMP5 [Homo sapiens]
8111	2880	16	44	0.175951190464113	0.622290459652291	1.82241285318998	Up	3.83946e-06	1.37414296702407e-05	GPR68	1	GO:0016021//integral to membrane	GO:0004888//transmembrane signaling receptor activity	GO:0006952//defense response;GO:0007166//cell surface receptor signaling pathway	gi|47834444|gb|AAT38917.1|/0/ovarian cancer G protein-coupled receptor 1 [Homo sapiens]
259307	2417	15	41	0.196552839988872	0.690939721252327	1.81364264356226	Up	8.87206e-06	3.03178700907862e-05	IL4I1	1	GO:0000323//lytic vacuole	GO:0016641//oxidoreductase activity, acting on the CH-NH2 group of donors, oxygen as acceptor	GO:0006520//cellular amino acid metabolic process;GO:0008152//metabolic process	gi|18676542|dbj|BAB84923.1|/0/FLJ00168 protein [Homo sapiens]//gi|27477089|ref|NP_758962.1|/0/L-amino-acid oxidase isoform 2 precursor [Homo sapiens]
4868	5024	75	204	0.472798780108583	1.6539161608593	1.8065878860283	Up	3.08684e-23	3.23706499347955e-22	NPHS1	3	GO:0005626//insoluble fraction;GO:0016021//integral to membrane;GO:0032991//macromolecular complex	GO:0042805//actinin binding	GO:0000165//MAPK cascade;GO:0003008;GO:0048513//organ development	gi|4758822|ref|NP_004637.1|/0/nephrin precursor [Homo sapiens]
51364	1780	14	38	0.249099438185148	0.869553982435479	1.80355382593867	Up	2.05436e-05	6.73654916774791e-05	ZMYND10	2	GO:0044424//intracellular part	GO:0046914//transition metal ion binding	-	gi|37594444|ref|NP_056980.2|/0/zinc finger MYND domain-containing protein 10 [Homo sapiens]
326624	3091	14	38	0.143447751526873	0.500746065588856	1.80355382593867	Up	2.05436e-05	6.73530073387695e-05	RAB37	1	GO:0016023//cytoplasmic membrane-bounded vesicle	GO:0032561//guanyl ribonucleotide binding	GO:0006810//transport;GO:0035556//intracellular signal transduction	gi|255683305|ref|NP_001157461.1|/7.34775e-126/ras-related protein Rab-37 isoform 4 [Homo sapiens] //gi|255683308|ref|NP_001157462.1|/1.47064e-101/ras-related protein Rab-37 isoform 5 [Homo sapiens] //gi|28376635|ref|NP_783865.1|/4.27629e-119/ras-related protein Rab-37 isoform 3 [Homo sapiens]//gi|54859685|ref|NP_001006639.1|/1.43717e-123/ras-related protein Rab-37 isoform 2 [Homo sapiens]
654346	1743	10	27	0.181705188086863	0.630956372797191	1.7959406418288	Up	0.000356282	0.000993534814312737	LGALS9C	2	GO:0044424//intracellular part	GO:0048029//monosaccharide binding;GO:0060089	GO:0007249//I-kappaB kinase/NF-kappaB cascade	gi|111494239|ref|NP_001035167.2|/0/galectin-9C [Homo sapiens]
166824	6040	10	27	0.0524357852376495	0.182078966520779	1.7959406418288	Up	0.000356282	0.000993378228841608	RASSF6	1	-	GO:0005488//binding	GO:0006915//apoptotic process;GO:0023052//signaling	gi|393715063|ref|NP_001257321.1|/0/ras association domain-containing protein 6 isoform d [Homo sapiens]//gi|41393610|ref|NP_958834.1|/0/ras association domain-containing protein 6 isoform b [Homo sapiens]//gi|41393610|ref|NP_958834.1|/1.04183e-172/ras association domain-containing protein 6 isoform b [Homo sapiens]
6773	4576	2005	5407	13.8769197199515	48.128608769961	1.79420735429241	Up	0	0	STAT2	1	GO:0016020//membrane;GO:0031981//nuclear lumen;GO:0044444//cytoplasmic part	GO:0001071//nucleic acid binding transcription factor activity;GO:0003676//nucleic acid binding;GO:0046872//metal ion binding;GO:0060089	GO:0001959//regulation of cytokine-mediated signaling pathway;GO:0006355//regulation of transcription, DNA-dependent;GO:0007243//intracellular protein kinase cascade;GO:0051707//response to other organism	gi|291219924|ref|NP_938146.1|/0/signal transducer and activator of transcription 2 isoform 2 [Homo sapiens]//gi|4885615|ref|NP_005410.1|/0/signal transducer and activator of transcription 2 isoform 1 [Homo sapiens]
6288	678	70	188	3.26988938030652	11.2943465565211	1.78828706928536	Up	2.97206e-21	2.91133518604651e-20	SAA1	1	GO:0034358//plasma lipoprotein particle	GO:0005102//receptor binding	GO:0001775//cell activation;GO:0002526//acute inflammatory response;GO:0030155//regulation of cell adhesion;GO:0030595//leukocyte chemotaxis;GO:0031348//negative regulation of defense response;GO:0032732//positive regulation of interleukin-1 production;GO:0050707//regulation of cytokine secretion;GO:0051480//cytosolic calcium ion homeostasis	gi|40316910|ref|NP_954630.1|/2.74828e-67/serum amyloid A-1 protein preproprotein [Homo sapiens]//gi|40316910|ref|NP_954630.1|/3.63885e-67/serum amyloid A-1 protein preproprotein [Homo sapiens]//gi|40316910|ref|NP_954630.1|/4.90079e-67/serum amyloid A-1 protein preproprotein [Homo sapiens]
3669	974	214	574	6.95856248118852	24.0041255520906	1.78642117482723	Up	1.946302e-61	5.28098599417178e-60	ISG20	4	GO:0016604//nuclear body	GO:0003676//nucleic acid binding;GO:0008296//3'-5'-exodeoxyribonuclease activity;GO:0043169//cation binding	GO:0006308//DNA catabolic process;GO:0016070//RNA metabolic process;GO:0019221//cytokine-mediated signaling pathway;GO:0051707//response to other organism	gi|58177183|pdb|1WLJ|A/1.04469e-89/Chain A, Human Isg20
54847	5021	28	75	0.176617008551908	0.608420720631959	1.78444500299096	Up	2.56758e-09	1.23298202442997e-08	SIDT1	2	GO:0031224//intrinsic to membrane	-	-	gi|116812584|ref|NP_060169.2|/0/SID1 transmembrane family member 1 precursor [Homo sapiens]
339541	1698	37	99	0.690126577438746	2.37481871528083	1.78288448900335	Up	7.63762e-12	4.42571684965608e-11	C1orf228	1	-	-	-	gi|224500884|ref|NP_001139108.1|/0/uncharacterized protein C1orf228 [Homo sapiens]
1014	2986	21	56	0.222737943722152	0.763890620872568	1.77801873383153	Up	2.91142e-07	1.17005750159019e-06	CDH16	1	GO:0016020//membrane;GO:0031224//intrinsic to membrane	GO:0046872//metal ion binding	GO:0007155//cell adhesion;GO:0016337//cell-cell adhesion	gi|325296969|ref|NP_001191673.1|/0/cadherin-16 isoform 2 precursor [Homo sapiens]//gi|325296973|ref|NP_001191674.1|/0/cadherin-16 isoform 3 precursor [Homo sapiens] //gi|325296975|ref|NP_001191675.1|/0/cadherin-16 isoform 4 precursor [Homo sapiens]//gi|4757956|ref|NP_004053.1|/0/cadherin-16 isoform 1 precursor [Homo sapiens]
135932	2161	18	48	0.263804653911951	0.904730902594892	1.77801873383153	Up	2.0816e-06	7.64174841253372e-06	TMEM139	1	GO:0031224//intrinsic to membrane	-	-	gi|23503271|ref|NP_699176.1|/2.04529e-74/transmembrane protein 139 isoform a precursor [Homo sapiens]//gi|23503271|ref|NP_699176.1|/3.08395e-93/transmembrane protein 139 isoform a precursor [Homo sapiens]//gi|23503271|ref|NP_699176.1|/3.25861e-93/transmembrane protein 139 isoform a precursor [Homo sapiens]//gi|23503271|ref|NP_699176.1|/3.30662e-93/transmembrane protein 139 isoform a precursor [Ho…
25837	1641	171	454	3.30029106793747	11.2688662927894	1.77167720695771	Up	2.06622e-48	4.43072703272727e-47	RAB26	4	GO:0031224//intrinsic to membrane	GO:0017111//nucleoside-triphosphatase activity;GO:0032561//guanyl ribonucleotide binding	GO:0006887//exocytosis;GO:0009207;GO:0035556//intracellular signal transduction;GO:0048731	gi|46361978|ref|NP_055168.2|/8.13637e-129/ras-related protein Rab-26 [Homo sapiens]
9246	1642	1048	2777	20.2140271432096	68.8867476828245	1.76886969483409	Up	6.2528e-286	7.47420843243243e-284	UBE2L6	2	GO:0044444//cytoplasmic part	GO:0019787//small conjugating protein ligase activity;GO:0032559	GO:0001818//negative regulation of cytokine production;GO:0032446//protein modification by small protein conjugation;GO:0051603//proteolysis involved in cellular protein catabolic process	gi|119594161|gb|EAW73755.1|/7.42762e-98/ubiquitin-conjugating enzyme E2L 6, isoform CRA_a [Homo sapiens]//gi|4759282|ref|NP_004214.1|/1.05234e-85/ubiquitin/ISG15-conjugating enzyme E2 L6 isoform 1 [Homo sapiens]
10410	678	605	1601	28.2611867869349	96.1821746648416	1.76694749490699	Up	1.835948e-165	1.2444350983908e-163	IFITM3	1	GO:0031224//intrinsic to membrane	-	GO:0002376//immune system process;GO:0006952//defense response;GO:0019221//cytokine-mediated signaling pathway;GO:0051707//response to other organism	gi|148612842|ref|NP_066362.2|/1.79985e-58/interferon-induced transmembrane protein 3 [Homo sapiens]//gi|148612842|ref|NP_066362.2|/8.6507e-64/interferon-induced transmembrane protein 3 [Homo sapiens]
650669	902	22	58	0.772468641061958	2.61911404909088	1.76153061104297	Up	2.14184e-07	8.70663865808823e-07	GAS6-AS1	2	GO:0031091//platelet alpha granule;GO:0044421//extracellular region part;GO:0044431//Golgi apparatus part;GO:0044432//endoplasmic reticulum part	GO:0005102//receptor binding;GO:0046872//metal ion binding	GO:0001775//cell activation;GO:0002376//immune system process;GO:0006887//exocytosis;GO:0007599//hemostasis;GO:0008284//positive regulation of cell proliferation;GO:0018200;GO:0043410//positive regulation of MAPK cascade	gi|194381760|dbj|BAG64249.1|/2.71773e-17/unnamed protein product [Homo sapiens]
54550	1636	35	92	0.677562652765226	2.29053789994264	1.75726017366474	Up	6.54888e-11	3.57360382726712e-10	NECAB2	2	GO:0044424//intracellular part	GO:0003824//catalytic activity;GO:0046872//metal ion binding	GO:0016999//antibiotic metabolic process	gi|32129214|ref|NP_061938.2|/0/N-terminal EF-hand calcium-binding protein 2 [Homo sapiens]
10900	2047	24	63	0.371328355058606	1.25359040946076	1.75529865733145	Up	6.9005e-08	2.94586741071429e-07	RUNDC3A	1	GO:0016020//membrane;GO:0044444//cytoplasmic part	GO:0008047//enzyme activator activity;GO:0030695//GTPase regulator activity;GO:0051427	GO:0006182//cGMP biosynthetic process;GO:0035556//intracellular signal transduction	gi|62089190|dbj|BAD93039.1|/0/RaP2 interacting protein 8 variant [Homo sapiens]
1958	3136	37	97	0.373671852197382	1.25987841205114	1.75344071111087	Up	2.13736e-11	1.20190832040687e-10	EGR1	2	GO:0043231//intracellular membrane-bounded organelle	GO:0001071//nucleic acid binding transcription factor activity;GO:0003677//DNA binding;GO:0046914//transition metal ion binding	GO:0016925//protein sumoylation;GO:0019221//cytokine-mediated signaling pathway;GO:0071398//cellular response to fatty acid;GO:0072126//positive regulation of glomerular mesangial cell proliferation	gi|4503493|ref|NP_001955.1|/0/early growth response protein 1 [Homo sapiens]
441108	822	32	83	1.23294264850765	4.1128155130304	1.73802066589961	Up	7.59386e-10	3.81114829106383e-09	C5orf56	1	-	-	-	gi|172045778|sp|Q8N8D9.2|CE056_HUMAN/1.6302e-10/RecName: Full=Uncharacterized protein C5orf56
63940	1472	12	31	0.258189246876687	0.857801572346784	1.73221504421841	Up	0.0001879714	0.000545684613948146	GPSM3	1	-	GO:0005488//binding	-	gi|5578775|emb|CAB51287.1|/1.50488e-54/G18.1a protein [Homo sapiens]
6337	3497	304	782	2.75323109585252	9.10844153177076	1.72607851841645	Up	3.50404e-79	1.19211483923077e-77	SCNN1A	1	GO:0005626//insoluble fraction;GO:0009986//cell surface;GO:0015629//actin cytoskeleton;GO:0034703//cation channel complex;GO:0044459//plasma membrane part	GO:0005272//sodium channel activity;GO:0008092//cytoskeletal protein binding;GO:0019904//protein domain specific binding	GO:0006814//sodium ion transport;GO:0007606//sensory perception of chemical stimulus;GO:0008015//blood circulation	gi|227430287|ref|NP_001153047.1|/0/amiloride-sensitive sodium channel subunit alpha isoform 3 [Homo sapiens] //gi|227430289|ref|NP_001153048.1|/0/amiloride-sensitive sodium channel subunit alpha isoform 2 [Homo sapiens]
388323	1239	18	46	0.460114493223346	1.51223567566835	1.71661818916739	Up	5.87408e-06	2.05088512492599e-05	GLTPD2	2	-	-	-	gi|304571945|ref|NP_001014985.2|/5.77267e-134/glycolipid transfer protein domain-containing protein 2 precursor [Homo sapiens]
2635	3051	209	533	2.16954565233036	7.11570533643703	1.71361382523098	Up	5.36048e-54	1.28848168043478e-52	GBP3	2	GO:0031224//intrinsic to membrane	GO:0017111//nucleoside-triphosphatase activity;GO:0032561//guanyl ribonucleotide binding	GO:0019221//cytokine-mediated signaling pathway	gi|112382372|ref|NP_060754.2|/0/guanylate-binding protein 3 [Homo sapiens]
91351	6754	1338	3407	6.27422041921482	20.5467923270447	1.71140506600758	Up	0	0	DDX60L	1	-	GO:0003676//nucleic acid binding;GO:0032559;GO:0042623//ATPase activity, coupled	-	gi|149274648|ref|NP_001012985.1|/0/probable ATP-dependent RNA helicase DDX60-like [Homo sapiens]
6819	2832	13	33	0.145383398900432	0.474628316683951	1.70693563577005	Up	0.0001361336	0.000402867098962864	SULT1C2	2	GO:0005856//cytoskeleton;GO:0044444//cytoplasmic part	GO:0016782//transferase activity, transferring sulfur-containing groups	GO:0006790//sulfur compound metabolic process;GO:0006807//nitrogen compound metabolic process	gi|29029530|ref|NP_789795.1|/3.23656e-174/sulfotransferase 1C2 isoform b [Homo sapiens]//gi|4507305|ref|NP_001047.1|/1.53095e-176/sulfotransferase 1C2 isoform a [Homo sapiens]
440452	2086	13	33	0.197375736186972	0.644365960138518	1.70693563577005	Up	0.0001361336	0.000402799718615153	TBC1D3P2	1	GO:0044464//cell part	GO:0005099//Ras GTPase activator activity	GO:0032318//regulation of Ras GTPase activity	gi|114669782|ref|XP_001138309.1|/0/PREDICTED: TBC1 domain family member 3G [Pan troglodytes]
11277	1835	411	1042	7.09366161882019	23.1294126554142	1.70512621314952	Up	4.2142e-103	1.84538149009901e-101	TREX1	2	GO:0012505//endomembrane system;GO:0043231//intracellular membrane-bounded organelle	GO:0008408//3'-5' exonuclease activity;GO:0016895//exodeoxyribonuclease activity, producing 5'-phosphomonoesters;GO:0030554//adenyl nucleotide binding;GO:0032404;GO:0042802//identical protein binding;GO:0043169//cation binding;GO:0043566//structure-specific DNA binding	GO:0006281//DNA repair	gi|7705353|ref|NP_057465.1|/4.90571e-141/three prime repair exonuclease 1 isoform a [Homo sapiens]//gi|7705353|ref|NP_057465.1|/7.11188e-161/three prime repair exonuclease 1 isoform a [Homo sapiens]
29933	3652	44	111	0.381580894982413	1.23801288298843	1.6979654822655	Up	2.50062e-12	1.4970716893401e-11	GPR132	2	GO:0016021//integral to membrane	GO:0004888//transmembrane signaling receptor activity	GO:0022402//cell cycle process;GO:0050896//response to stimulus	gi|7019387|ref|NP_037477.1|/0/probable G-protein coupled receptor 132 [Homo sapiens]
3659	3567	1122	2820	9.96218178473008	32.2017113764562	1.69260372123005	Up	9.48268e-273	1.05508233886792e-270	IRF1	2	GO:0031981//nuclear lumen	GO:0001071//nucleic acid binding transcription factor activity;GO:0003677//DNA binding	GO:0006357//regulation of transcription from RNA polymerase II promoter;GO:0007599//hemostasis;GO:0009612//response to mechanical stimulus;GO:0019221//cytokine-mediated signaling pathway;GO:0042108//positive regulation of cytokine biosynthetic process;GO:0046632//alpha-beta T cell differentiation	gi|4504721|ref|NP_002189.1|/9.64697e-171/interferon regulatory factor 1 [Homo sapiens]
284076	3454	39	98	0.357607804591219	1.15567760259687	1.69228885980564	Up	5.27714e-11	2.89481810046512e-10	TTLL6	1	GO:0005815//microtubule organizing center;GO:0042995//cell projection	GO:0003824//catalytic activity;GO:0008092//cytoskeletal protein binding;GO:0032559	GO:0043412//macromolecule modification	gi|195963416|ref|NP_775894.2|/0/tubulin polyglutamylase TTLL6 isoform 2 [Homo sapiens]//gi|195963418|ref|NP_001124390.1|/0/tubulin polyglutamylase TTLL6 isoform 1 [Homo sapiens]
29948	1958	434	1080	7.02007507612691	22.4669450007253	1.67824559915904	Up	2.02376e-104	8.97301708270677e-103	OSGIN1	2	-	GO:0005102//receptor binding	GO:0016049//cell growth;GO:0032501//multicellular organismal process;GO:0048869//cellular developmental process;GO:0050789//regulation of biological process	gi|119615918|gb|EAW95512.1|/0/pregnancy-induced growth inhibitor, isoform CRA_b [Homo sapiens]
24138	4034	582	1442	4.56932243753606	14.5600317039121	1.67196134088523	Up	4.94244e-138	2.83885409220779e-136	IFIT5	2	-	-	-	gi|6912630|ref|NP_036552.1|/0/interferon-induced protein with tetratricopeptide repeats 5 [Homo sapiens]
353345	918	15	37	0.517503501365037	1.64169319123956	1.66554400457313	Up	7.11382e-05	0.000218566498124349	GPR141	1	GO:0031224//intrinsic to membrane	GO:0004888//transmembrane signaling receptor activity	GO:0007166//cell surface receptor signaling pathway	gi|32401435|ref|NP_861456.1|/2.61434e-156/probable G-protein coupled receptor 141 [Homo sapiens]
1048	3600	15	37	0.131963392848085	0.418631763766087	1.66554400457312	Up	7.11382e-05	0.000218528545962841	CEACAM5	2	GO:0016021//integral to membrane;GO:0044459//plasma membrane part	-	-	gi|98986445|ref|NP_004354.2|/0/carcinoembryonic antigen-related cell adhesion molecule 5 preproprotein [Homo sapiens]
3620	1944	26	64	0.423586199265456	1.34096260665814	1.6625415164116	Up	1.691972e-07	6.94977400789413e-07	IDO1	5	GO:0044444//cytoplasmic part	GO:0005506//iron ion binding;GO:0016702//oxidoreductase activity, acting on single donors with incorporation of molecular oxygen, incorporation of two atoms of oxygen	GO:0001818//negative regulation of cytokine production;GO:0001819//positive regulation of cytokine production;GO:0002237//response to molecule of bacterial origin;GO:0002517//T cell tolerance induction;GO:0002544//chronic inflammatory response;GO:0002828//regulation of type 2 immune response;GO:0006569//tryptophan catabolic process;GO:0018130;GO:0022414//reproductive process;GO:0042130//negative …	gi|88192727|pdb|2D0T|A/0/Chain A, Crystal Structure Of 4-Phenylimidazole Bound Form Of Human Indoleamine 2,3-Dioxygenase
253018	1742	13	32	0.236352345399554	0.748229422314413	1.6625415164116	Up	0.000227562	0.000651318450412555	HCG27	1	-	-	-	gi|119623777|gb|EAX03372.1|/5.95253e-101/HLA complex group 27, isoform CRA_c [Homo sapiens]
2323	1125	42	103	1.18239199991884	3.72921700911627	1.65716433895714	Up	3.40024e-11	1.88865450047096e-10	FLT3LG	3	GO:0000267//cell fraction;GO:0031224//intrinsic to membrane;GO:0044421//extracellular region part	GO:0005102//receptor binding	GO:0008283//cell proliferation;GO:0023052//signaling	gi|219841754|gb|AAI44130.1|/1.42685e-106/FLT3LG protein [Homo sapiens]//gi|219841754|gb|AAI44130.1|/1.45962e-106/FLT3LG protein [Homo sapiens]//gi|219841754|gb|AAI44130.1|/1.52281e-106/FLT3LG protein [Homo sapiens]
432	1519	31	76	0.646351311908985	2.03792770077044	1.6567124376094	Up	1.283928e-08	5.84056833324762e-08	ASGR1	2	GO:0016021//integral to membrane	GO:0004888//transmembrane signaling receptor activity;GO:0030246//carbohydrate binding;GO:0042802//identical protein binding;GO:0043169//cation binding	GO:0006897//endocytosis;GO:0007154//cell communication	gi|308387363|ref|NP_001184145.1|/7.8227e-146/asialoglycoprotein receptor 1 isoform b [Homo sapiens]//gi|4502251|ref|NP_001662.1|/9.60381e-145/asialoglycoprotein receptor 1 isoform a [Homo sapiens]
10814	4726	6222	15135	41.6966346322868	130.443265435366	1.64541960973318	Up	0	0	CPLX2	1	GO:0031201//SNARE complex;GO:0043005//neuron projection;GO:0044297//cell body;GO:0044444//cytoplasmic part	GO:0019905//syntaxin binding;GO:0022857//transmembrane transporter activity	GO:0001505//regulation of neurotransmitter levels;GO:0006887//exocytosis;GO:0030072//peptide hormone secretion	gi|119581772|gb|EAW61368.1|/5.2296e-71/hCG1978847 [Homo sapiens]//gi|119581772|gb|EAW61368.1|/5.28882e-71/hCG1978847 [Homo sapiens]
100130771	791	14	34	0.560552465195403	1.75079536286497	1.64308915374543	Up	0.0001637632	0.000480135030029831	EFCAB10	1	-	GO:0019887//protein kinase regulator activity;GO:0046872//metal ion binding	GO:0016310//phosphorylation;GO:0019222//regulation of metabolic process;GO:0023052//signaling	gi|190461801|sp|A6NFE3.2|EFC10_HUMAN/6.22757e-65/RecName: Full=EF-hand calcium-binding domain-containing protein 10
27063	1994	41	99	0.651213533412814	2.02228795313282	1.63478585001421	Up	1.243822e-10	6.63384232800724e-10	ANKRD1	2	GO:0030017//sarcomere;GO:0043231//intracellular membrane-bounded organelle;GO:0043234//protein complex	GO:0003676//nucleic acid binding;GO:0003712//transcription cofactor activity	GO:0006355//regulation of transcription, DNA-dependent;GO:0006629//lipid metabolic process;GO:0006950//response to stress;GO:0023052//signaling	gi|38327522|ref|NP_055206.2|/7.13661e-170/ankyrin repeat domain-containing protein 1 [Homo sapiens]
59352	3458	107	258	0.979994195586701	3.03897880501103	1.6327415035748	Up	2.74014e-25	3.12545562475822e-24	LGR6	1	GO:0031224//intrinsic to membrane	GO:0004930//G-protein coupled receptor activity	GO:0007165//signal transduction;GO:0007166//cell surface receptor signaling pathway	gi|62912470|ref|NP_001017403.1|/0/leucine-rich repeat-containing G-protein coupled receptor 6 isoform 1 precursor [Homo sapiens]//gi|62912472|ref|NP_067649.2|/0/leucine-rich repeat-containing G-protein coupled receptor 6 isoform 2 [Homo sapiens]//gi|62912474|ref|NP_001017404.1|/0/leucine-rich repeat-containing G-protein coupled receptor 6 isoform 3 [Homo sapiens]
10103	1639	76	183	1.46858589722334	4.54783909056442	1.63075355939315	Up	2.32716e-18	1.97267788979396e-17	TSPAN1	3	GO:0005764//lysosome;GO:0031224//intrinsic to membrane	-	-	gi|21264578|ref|NP_005718.2|/7.16094e-109/tetraspanin-1 [Homo sapiens]
619207	4918	28	67	0.18031598209417	0.554905759429674	1.62171550295286	Up	1.465336e-07	6.05966787657784e-07	LOC619207	2	-	-	-	gi|297302138|ref|XP_001093501.2|/0/PREDICTED: scavenger receptor cysteine-rich type 1 protein M160-like [Macaca mulatta]
401944	4012	23	55	0.181564787767055	0.558386254922295	1.62077899202034	Up	1.957868e-06	7.20695854931336e-06	LDLRAD2	2	GO:0031224//intrinsic to membrane	GO:0004871//signal transducer activity	-	gi|224591414|ref|NP_001013715.2|/2.01625e-140/low-density lipoprotein receptor class A domain-containing protein 2 precursor [Homo sapiens]
100131096	3189	27	64	0.268147627988582	0.817444749872504	1.60809373238922	Up	3.29678e-07	1.31893566214383e-06	LOC100131096	1	-	-	-	gi|37547457|gb|AAM98767.1|/1.77271e-59/unknown [Homo sapiens]
112609	2229	39	92	0.554139684637986	1.68116644428271	1.60114097174745	Up	1.009102e-09	5.01179772094329e-09	MRAP2	2	GO:0016020//membrane;GO:0043231//intracellular membrane-bounded organelle	GO:0031779//melanocortin receptor binding	GO:0006171//cAMP biosynthetic process;GO:0034613//cellular protein localization	gi|156523251|ref|NP_612418.2|/4.85688e-114/melanocortin-2 receptor accessory protein 2 [Homo sapiens]
2877	1311	1339	3157	32.3476399127845	98.0855076907318	1.60037953454136	Up	2.26856e-281	2.65782085827814e-279	GPX2	3	GO:0044424//intracellular part;GO:0044444//cytoplasmic part	GO:0004601//peroxidase activity	GO:0002437//inflammatory response to antigenic stimulus;GO:0008152//metabolic process;GO:0009608//response to symbiont;GO:0044419//interspecies interaction between organisms;GO:0048871//multicellular organismal homeostasis	gi|119601295|gb|EAW80889.1|/3.98297e-64/glutathione peroxidase 2 (gastrointestinal) [Homo sapiens]//gi|119601295|gb|EAW80889.1|/5.20192e-64/glutathione peroxidase 2 (gastrointestinal) [Homo sapiens]//gi|579930|emb|CAA48394.1|/2.28112e-107/glutathione peroxidase-GI [Homo sapiens]
8468	1570	17	40	0.342936715172092	1.0377513166176	1.59744648818971	Up	6.08858e-05	0.000188540291930684	FKBP6	1	GO:0044464//cell part	GO:0005527//macrolide binding;GO:0016859//cis-trans isomerase activity	GO:0018193//peptidyl-amino acid modification	gi|146229346|ref|NP_003593.3|/0/peptidyl-prolyl cis-trans isomerase FKBP6 isoform a [Homo sapiens]//gi|206725544|ref|NP_001128683.1|/0/peptidyl-prolyl cis-trans isomerase FKBP6 isoform b [Homo sapiens]
6772	4326	6609	15530	48.3853571890702	146.223742353803	1.59553516340532	Up	0	0	STAT1	3	GO:0031981//nuclear lumen;GO:0043005//neuron projection;GO:0044444//cytoplasmic part	GO:0001071//nucleic acid binding transcription factor activity;GO:0003677//DNA binding;GO:0046872//metal ion binding;GO:0060089	GO:0000302//response to reactive oxygen species;GO:0001959//regulation of cytokine-mediated signaling pathway;GO:0002237//response to molecule of bacterial origin;GO:0003013;GO:0006351//transcription, DNA-dependent;GO:0006915//apoptotic process;GO:0007243//intracellular protein kinase cascade;GO:0008284//positive regulation of cell proliferation;GO:0012502//induction of programmed cell death;GO:0…	gi|21536301|ref|NP_644671.1|/0/signal transducer and activator of transcription 1-alpha/beta isoform beta [Homo sapiens]//gi|6274552|ref|NP_009330.1|/0/signal transducer and activator of transcription 1-alpha/beta isoform alpha [Homo sapiens]
26287	1462	24	56	0.519910494394642	1.56017605603659	1.58537365588914	Up	2.30812e-06	8.43481737657509e-06	ANKRD2	2	GO:0030017//sarcomere	GO:0005198//structural molecule activity	GO:0003012//muscle system process;GO:0048513//organ development	gi|34915797|emb|CAE47432.1|/0/ankyrin repeat protein [Homo sapiens]
5699	1019	552	1285	17.1565360986401	51.3643619654117	1.58200942185576	Up	8.37374e-114	4.02553897663043e-112	PSMB10	3	GO:0000502//proteasome complex;GO:0043231//intracellular membrane-bounded organelle	GO:0004175//endopeptidase activity	GO:0006520//cellular amino acid metabolic process;GO:0006915//apoptotic process;GO:0006955//immune response;GO:0007050//cell cycle arrest;GO:0016070//RNA metabolic process;GO:0030330//DNA damage response, signal transduction by p53 class mediator;GO:0043161//proteasomal ubiquitin-dependent protein catabolic process;GO:0051320//S phase;GO:0051439//regulation of ubiquitin-protein ligase activity in…	gi|4506191|ref|NP_002792.1|/8.41061e-146/proteasome subunit beta type-10 precursor [Homo sapiens]
84106	2235	28	65	0.396775838898939	1.18459196712334	1.57799412552354	Up	3.87552e-07	1.53760538954923e-06	PRAM1	4	-	GO:0005488//binding	-	gi|302318952|ref|NP_115528.4|/0/PML-RARA-regulated adapter molecule 1 [Homo sapiens]
147138	4419	25	58	0.179176365034738	0.534609837583157	1.57710603990554	Up	1.66616e-06	6.17169944723618e-06	TMC8	4	GO:0031090//organelle membrane;GO:0031224//intrinsic to membrane;GO:0043231//intracellular membrane-bounded organelle	-	-	gi|21748644|dbj|BAC03459.1|/0/FLJ00400 protein [Homo sapiens]
4151	1170	110	253	2.97763553093114	8.80780342892473	1.56461509572234	Up	2.01918e-23	2.13900080119761e-22	MB	1	-	GO:0005506//iron ion binding;GO:0022892	GO:0000302//response to reactive oxygen species;GO:0009719;GO:0014721;GO:0015669//gas transport;GO:0030218//erythrocyte differentiation;GO:0045444//fat cell differentiation	gi|119580469|gb|EAW60065.1|/4.79323e-86/myoglobin, isoform CRA_a [Homo sapiens]//gi|119580469|gb|EAW60065.1|/5.28312e-86/myoglobin, isoform CRA_a [Homo sapiens]//gi|119580469|gb|EAW60065.1|/5.40992e-86/myoglobin, isoform CRA_a [Homo sapiens]
51251	1932	717	1649	11.7537580959101	34.765340529643	1.56452760928826	Up	3.78712e-143	2.24073377658863e-141	NT5C3	2	GO:0043231//intracellular membrane-bounded organelle;GO:0044444//cytoplasmic part	GO:0008252//nucleotidase activity;GO:0016740//transferase activity;GO:0046872//metal ion binding	GO:0006213//pyrimidine nucleoside metabolic process;GO:0006753//nucleoside phosphate metabolic process;GO:0006796//phosphate-containing compound metabolic process;GO:0009112;GO:0046128	gi|70608080|ref|NP_001002009.1|/3.09254e-163/cytosolic 5'-nucleotidase 3 isoform 2 [Homo sapiens]//gi|70608080|ref|NP_001002009.1|/4.638e-168/cytosolic 5'-nucleotidase 3 isoform 2 [Homo sapiens]//gi|70608082|ref|NP_001002010.1|/1.98098e-173/cytosolic 5'-nucleotidase 3 isoform 1 [Homo sapiens]//gi|70608082|ref|NP_001002010.1|/7.85983e-169/cytosolic 5'-nucleotidase 3 isoform 1 [Homo sapiens]
152742	1998	18	41	0.285326254806669	0.835836489623061	1.55060823772846	Up	7.12234e-05	0.000218752286354167	LOC152742	1	-	-	-	gi|119613126|gb|EAW92720.1|/1.21747e-60/hCG2039071 [Homo sapiens]
84258	2928	29	66	0.313683474802824	0.918133465060757	1.54939435878357	Up	4.51956e-07	1.78273212842809e-06	SYT3	1	GO:0008021//synaptic vesicle;GO:0031224//intrinsic to membrane;GO:0044459//plasma membrane part	GO:0000149//SNARE binding;GO:0005543//phospholipid binding;GO:0043169//cation binding	GO:0051234//establishment of localization	gi|14150054|ref|NP_115674.1|/0/synaptotagmin-3 [Homo sapiens]
100130311	3099	22	50	0.224835983942525	0.657175527222344	1.54740580569012	Up	1.16798e-05	3.92603727531826e-05	C17orf107	1	GO:0005887//integral to plasma membrane	GO:0004888//transmembrane signaling receptor activity;GO:0005230//extracellular ligand-gated ion channel activity	GO:0003012//muscle system process;GO:0006811//ion transport;GO:0007268//synaptic transmission;GO:0065007//biological regulation	gi|224493723|ref|NP_001139008.1|/9.05111e-77/uncharacterized protein C17orf107 [Homo sapiens]
6890	2974	1216	2750	12.9496289740366	37.663847591598	1.54026962440849	Up	5.71788e-232	5.55796786153846e-230	TAP1	5	GO:0042598;GO:0042824//MHC class I peptide loading complex	GO:0003823//antigen binding;GO:0015440//peptide-transporting ATPase activity;GO:0032559;GO:0042287//MHC protein binding;GO:0042802//identical protein binding;GO:0046977;GO:0046983//protein dimerization activity	GO:0001912//positive regulation of leukocyte mediated cytotoxicity;GO:0002474//antigen processing and presentation of peptide antigen via MHC class I;GO:0022415;GO:0045953//negative regulation of natural killer cell mediated cytotoxicity;GO:0046907//intracellular transport;GO:0051704	gi|9665248|ref|NP_000584.2|/0/antigen peptide transporter 1 [Homo sapiens]
638	966	16	36	0.524574977781206	1.51795301281643	1.532906235995	Up	0.000225676	0.000646234075105212	BIK	4	GO:0031224//intrinsic to membrane;GO:0031967	GO:0019904//protein domain specific binding;GO:0046983//protein dimerization activity	GO:0001836//release of cytochrome c from mitochondria;GO:0008406//gonad development;GO:0012502//induction of programmed cell death;GO:0032461//positive regulation of protein oligomerization;GO:0048232//male gamete generation	gi|4502411|ref|NP_001188.1|/4.36384e-72/bcl-2-interacting killer [Homo sapiens]
64167	5691	97	218	0.539818623353261	1.56027396602328	1.53125271714248	Up	8.34564e-20	7.59478998148148e-19	ERAP2	1	GO:0031090//organelle membrane;GO:0031224//intrinsic to membrane;GO:0044432//endoplasmic reticulum part	GO:0008238//exopeptidase activity;GO:0046914//transition metal ion binding	GO:0002474//antigen processing and presentation of peptide antigen via MHC class I;GO:0008015//blood circulation;GO:0019538//protein metabolic process	gi|11641261|ref|NP_071745.1|/0/endoplasmic reticulum aminopeptidase 2 [Homo sapiens]
400745	3834	230	516	1.89994243224159	5.48189290961301	1.52871843903157	Up	1.488532e-44	2.92595773466667e-43	SH2D5	1	-	-	-	gi|156938287|ref|NP_001096631.1|/0/SH2 domain-containing protein 5 isoform 1 [Homo sapiens]//gi|56206915|emb|CAI23392.1|/0/SH2 domain containing 5 [Homo sapiens]
12	1629	177	397	3.44125532730917	9.92664239003353	1.52837088161265	Up	1.168072e-34	1.79846490443864e-33	SERPINA3	4	GO:0043231//intracellular membrane-bounded organelle	GO:0003676//nucleic acid binding;GO:0004866//endopeptidase inhibitor activity	GO:0002526//acute inflammatory response;GO:0006508//proteolysis;GO:0006629//lipid metabolic process;GO:0010466//negative regulation of peptidase activity;GO:0010669//epithelial structure maintenance	gi|193787435|dbj|BAG52641.1|/0/unnamed protein product [Homo sapiens]
5266	579	27	60	1.47689600285939	4.22090561422185	1.51498432799774	Up	2.24462e-06	8.21294155532575e-06	PI3	3	GO:0031012//extracellular matrix	GO:0004866//endopeptidase inhibitor activity	GO:0007618//mating;GO:0010466//negative regulation of peptidase activity	gi|4505787|ref|NP_002629.1|/3.05497e-63/elafin preproprotein [Homo sapiens]
6737	1946	1033	2292	16.8121091237909	47.9738675201624	1.51274802444453	Up	1.378496e-188	1.11866847412844e-186	TRIM21	3	GO:0030529//ribonucleoprotein complex;GO:0031461//cullin-RING ubiquitin ligase complex;GO:0031981//nuclear lumen	GO:0003676//nucleic acid binding;GO:0019787//small conjugating protein ligase activity;GO:0046914//transition metal ion binding	GO:0016567//protein ubiquitination;GO:0016579//protein deubiquitination;GO:0031647//regulation of protein stability;GO:0043433//negative regulation of sequence-specific DNA binding transcription factor activity;GO:0051259//protein oligomerization;GO:0051726//regulation of cell cycle	gi|15208660|ref|NP_003132.2|/0/E3 ubiquitin-protein ligase TRIM21 [Homo sapiens]
100128071	716	51	113	2.25591051460971	6.42833313830757	1.51073485499638	Up	8.75536e-11	4.73673008440367e-10	LOC100128071	1	-	-	-	gi|266455838|ref|NP_001161148.1|/4.50491e-53/uncharacterized protein LOC100128071 [Homo sapiens]
7706	5744	2422	5336	13.3544012873842	37.8385376479382	1.50254103604294	Up	0	0	TRIM25	4	GO:0005924//cell-substrate adherens junction;GO:0031981//nuclear lumen;GO:0044444//cytoplasmic part	GO:0001071//nucleic acid binding transcription factor activity;GO:0019787//small conjugating protein ligase activity;GO:0046914//transition metal ion binding	GO:0001818//negative regulation of cytokine production;GO:0006952//defense response;GO:0010467//gene expression;GO:0032446//protein modification by small protein conjugation;GO:0051707//response to other organism	gi|62087568|dbj|BAD92231.1|/0/tripartite motif-containing 25 variant [Homo sapiens]
28514	3366	21	46	0.197592245975742	0.556642900223731	1.49422576783094	Up	4.2127e-05	0.000133226449231319	DLL1	3	GO:0016021//integral to membrane;GO:0031982//vesicle	GO:0005102//receptor binding;GO:0046872//metal ion binding	GO:0001756//somitogenesis;GO:0007155//cell adhesion;GO:0007166//cell surface receptor signaling pathway;GO:0009855//determination of bilateral symmetry;GO:0042471//ear morphogenesis;GO:0042476//odontogenesis;GO:0044267//cellular protein metabolic process;GO:0045165//cell fate commitment;GO:0045607//regulation of auditory receptor cell differentiation;GO:0048534	gi|110735443|ref|NP_005609.3|/0/delta-like protein 1 precursor [Homo sapiens]
284306	2788	29	63	0.329435155747012	0.920408740375242	1.48228016292503	Up	1.849768e-06	6.82323721601335e-06	ZNF547	2	-	GO:0005488//binding	-	gi|390479459|ref|XP_002762586.2|/0/PREDICTED: LOW QUALITY PROTEIN: uncharacterized protein LOC100412703 [Callithrix jacchus]
161145	4068	30	65	0.233563527164751	0.650826707600948	1.47845845197263	Up	1.329206e-06	4.9683041085992e-06	TMEM229B	2	GO:0031224//intrinsic to membrane	-	-	gi|32698890|ref|NP_872332.1|/6.46641e-86/transmembrane protein 229B [Homo sapiens]
2267	1500	192	416	4.05391542829316	11.2962689984881	1.47845845197262	Up	1.46996e-34	2.25347160831889e-33	FGL1	1	GO:0005615//extracellular space	GO:0005515//protein binding	GO:0023052//signaling	gi|42544189|ref|NP_004458.3|/0/fibrinogen-like protein 1 precursor [Homo sapiens]
494514	860	55	119	2.02548463441246	5.63613600243217	1.47643928433597	Up	5.99494e-11	3.27942125974026e-10	C18orf56	2	GO:0000267//cell fraction;GO:0044444//cytoplasmic part	GO:0016597//amino acid binding;GO:0042083//5,10-methylenetetrahydrofolate-dependent methyltransferase activity	GO:0000082//G1/S transition of mitotic cell cycle;GO:0002069;GO:0006213//pyrimidine nucleoside metabolic process;GO:0006259//DNA metabolic process;GO:0009112;GO:0009177;GO:0009887//organ morphogenesis;GO:0017085//response to insecticide;GO:0019087//transformation of host cell by virus;GO:0031960//response to corticosteroid stimulus;GO:0040007//growth;GO:0048017//inositol lipid-mediated signaling	gi|119622128|gb|EAX01723.1|/9.8091e-46/chromosome 18 open reading frame 56 [Homo sapiens]
80761	1625	312	675	6.08087314243973	16.9193378120847	1.47632270762864	Up	6.88792e-55	1.67612369628611e-53	UPK3B	1	GO:0031224//intrinsic to membrane	-	GO:0010467//gene expression	gi|13399330|ref|NP_085047.1|/5.51434e-162/uroplakin-3b isoform a precursor [Homo sapiens]//gi|33149306|ref|NP_872625.1|/3.36323e-145/uroplakin-3b isoform b precursor [Homo sapiens]
4050	894	31	67	1.09821883980956	3.05260237681783	1.47487411462359	Up	9.55344e-07	3.62371155746141e-06	LTB	1	GO:0031224//intrinsic to membrane;GO:0044421//extracellular region part	GO:0032813//tumor necrosis factor receptor superfamily binding	GO:0007154//cell communication;GO:0008544//epidermis development;GO:0023052//signaling;GO:0042108//positive regulation of cytokine biosynthetic process;GO:0048534	gi|4505035|ref|NP_002332.1|/2.2857e-125/lymphotoxin-beta isoform a [Homo sapiens]//gi|4505035|ref|NP_002332.1|/3.34459e-99/lymphotoxin-beta isoform a [Homo sapiens]
114757	2166	19	41	0.277817669153862	0.771007066605206	1.47260572572719	Up	0.0001319238	0.000391390901526077	CYGB	4	GO:0044297//cell body;GO:0044424//intracellular part	GO:0005506//iron ion binding;GO:0016209//antioxidant activity;GO:0022892	GO:0006950//response to stress;GO:0015669//gas transport	gi|148702641|gb|EDL34588.1|/1.11491e-101/cytoglobin [Mus musculus]
8938	4691	68	146	0.45910095316153	1.26771134510279	1.46534295218237	Up	5.62898e-13	3.52254280792359e-12	BAIAP3	1	-	GO:0005515//protein binding	GO:0001505//regulation of neurotransmitter levels;GO:0007166//cell surface receptor signaling pathway	gi|20521145|dbj|BAA34454.2|/0/KIAA0734 protein [Homo sapiens]//gi|312284081|ref|NP_001186025.1|/0/BAI1-associated protein 3 isoform 2 [Homo sapiens]//gi|312284085|ref|NP_001186027.1|/0/BAI1-associated protein 3 isoform 4 [Homo sapiens]//gi|312284087|ref|NP_001186028.1|/0/BAI1-associated protein 3 isoform 5 [Homo sapiens]
26298	5467	477	1020	2.76333806717555	7.59948307312707	1.45948921540603	Up	1.233488e-80	4.27037890567515e-79	EHF	1	GO:0043231//intracellular membrane-bounded organelle	GO:0001071//nucleic acid binding transcription factor activity;GO:0003677//DNA binding	GO:0006355//regulation of transcription, DNA-dependent;GO:0030154//cell differentiation;GO:0032501//multicellular organismal process	gi|331028756|ref|NP_001193544.1|/2.40505e-168/ETS homologous factor isoform 3 [Homo sapiens]//gi|331028760|ref|NP_001193545.1|/0/ETS homologous factor isoform 1 precursor [Homo sapiens]
6638	1643	30	64	0.542625030557515	1.48876716581577	1.45609063894417	Up	2.10486e-06	7.72072947543023e-06	SNRPN	2	GO:0030532//small nuclear ribonucleoprotein complex	GO:0005515//protein binding	GO:0006396//RNA processing;GO:0009719	gi|381352839|gb|AFG25597.1|/1.88704e-61/SNRPN [Sus scrofa]//gi|381352839|gb|AFG25597.1|/2.4436e-61/SNRPN [Sus scrofa]//gi|381352839|gb|AFG25597.1|/2.44686e-61/SNRPN [Sus scrofa]//gi|381352839|gb|AFG25597.1|/2.50177e-61/SNRPN [Sus scrofa]//gi|381352839|gb|AFG25597.1|/2.72144e-61/SNRPN [Sus scrofa]
389084	480	83	177	5.47648080319551	15.0198288216076	1.45554735328876	Up	2.80648e-15	2.01499341233766e-14	C2orf82	1	GO:0031224//intrinsic to membrane	-	-	gi|46047467|ref|NP_996778.1|/4.65067e-32/uncharacterized protein C2orf82 precursor [Homo sapiens]
2687	2500	93	198	1.1781691713477	3.22595374283748	1.45317904352427	Up	7.10582e-17	5.5796298988016e-16	GGT5	1	GO:0031224//intrinsic to membrane	GO:0016747//transferase activity, transferring acyl groups other than amino-acyl groups;GO:0016755	GO:0006691//leukotriene metabolic process;GO:0006749//glutathione metabolic process;GO:0009058//biosynthetic process	gi|153266885|ref|NP_004112.2|/0/gamma-glutamyltransferase 5 isoform b [Homo sapiens]//gi|153266901|ref|NP_001093251.1|/0/gamma-glutamyltransferase 5 isoform a [Homo sapiens]//gi|153266907|ref|NP_001093252.1|/0/gamma-glutamyltransferase 5 isoform c [Homo sapiens]
51673	1146	75	159	2.07272344787567	5.6512622418685	1.44704549934117	Up	9.13696e-14	5.98230789637306e-13	TPPP3	2	GO:0015630//microtubule cytoskeleton	GO:0008092//cytoskeletal protein binding;GO:0046872//metal ion binding	GO:0000226//microtubule cytoskeleton organization	gi|56676375|ref|NP_057224.2|/8.44515e-96/tubulin polymerization-promoting protein family member 3 [Homo sapiens]//gi|56676375|ref|NP_057224.2|/9.52897e-96/tubulin polymerization-promoting protein family member 3 [Homo sapiens]
389119	1058	18	38	0.538829732612217	1.46295471525062	1.44098374655396	Up	0.000295036	0.000832187799107143	FAM212A	1	-	-	-	gi|42766424|ref|NP_976248.1|/1.21373e-126/protein FAM212A [Homo sapiens]
440173	2018	18	38	0.282498442568744	0.76700004397183	1.44098374655396	Up	0.000295036	0.000832055137254902	LOC440173	1	-	-	-	gi|119583126|gb|EAW62722.1|/3.14443e-56/hCG1984907 [Homo sapiens]
219670	3399	19	40	0.177038267545533	0.479337913236138	1.43698181599646	Up	0.00020999	0.000605235107526882	ENKUR	1	GO:0042995//cell projection	GO:0019904//protein domain specific binding	-	gi|21450721|ref|NP_659447.1|/1.92058e-135/enkurin isoform 1 [Homo sapiens]//gi|21450721|ref|NP_659447.1|/3.62026e-135/enkurin isoform 1 [Homo sapiens]//gi|393281726|ref|NP_001257312.1|/1.10513e-96/enkurin isoform 2 [Homo sapiens]//gi|393281726|ref|NP_001257312.1|/1.58878e-19/enkurin isoform 2 [Homo sapiens]
399844	4874	20	42	0.129959845234059	0.350991597341838	1.43337056244409	Up	0.0001495818	0.000440527987980689	FLJ45445	1	-	-	-	gi|194381138|dbj|BAG64137.1|/0/unnamed protein product [Homo sapiens]
26257	1857	30	63	0.511651280832638	1.38185221764468	1.43337056244408	Up	3.31808e-06	1.1955224700611e-05	NKX2-8	2	-	GO:0043566//structure-specific DNA binding	GO:0006351//transcription, DNA-dependent;GO:0008285//negative regulation of cell proliferation;GO:0030323//respiratory tube development;GO:0048667//cell morphogenesis involved in neuron differentiation	gi|31377777|ref|NP_055175.2|/1.88229e-84/homeobox protein Nkx-2.8 [Homo sapiens]
715	2526	3055	6404	38.3038636722944	103.264472561778	1.43078216236286	Up	0	0	C1R	4	-	GO:0004175//endopeptidase activity;GO:0046872//metal ion binding	GO:0002455//humoral immune response mediated by circulating immunoglobulin;GO:0006952//defense response;GO:0019538//protein metabolic process	gi|66347875|ref|NP_001724.3|/0/complement C1r subcomponent precursor [Homo sapiens]
6275	564	8602	18022	483.042172459244	1301.5379493834	1.42999632196	Up	0	0	S100A4	2	GO:0042995//cell projection;GO:0043231//intracellular membrane-bounded organelle;GO:0044444//cytoplasmic part	GO:0005102//receptor binding;GO:0046872//metal ion binding	GO:0000904//cell morphogenesis involved in differentiation;GO:0007249//I-kappaB kinase/NF-kappaB cascade	gi|171849067|pdb|3C1V|A/3.42465e-53/Chain A, The 1.5 A Crystal Structure Of Ca2+-Bound S100a4//gi|171849067|pdb|3C1V|A/4.46356e-53/Chain A, The 1.5 A Crystal Structure Of Ca2+-Bound S100a4
222171	1717	66	138	1.21741417746864	3.2737216112168	1.42711157197241	Up	6.45138e-12	3.75555655083909e-11	PRR15	2	-	-	GO:0032501//multicellular organismal process	gi|28557711|ref|NP_787083.1|/2.25223e-52/proline-rich protein 15 [Homo sapiens]
57822	2879	41	85	0.451031533735725	1.20256958321135	1.41482016607231	Up	8.71062e-08	3.68659278516746e-07	GRHL3	1	GO:0043231//intracellular membrane-bounded organelle	GO:0003676//nucleic acid binding	GO:0030036//actin cytoskeleton organization	gi|303324553|ref|NP_937817.3|/0/grainyhead-like protein 3 homolog isoform 3 [Homo sapiens]//gi|38049007|ref|NP_067003.2|/0/grainyhead-like protein 3 homolog isoform 1 [Homo sapiens]//gi|38049009|ref|NP_937816.1|/0/grainyhead-like protein 3 homolog isoform 2 [Homo sapiens]
190	1591	296	609	5.89231893647261	15.5912188302575	1.40382628683007	Up	3.6949e-46	7.56556434027778e-45	NR0B1	4	GO:0005626//insoluble fraction;GO:0005840//ribosome;GO:0031981//nuclear lumen	GO:0000217//DNA secondary structure binding;GO:0001071//nucleic acid binding transcription factor activity;GO:0003712//transcription cofactor activity;GO:0004879//ligand-activated sequence-specific DNA binding RNA polymerase II transcription factor activity;GO:0019904//protein domain specific binding;GO:0035257//nuclear hormone receptor binding;GO:0042802//identical protein binding	GO:0008202//steroid metabolic process;GO:0008406//gonad development;GO:0009755//hormone-mediated signaling pathway;GO:0009968//negative regulation of signal transduction;GO:0021536//diencephalon development;GO:0033036;GO:0035270//endocrine system development;GO:0043392//negative regulation of DNA binding;GO:0045595//regulation of cell differentiation;GO:0048232//male gamete generation	gi|5016090|ref|NP_000466.2|/0/nuclear receptor subfamily 0 group B member 1 [Homo sapiens]
80832	3417	20	41	0.18537438854867	0.488733188840174	1.39860514428341	Up	0.000236076	0.000674377606329727	APOL4	3	-	GO:0005488//binding;GO:0022892;GO:0060089	GO:0006952//defense response;GO:0007249//I-kappaB kinase/NF-kappaB cascade;GO:0010876//lipid localization;GO:0044238//primary metabolic process;GO:0044260;GO:0051234//establishment of localization	gi|19923626|ref|NP_085146.2|/1.08509e-171/apolipoprotein L4 isoform 1 [Homo sapiens]//gi|22035657|ref|NP_663693.1|/1.09124e-173/apolipoprotein L4 isoform 2 precursor [Homo sapiens]
692086	237	25	51	3.3408453885591	8.76505779763411	1.39155038674946	Up	4.34768e-05	0.000137103042566845	SNORD17	1	-	-	-	-
973	1258	27	55	0.679747842333535	1.78079940759002	1.38945344591388	Up	2.2199e-05	7.25249324099723e-05	CD79A	3	GO:0005770//late endosome;GO:0009986//cell surface;GO:0019814;GO:0031224//intrinsic to membrane	GO:0004872//receptor activity	GO:0030098//lymphocyte differentiation;GO:0042113//B cell activation;GO:0050851//antigen receptor-mediated signaling pathway	gi|11038672|ref|NP_067612.1|/3.15204e-99/B-cell antigen receptor complex-associated protein alpha chain isoform 2 precursor [Homo sapiens]//gi|4502685|ref|NP_001774.1|/1.31377e-133/B-cell antigen receptor complex-associated protein alpha chain isoform 1 precursor [Homo sapiens]
3106	1578	699	1416	14.0292641217964	36.5501537864215	1.38143813926025	Up	2.1259e-102	9.21796492647059e-101	HLA-B	6	GO:0005626//insoluble fraction;GO:0016021//integral to membrane;GO:0042611	GO:0004888//transmembrane signaling receptor activity;GO:0005488//binding	GO:0002682//regulation of immune system process;GO:0006950//response to stress;GO:0019221//cytokine-mediated signaling pathway;GO:0048002//antigen processing and presentation of peptide antigen;GO:0051704	gi|458664|gb|AAA87398.1|/1.8278e-178/MHC class I antigen [Homo sapiens]
1506	1197	47	95	1.24356480478395	3.23267771247943	1.378247991206	Up	2.91192e-08	1.28433748990277e-07	CTRL	2	GO:0044421//extracellular region part	GO:0004175//endopeptidase activity	GO:0019538//protein metabolic process;GO:0032501//multicellular organismal process	gi|62897905|dbj|BAD96892.1|/3.21383e-134/chymotrypsin-like variant [Homo sapiens]
3959	2277	6079	12214	84.5539357178926	218.488125740369	1.3696110609493	Up	0	0	LGALS3BP	3	GO:0031012//extracellular matrix;GO:0044464//cell part	GO:0004888//transmembrane signaling receptor activity;GO:0005488//binding	GO:0006952//defense response;GO:0009987//cellular process;GO:0023052//signaling	gi|5031863|ref|NP_005558.1|/0/galectin-3-binding protein precursor [Homo sapiens]
57834	3395	71	142	0.662343509317043	1.70365448105102	1.36298123455269	Up	1.731836e-11	9.7947284769821e-11	CYP4F11	1	GO:0031090//organelle membrane;GO:0031224//intrinsic to membrane;GO:0042598;GO:0043231//intracellular membrane-bounded organelle	GO:0005506//iron ion binding;GO:0016709//oxidoreductase activity, acting on paired donors, with incorporation or reduction of molecular oxygen, NAD(P)H as one donor, and incorporation of one atom of oxygen;GO:0016712//oxidoreductase activity, acting on paired donors, with incorporation or reduction of molecular oxygen, reduced flavin or flavoprotein as one donor, and incorporation of one atom of …	GO:0006690//icosanoid metabolic process;GO:0006952//defense response	gi|193083178|ref|NP_067010.3|/0/cytochrome P450 4F11 precursor [Homo sapiens]
10457	2775	34	68	0.38804370653707	0.998111086145001	1.36298123455269	Up	3.32452e-06	1.19759892730605e-05	GPNMB	1	GO:0016021//integral to membrane;GO:0048770	GO:0005102//receptor binding;GO:0005539//glycosaminoglycan binding	GO:0001503//ossification;GO:0008283//cell proliferation;GO:0009987//cellular process	gi|194388124|dbj|BAG65446.1|/0/unnamed protein product [Homo sapiens]
55068	3047	27	54	0.280644169890249	0.721862131792257	1.36298123455269	Up	3.45672e-05	0.000110463933381503	ENOX1	1	GO:0016020//membrane;GO:0044421//extracellular region part	GO:0003824//catalytic activity;GO:0005488//binding	GO:0006091//generation of precursor metabolites and energy;GO:0051234//establishment of localization	gi|296481918|gb|DAA24033.1|/0/candidate growth-related and time keeping constitutive hydroquinone (NADH) oxidase-like [Bos taurus]
10158	894	281	561	9.95482238666087	25.5598497521612	1.36041187494056	Up	1.005586e-40	1.82834757718397e-39	PDZK1IP1	3	GO:0031224//intrinsic to membrane	-	-	gi|384475749|ref|NP_001245020.1|/1.20144e-41/PDZK1-interacting protein 1 precursor [Macaca mulatta]
716	2850	2974	5893	33.0491899225434	84.2218031478879	1.34957885335188	Up	0	0	C1S	3	-	GO:0004175//endopeptidase activity;GO:0046872//metal ion binding	GO:0002455//humoral immune response mediated by circulating immunoglobulin;GO:0006952//defense response;GO:0010033//response to organic substance;GO:0019538//protein metabolic process;GO:0030154//cell differentiation	gi|4502495|ref|NP_001725.1|/0/complement C1s subcomponent precursor [Homo sapiens]
10110	2146	110	217	1.62340800148622	4.11872665492137	1.34317275347251	Up	1.94838e-16	1.49864306869565e-15	SGK2	2	-	GO:0004672//protein kinase activity;GO:0016247//channel regulator activity;GO:0032559	GO:0006464//cellular protein modification process;GO:0006950//response to stress;GO:0035556//intracellular signal transduction	gi|20127541|ref|NP_057360.2|/0/serine/threonine-protein kinase Sgk2 isoform beta [Homo sapiens]
2266	1763	567	1107	10.185807429817	25.575743204314	1.32821581639201	Up	8.0216e-76	2.62310768207024e-74	FGG	2	GO:0005615//extracellular space;GO:0009986//cell surface;GO:0016020//membrane;GO:0031091//platelet alpha granule	GO:0005515//protein binding;GO:0043498//cell surface binding	GO:0001775//cell activation;GO:0006887//exocytosis;GO:0007599//hemostasis;GO:0010038//response to metal ion;GO:0023052//signaling;GO:0043623//cellular protein complex assembly	gi|70906437|ref|NP_000500.2|/0/fibrinogen gamma chain isoform gamma-A precursor [Homo sapiens]//gi|70906439|ref|NP_068656.2|/0/fibrinogen gamma chain isoform gamma-B precursor [Homo sapiens]
2743	3076	41	80	0.422145574000374	1.05934302151472	1.32735732482197	Up	7.7043e-07	2.95334282340195e-06	GLRB	1	GO:0005626//insoluble fraction;GO:0034702//ion channel complex;GO:0044459//plasma membrane part	GO:0004871//signal transducer activity;GO:0005231//excitatory extracellular ligand-gated ion channel activity;GO:0005237//inhibitory extracellular ligand-gated ion channel activity;GO:0016597//amino acid binding	GO:0006873//cellular ion homeostasis;GO:0007186//G-protein coupled receptor signaling pathway;GO:0007270//neuron-neuron synaptic transmission;GO:0007338//single fertilization;GO:0008344//adult locomotory behavior;GO:0015698//inorganic anion transport;GO:0048731;GO:0050953//sensory perception of light stimulus;GO:0051259//protein oligomerization;GO:0060004//reflex	gi|260593686|ref|NP_001159533.1|/1.99819e-152/glycine receptor subunit beta isoform B precursor [Homo sapiens] //gi|4504023|ref|NP_000815.1|/0/glycine receptor subunit beta isoform A precursor [Homo sapiens]
6296	2158	217	422	3.18473285427629	7.96515010787565	1.3225291908154	Up	8.64086e-30	1.150229151693e-28	ACSM3	2	GO:0044429//mitochondrial part	GO:0016878//acid-thiol ligase activity;GO:0032559;GO:0043169//cation binding	GO:0006631//fatty acid metabolic process;GO:0008015//blood circulation	gi|42544132|ref|NP_005613.2|/0/acyl-coenzyme A synthetase ACSM3, mitochondrial isoform 1 [Homo sapiens]//gi|42544134|ref|NP_973729.1|/0/acyl-coenzyme A synthetase ACSM3, mitochondrial isoform 2 [Homo sapiens]
51393	2829	51	99	0.570955082524056	1.42539490227884	1.3199125126608	Up	4.34232e-08	1.88607864276946e-07	TRPV2	4	GO:0016021//integral to membrane;GO:0048770	GO:0005261//cation channel activity	GO:0006811//ion transport;GO:0006950//response to stress;GO:0009628//response to abiotic stimulus;GO:0050877//neurological system process	gi|20127551|ref|NP_057197.2|/0/transient receptor potential cation channel subfamily V member 2 [Homo sapiens]
4051	2988	152	294	1.61111933437019	4.00774140498956	1.31472606594547	Up	4.6243e-21	4.49991701320132e-20	CYP4F3	1	GO:0031090//organelle membrane;GO:0031224//intrinsic to membrane;GO:0042598;GO:0043231//intracellular membrane-bounded organelle	GO:0005506//iron ion binding;GO:0016709//oxidoreductase activity, acting on paired donors, with incorporation or reduction of molecular oxygen, NAD(P)H as one donor, and incorporation of one atom of oxygen;GO:0016713	GO:0006690//icosanoid metabolic process	gi|119220562|ref|NP_000887.2|/0/leukotriene-B(4) omega-hydroxylase 2 isoform a [Homo sapiens]//gi|312836833|ref|NP_001186137.1|/0/leukotriene-B(4) omega-hydroxylase 2 isoform b [Homo sapiens]
57169	7371	2820	5443	12.1167852773821	30.0777175880779	1.31168810799163	Up	0	0	ZNFX1	2	-	GO:0043169//cation binding	-	gi|7243189|dbj|BAA92642.1|/0/KIAA1404 protein [Homo sapiens]
4316	1147	2861	5518	78.9985562905046	195.952691176997	1.31060719358278	Up	0	0	MMP7	3	GO:0031012//extracellular matrix	GO:0004175//endopeptidase activity;GO:0046914//transition metal ion binding	GO:0008283//cell proliferation;GO:0019538//protein metabolic process;GO:0032963//collagen metabolic process;GO:0042221//response to chemical stimulus;GO:0042742//defense response to bacterium	gi|4505219|ref|NP_002414.1|/1.2642e-156/matrilysin preproprotein [Homo sapiens]
57016	1610	22567	43221	443.928132134567	1093.45745278232	1.30049904358817	Up	0	0	AKR1B10	4	GO:0044424//intracellular part	GO:0005488//binding;GO:0016616//oxidoreductase activity, acting on the CH-OH group of donors, NAD or NADP as acceptor	GO:0006629//lipid metabolic process;GO:0032501//multicellular organismal process;GO:0044237//cellular metabolic process	gi|119388973|pdb|1ZUA|X/0/Chain X, Crystal Structure Of Akr1b10 Complexed With Nadp+ And Tolrestat
51090	1514	115	220	2.40567347596244	5.9187467760852	1.29885089713297	Up	7.13998e-16	5.3251849148398e-15	PLLP	2	GO:0031224//intrinsic to membrane;GO:0043209//myelin sheath	GO:0015075//ion transmembrane transporter activity	GO:0006811//ion transport;GO:0006950//response to stress;GO:0008366//axon ensheathment	gi|7705755|ref|NP_057077.1|/5.88978e-86/plasmolipin [Homo sapiens]
23284	6141	102	195	0.526048502999692	1.29338693039602	1.2978862063308	Up	3.17864e-14	2.14303811890244e-13	LPHN3	4	GO:0031224//intrinsic to membrane	GO:0004888//transmembrane signaling receptor activity;GO:0030246//carbohydrate binding	GO:0007186//G-protein coupled receptor signaling pathway	gi|163792198|ref|NP_056051.2|/0/latrophilin-3 precursor [Homo sapiens]
6590	598	226	432	11.9693886757192	29.4249353253646	1.29768977430097	Up	1.291174e-29	1.70974245763473e-28	SLPI	2	GO:0044421//extracellular region part	GO:0004866//endopeptidase inhibitor activity	GO:0010466//negative regulation of peptidase activity	gi|4507065|ref|NP_003055.1|/1.45874e-79/antileukoproteinase precursor [Homo sapiens]
999	4815	1014	1937	6.66970120114431	16.3857484499098	1.2967475361526	Up	1.760712e-126	9.18842359646017e-125	CDH1	3	GO:0005856//cytoskeleton;GO:0005911//cell-cell junction;GO:0005924//cell-substrate adherens junction;GO:0016234//inclusion body;GO:0019897//extrinsic to plasma membrane;GO:0031224//intrinsic to membrane;GO:0044444//cytoplasmic part	GO:0019902//phosphatase binding;GO:0046872//metal ion binding	GO:0001825//blastocyst formation;GO:0002682//regulation of immune system process;GO:0007162//negative regulation of cell adhesion;GO:0010226//response to lithium ion;GO:0016337//cell-cell adhesion;GO:0021536//diencephalon development;GO:0030030//cell projection organization;GO:0042307//positive regulation of protein import into nucleus;GO:0042981//regulation of apoptotic process;GO:0043170;GO:004…	gi|4757960|ref|NP_004351.1|/0/cadherin-1 preproprotein [Homo sapiens]
6775	2840	208	397	2.31958189118887	5.69383818780444	1.29553671355455	Up	2.78206e-27	3.38496722558459e-26	STAT4	1	GO:0031981//nuclear lumen	GO:0001071//nucleic acid binding transcription factor activity;GO:0003677//DNA binding;GO:0046872//metal ion binding;GO:0060089	GO:0002237//response to molecule of bacterial origin;GO:0006351//transcription, DNA-dependent;GO:0006464//cellular protein modification process;GO:0007166//cell surface receptor signaling pathway;GO:0007243//intracellular protein kinase cascade;GO:0043331//response to dsRNA	gi|4507255|ref|NP_003142.1|/0/signal transducer and activator of transcription 4 [Homo sapiens]
2920	1234	299	570	7.67398141878326	18.81449864751	1.29379766940669	Up	2.28724e-38	3.90198291610415e-37	CXCL2	3	GO:0000267//cell fraction;GO:0044421//extracellular region part	GO:0005125//cytokine activity;GO:0030234//enzyme regulator activity	GO:0006952//defense response;GO:0007010//cytoskeleton organization;GO:0007166//cell surface receptor signaling pathway;GO:0008283//cell proliferation;GO:0009607//response to biotic stimulus;GO:0030595//leukocyte chemotaxis;GO:0048731	gi|4504155|ref|NP_002080.1|/7.22966e-36/C-X-C motif chemokine 2 precursor [Homo sapiens]
5721	829	3441	6557	131.460371953754	322.168894795137	1.29318923733974	Up	0	0	PSME2	2	GO:0022624//proteasome accessory complex	GO:0061135	GO:0006520//cellular amino acid metabolic process;GO:0006915//apoptotic process;GO:0007050//cell cycle arrest;GO:0016070//RNA metabolic process;GO:0019882//antigen processing and presentation;GO:0030330//DNA damage response, signal transduction by p53 class mediator;GO:0043161//proteasomal ubiquitin-dependent protein catabolic process;GO:0051320//S phase;GO:0051439//regulation of ubiquitin-protei…	gi|30410792|ref|NP_002809.2|/4.62328e-122/proteasome activator complex subunit 2 [Homo sapiens]
140738	1687	95	181	1.78350050796463	4.37015103205726	1.29297151330495	Up	3.07316e-13	1.95144556927495e-12	TMEM37	2	GO:0031224//intrinsic to membrane	GO:0005261//cation channel activity	GO:0034220//ion transmembrane transport	gi|116325983|ref|NP_899063.2|/1.08199e-83/voltage-dependent calcium channel gamma-like subunit [Homo sapiens]
441549	1330	40	76	0.952517722813242	2.32752795298519	1.28898065310891	Up	2.49874e-06	9.10321444398682e-06	CDNF	2	-	GO:0005102//receptor binding	-	gi|82880674|ref|NP_001025125.2|/1.38012e-104/cerebral dopamine neurotrophic factor precursor [Homo sapiens]
440836	970	187	355	6.10568770208457	14.9069767091964	1.2877619890571	Up	2.37228e-24	2.61157470317362e-23	ODF3B	3	-	-	-	gi|116292180|ref|NP_001014440.2|/4.72513e-143/outer dense fiber protein 3B [Homo sapiens]
3601	1861	59	112	1.00408470861304	2.45134593651315	1.28769310724846	Up	1.100946e-08	5.03017450568182e-08	IL15RA	2	GO:0005635//nuclear envelope;GO:0012506//vesicle membrane;GO:0031224//intrinsic to membrane;GO:0044421//extracellular region part	GO:0004888//transmembrane signaling receptor activity;GO:0005488//binding	GO:0001779//natural killer cell differentiation;GO:0007166//cell surface receptor signaling pathway	gi|294712549|ref|NP_751950.2|/1.44846e-103/interleukin-15 receptor subunit alpha isoform 2 precursor [Homo sapiens]//gi|377520151|ref|NP_001243694.1|/1.36068e-123/interleukin-15 receptor subunit alpha isoform 4 [Homo sapiens]//gi|377520151|ref|NP_001243694.1|/2.82589e-170/interleukin-15 receptor subunit alpha isoform 4 [Homo sapiens]//gi|377520151|ref|NP_001243694.1|/2.97578e-64/interleukin-15 re…
149483	2267	29	55	0.405145661324512	0.988198347926002	1.28635995294978	Up	6.43694e-05	0.000198909878672489	CCDC17	1	-	-	-	gi|298104089|ref|NP_001177111.1|/0/coiled-coil domain-containing protein 17 isoform 2 [Homo sapiens]//gi|298104091|ref|NP_001108410.2|/0/coiled-coil domain-containing protein 17 isoform 1 [Homo sapiens]
59285	1886	361	684	6.06219955268189	14.7722744417989	1.28497872255141	Up	3.16752e-45	6.32467227088036e-44	CACNG6	1	GO:0016021//integral to membrane;GO:0034704//calcium channel complex	GO:0005262//calcium channel activity	GO:0032412//regulation of ion transmembrane transporter activity;GO:0034765//regulation of ion transmembrane transport;GO:0070838//divalent metal ion transport	gi|22027554|ref|NP_665813.1|/6.80417e-90/voltage-dependent calcium channel gamma-6 subunit isoform a [Homo sapiens]//gi|22027557|ref|NP_665814.1|/3.64444e-82/voltage-dependent calcium channel gamma-6 subunit isoform b [Homo sapiens]//gi|22027560|ref|NP_114103.2|/2.24511e-57/voltage-dependent calcium channel gamma-6 subunit isoform c [Homo sapiens]
112703	1329	36	68	0.857910996393868	2.08409199702963	1.28051907436072	Up	9.43576e-06	3.2095372074601e-05	FAM71E1	1	-	-	-	gi|76253859|ref|NP_612420.1|/1.29475e-94/protein FAM71E1 [Homo sapiens]
6490	2195	44	83	0.634867165592607	1.54019788232847	1.27858904726232	Up	1.008798e-06	3.81664786526946e-06	PMEL	1	GO:0005771//multivesicular body;GO:0031090//organelle membrane;GO:0031224//intrinsic to membrane;GO:0048770	GO:0005488//binding	GO:0006582//melanin metabolic process;GO:0048753//pigment granule organization	gi|318037593|ref|NP_001186982.1|/0/melanocyte protein PMEL isoform 2 precursor [Homo sapiens]//gi|318037595|ref|NP_001186983.1|/0/melanocyte protein PMEL isoform 1 precursor [Homo sapiens]//gi|5902084|ref|NP_008859.1|/0/melanocyte protein PMEL isoform 3 preproprotein [Homo sapiens]
100526831	2214	84	158	1.20161788609638	2.90678174796931	1.27444455995103	Up	1.643212e-11	9.30837767915466e-11	SLX1B-SULT1A4	1	GO:0044444//cytoplasmic part	GO:0008146//sulfotransferase activity	GO:0006576//cellular biogenic amine metabolic process;GO:0006629//lipid metabolic process;GO:0006790//sulfur compound metabolic process;GO:0009698//phenylpropanoid metabolic process	gi|29550921|ref|NP_808220.1|/2.78939e-162/sulfotransferase 1A3/1A4 [Homo sapiens]
89765	1382	41	77	0.939594635039907	2.26942396284193	1.27221577062951	Up	2.7209e-06	9.87596263848995e-06	RSPH1	2	GO:0043231//intracellular membrane-bounded organelle;GO:0044444//cytoplasmic part	-	GO:0022403	gi|18254456|ref|NP_543136.1|/8.74132e-150/radial spoke head 1 homolog [Homo sapiens]
283120	2322	76	142	1.03661166474981	2.49091600480973	1.26480084061378	Up	2.21152e-10	1.15991699733175e-09	H19	1	-	-	-	gi|119622882|gb|EAX02477.1|/2.37981e-87/hCG1640777, isoform CRA_a [Homo sapiens]
89944	3178	83	155	0.82715883748705	1.98660150172194	1.26406620848	Up	3.4146e-11	1.89603542372881e-10	GLB1L2	3	-	GO:0016798//hydrolase activity, acting on glycosyl bonds;GO:0043167//ion binding	GO:0044238//primary metabolic process	gi|31543093|ref|NP_612351.2|/0/beta-galactosidase-1-like protein 2 precursor [Homo sapiens]
11054	2423	2428	4527	31.7365696576293	76.1009423257818	1.26176811954485	Up	1.33068e-280	1.53863136470588e-278	OGFR	2	GO:0043231//intracellular membrane-bounded organelle	GO:0008528//G-protein coupled peptide receptor activity	GO:0016049//cell growth	gi|33286446|ref|NP_031372.2|/0/opioid growth factor receptor [Homo sapiens]
3965	1835	118	220	2.03662304384619	4.88336927465558	1.26169789871551	Up	3.11874e-15	2.23465489428919e-14	LGALS9	3	GO:0044424//intracellular part	GO:0048029//monosaccharide binding;GO:0060089	GO:0007249//I-kappaB kinase/NF-kappaB cascade	gi|102469694|ref|NP_002299.2|/4.69941e-159/galectin-9 isoform short [Homo sapiens]//gi|102469694|ref|NP_002299.2|/7.0936e-179/galectin-9 isoform short [Homo sapiens]//gi|6806890|ref|NP_033665.1|/0/galectin-9 isoform long [Homo sapiens]
7216	4665	29	54	0.196884290294248	0.471492800765489	1.25988774158859	Up	9.79786e-05	0.000296145466017427	TRO	1	GO:0016021//integral to membrane	-	GO:0007275//multicellular organismal development;GO:0016337//cell-cell adhesion	gi|29540541|ref|NP_808224.1|/0/trophinin isoform 2 [Homo sapiens]//gi|58257678|dbj|BAA83066.3|/0/KIAA1114 protein [Homo sapiens]
55603	5617	340	632	1.91707545956982	4.58295516468154	1.25737104659209	Up	1.446376e-40	2.61634333496933e-39	FAM46A	2	-	-	-	gi|6706655|emb|CAB65981.1|/0/family with sequence similarity 46, member A [Homo sapiens]
55512	5269	86	159	0.516933844825292	1.22914149348668	1.24959943513495	Up	2.89416e-11	1.61414201008827e-10	SMPD3	3	GO:0012505//endomembrane system;GO:0031224//intrinsic to membrane;GO:0031985//Golgi cisterna	GO:0004620//phospholipase activity;GO:0043169//cation binding	GO:0002790//peptide secretion;GO:0006684//sphingomyelin metabolic process;GO:0023052//signaling;GO:0032501//multicellular organismal process;GO:0050896//response to stimulus	gi|158260325|dbj|BAF82340.1|/0/unnamed protein product [Homo sapiens]
728730	2517	59	109	0.742392388847388	1.76390924525993	1.24852250996777	Up	3.7601e-08	1.64327888092885e-07	LOC728730	1	GO:0043231//intracellular membrane-bounded organelle	GO:0001071//nucleic acid binding transcription factor activity;GO:0046914//transition metal ion binding	GO:0006325//chromatin organization;GO:0006351//transcription, DNA-dependent	gi|119620750|gb|EAX00345.1|/7.26869e-21/hCG1817877 [Homo sapiens]
6891	5679	1092	2013	6.0899746430051	14.4379276217267	1.24535555055418	Up	2.28812e-123	1.16991707861272e-121	TAP2	2	GO:0042824//MHC class I peptide loading complex	GO:0003823//antigen binding;GO:0015440//peptide-transporting ATPase activity;GO:0032559;GO:0042287//MHC protein binding;GO:0046977	GO:0001912//positive regulation of leukocyte mediated cytotoxicity;GO:0002477//antigen processing and presentation of exogenous peptide antigen via MHC class Ib;GO:0002484;GO:0002488;GO:0015833//peptide transport;GO:0022415;GO:0046907//intracellular transport;GO:0051704	gi|62087486|dbj|BAD92190.1|/0/transporter 2, ATP-binding cassette, sub-family B isoform 1 variant [Homo sapiens]//gi|73747917|ref|NP_061313.2|/0/antigen peptide transporter 2 isoform 2 [Homo sapiens]
352954	4074	1049	1932	8.15491010884481	19.3160824964235	1.24406165081119	Up	2.733e-118	1.33562162983425e-116	GATS	6	-	-	-	gi|45708735|gb|AAH33723.1|/4.61645e-93/STAG3OS protein [Homo sapiens]//gi|45708735|gb|AAH33723.1|/4.86663e-93/STAG3OS protein [Homo sapiens]//gi|45708735|gb|AAH33723.1|/6.17243e-93/STAG3OS protein [Homo sapiens]//gi|45708735|gb|AAH33723.1|/7.15056e-93/STAG3OS protein [Homo sapiens]
115265	2649	31	57	0.37063331173641	0.876447388864752	1.24167493833055	Up	7.5845e-05	0.000232020386477607	DDIT4L	3	GO:0044424//intracellular part	-	GO:0007165//signal transduction	gi|21687001|ref|NP_660287.1|/2.58768e-93/DNA damage-inducible transcript 4-like protein [Homo sapiens]
140699	3481	42	77	0.382128985897355	0.900989346925466	1.23745035246883	Up	4.44248e-06	1.57215270414083e-05	C20orf132	1	-	-	-	gi|123231626|emb|CAI42666.2|/0/chromosome 20 open reading frame 132 [Homo sapiens]//gi|194595501|ref|NP_689716.4|/0/uncharacterized protein C20orf132 isoform 1 [Homo sapiens]//gi|47578111|ref|NP_998796.1|/0/uncharacterized protein C20orf132 isoform 2 [Homo sapiens]
84818	2641	568	1041	6.81152961493786	16.0551838256372	1.23698846834743	Up	4.85596e-64	1.37012421626794e-62	IL17RC	1	GO:0031224//intrinsic to membrane	GO:0004871//signal transducer activity	-	gi|229462881|sp|Q8NAC3.2|I17RC_HUMAN/0/RecName: Full=Interleukin-17 receptor C; Short=IL-17 receptor C; Short=IL-17RC; AltName: Full=Interleukin-17 receptor homolog; Short=IL17Rhom; AltName: Full=Interleukin-17 receptor-like protein; Short=IL-17RL; AltName: Full=ZcytoR14; Flags: Precursor//gi|24430195|ref|NP_703190.1|/0/interleukin-17 receptor C isoform 1 precursor [Homo sapiens]//gi|322812168|re…
1577	3330	208	381	1.97826203332624	4.66029808604468	1.23618870390492	Up	1.717022e-24	1.90324788233083e-23	CYP3A5	1	GO:0031090//organelle membrane;GO:0042598;GO:0043231//intracellular membrane-bounded organelle	GO:0004497//monooxygenase activity;GO:0005506//iron ion binding;GO:0016712//oxidoreductase activity, acting on paired donors, with incorporation or reduction of molecular oxygen, reduced flavin or flavoprotein as one donor, and incorporation of one atom of oxygen;GO:0046872//metal ion binding	GO:0006629//lipid metabolic process;GO:0009820//alkaloid metabolic process;GO:0017144//drug metabolic process;GO:0055114//oxidation-reduction process	gi|119597045|gb|EAW76639.1|/1.49478e-110/cytochrome P450, family 3, subfamily A, polypeptide 5, isoform CRA_b [Homo sapiens]//gi|189054042|dbj|BAG36549.1|/1.52523e-137/unnamed protein product [Homo sapiens]//gi|189054042|dbj|BAG36549.1|/4.67703e-132/unnamed protein product [Homo sapiens]//gi|189054042|dbj|BAG36549.1|/6.24175e-132/unnamed protein product [Homo sapiens]//gi|221041210|dbj|BAH12282.1…
727800	1095	59	108	1.70648551847386	4.01737701474157	1.23522568735432	Up	5.62884e-08	2.41815950558524e-07	RNF208	4	-	GO:0046914//transition metal ion binding	-	gi|119220603|ref|NP_112587.2|/5.91037e-132/RING finger protein 208 [Homo sapiens]
170302	2885	41	75	0.450093513214957	1.05888403407039	1.23424792043049	Up	6.1821e-06	2.15375208940528e-05	ARX	2	-	-	GO:0006935//chemotaxis;GO:0008283//cell proliferation;GO:0021536//diencephalon development;GO:0021795//cerebral cortex cell migration;GO:0021830;GO:0021988//olfactory lobe development;GO:0045927//positive regulation of growth;GO:0048869//cellular developmental process	gi|24497589|ref|NP_620689.1|/1.23065e-128/homeobox protein ARX [Homo sapiens]
2979	2287	35	64	0.484692829000398	1.13984753272559	1.23369821760773	Up	3.00864e-05	9.67390953107961e-05	GUCA1B	5	GO:0016020//membrane	GO:0030250//guanylate cyclase activator activity;GO:0046872//metal ion binding	GO:0007154//cell communication;GO:0007167//enzyme linked receptor protein signaling pathway;GO:0030826//regulation of cGMP biosynthetic process;GO:0046903//secretion;GO:0050953//sensory perception of light stimulus	gi|153945858|ref|NP_002089.4|/2.09707e-112/guanylyl cyclase-activating protein 2 [Homo sapiens]
87178	4579	1909	3482	13.2038322924827	30.9735566313939	1.23008033479986	Up	7.6135e-208	6.6678429950495e-206	PNPT1	3	GO:0005740//mitochondrial envelope;GO:0016020//membrane	GO:0003676//nucleic acid binding;GO:0008408//3'-5' exonuclease activity;GO:0016779//nucleotidyltransferase activity	GO:0006401//RNA catabolic process;GO:0010467//gene expression	gi|188528628|ref|NP_149100.2|/0/polyribonucleotide nucleotidyltransferase 1, mitochondrial precursor [Homo sapiens]
8644	1251	15142	27612	383.345744749294	899.028602847302	1.22972085062498	Up	0	0	AKR1C3	1	GO:0044424//intracellular part	GO:0016628//oxidoreductase activity, acting on the CH-CH group of donors, NAD or NADP as acceptor;GO:0047023//androsterone dehydrogenase activity	GO:0006692	gi|359806990|ref|NP_001240837.1|/0/aldo-keto reductase family 1 member C3 isoform 2 [Homo sapiens]//gi|359806998|ref|NP_001240838.1|/9.21034e-74/aldo-keto reductase family 1 member C3 isoform 3 [Homo sapiens] //gi|40788950|dbj|BAA04619.2|/0/KIAA0119 [Homo sapiens]
5582	3143	101	184	1.01775139759388	2.38454979593138	1.22833170785791	Up	1.667964e-12	1.01158557161467e-11	PRKCG	3	GO:0005624//membrane fraction;GO:0016020//membrane;GO:0043005//neuron projection;GO:0043231//intracellular membrane-bounded organelle;GO:0044444//cytoplasmic part	GO:0004674//protein serine/threonine kinase activity;GO:0032559;GO:0046914//transition metal ion binding	GO:0001775//cell activation;GO:0006298//mismatch repair;GO:0006796//phosphate-containing compound metabolic process;GO:0007169//transmembrane receptor protein tyrosine kinase signaling pathway;GO:0007267//cell-cell signaling;GO:0007599//hemostasis;GO:0007610//behavior;GO:0009895;GO:0010863//positive regulation of phospholipase C activity;GO:0016567//protein ubiquitination	gi|221041350|dbj|BAH12352.1|/0/unnamed protein product [Homo sapiens]
6999	1703	33	60	0.613711139962906	1.43505833859921	1.22547771080276	Up	5.8574e-05	0.000181922864115169	TDO2	3	GO:0000267//cell fraction;GO:0044444//cytoplasmic part	GO:0005506//iron ion binding;GO:0016702//oxidoreductase activity, acting on single donors with incorporation of molecular oxygen, incorporation of two atoms of oxygen;GO:0031406//carboxylic acid binding	GO:0006084//acetyl-CoA metabolic process;GO:0006569//tryptophan catabolic process	gi|5032165|ref|NP_005642.1|/0/tryptophan 2,3-dioxygenase [Homo sapiens]
440730	8522	54	98	0.200685938900631	0.468400661742502	1.22280357650443	Up	2.88506e-07	1.15999082863636e-06	TRIM67	3	GO:0043232	GO:0046914//transition metal ion binding	-	gi|134288906|ref|NP_001004342.3|/0/tripartite motif-containing protein 67 [Homo sapiens]
84707	1100	27	49	0.777384350595989	1.81441383607709	1.22280357650443	Up	0.00029054	0.000820029218251436	BEX2	1	GO:0043231//intracellular membrane-bounded organelle	-	GO:0006915//apoptotic process;GO:0007049//cell cycle	gi|270309182|ref|NP_001161871.1|/8.69145e-83/protein BEX2 isoform 1 [Homo sapiens]//gi|270309184|ref|NP_001161872.1|/2.51797e-82/protein BEX2 isoform 2 [Homo sapiens]//gi|270309184|ref|NP_001161872.1|/3.01938e-80/protein BEX2 isoform 2 [Homo sapiens]//gi|270309184|ref|NP_001161872.1|/3.43145e-80/protein BEX2 isoform 2 [Homo sapiens]
5602	4213	30	54	0.225524905888015	0.52207783422051	1.21097814110764	Up	0.0001595956	0.000468459558586361	MAPK10	2	GO:0016020//membrane;GO:0031981//nuclear lumen;GO:0044444//cytoplasmic part	GO:0004712//protein serine/threonine/tyrosine kinase activity;GO:0016909//SAP kinase activity;GO:0032559	GO:0000165//MAPK cascade;GO:0002224//toll-like receptor signaling pathway;GO:0006355//regulation of transcription, DNA-dependent;GO:0006468//protein phosphorylation;GO:0007166//cell surface receptor signaling pathway;GO:0008624;GO:0009416//response to light stimulus;GO:0010038//response to metal ion;GO:0048263//determination of dorsal identity	gi|148688303|gb|EDL20250.1|/0/mitogen activated protein kinase 10, isoform CRA_a [Mus musculus]
91828	2591	30	54	0.366706456389891	0.848905409328833	1.21097814110764	Up	0.0001595956	0.000468381844658261	EXOC3L4	1	-	-	-	gi|117938266|ref|NP_001071062.1|/0/exocyst complex component 3-like protein 4 [Homo sapiens]
51702	3189	253	455	2.5126425881893	5.81152126862483	1.20971039494444	Up	5.23242e-28	6.57901508315565e-27	PADI3	2	GO:0044424//intracellular part	GO:0016813//hydrolase activity, acting on carbon-nitrogen (but not peptide) bonds, in linear amidines;GO:0046872//metal ion binding	GO:0018195//peptidyl-arginine modification	gi|122939161|ref|NP_057317.2|/0/protein-arginine deiminase type-3 [Homo sapiens]
2627	3770	64	115	0.537654566086626	1.24248010752857	1.20847128549707	Up	3.64716e-08	1.59549721958457e-07	GATA6	4	GO:0031981//nuclear lumen;GO:0043234//protein complex	GO:0000981//sequence-specific DNA binding RNA polymerase II transcription factor activity;GO:0019900//kinase binding;GO:0043565//sequence-specific DNA binding;GO:0043566//structure-specific DNA binding;GO:0046872//metal ion binding	GO:0000122//negative regulation of transcription from RNA polymerase II promoter;GO:0001666//response to hypoxia;GO:0002065;GO:0003151//outflow tract morphogenesis;GO:0006915//apoptotic process;GO:0007050//cell cycle arrest;GO:0007599//hemostasis;GO:0008406//gonad development;GO:0019637//organophosphate metabolic process;GO:0030509//BMP signaling pathway;GO:0032870//cellular response to hormone s…	gi|40288197|ref|NP_005248.2|/0/transcription factor GATA-6 [Homo sapiens]
440603	4986	62	111	0.393825769269855	0.906783603825458	1.20320079051592	Up	6.98744e-08	2.9801061002893e-07	BCL2L15	2	GO:0043231//intracellular membrane-bounded organelle;GO:0044444//cytoplasmic part	-	GO:0012501//programmed cell death	gi|58219054|ref|NP_001010922.1|/1.08511e-82/bcl-2-like protein 15 [Homo sapiens]
83706	2570	42	75	0.517584046657079	1.18866943124244	1.19948250226981	Up	9.9317e-06	3.3717463960852e-05	FERMT3	5	GO:0015629//actin cytoskeleton;GO:0044459//plasma membrane part	GO:0005102//receptor binding	GO:0006461//protein complex assembly;GO:0022407//regulation of cell-cell adhesion;GO:0034109//homotypic cell-cell adhesion	gi|28626504|ref|NP_113659.3|/0/fermitin family homolog 3 short form [Homo sapiens]//gi|41281905|ref|NP_848537.1|/0/fermitin family homolog 3 long form [Homo sapiens]
136853	2806	32	57	0.36118277158706	0.827408814363054	1.19587124871743	Up	0.000122527	0.000364981504798788	SRCRB4D	1	-	-	-	gi|18152779|ref|NP_542782.1|/0/scavenger receptor cysteine-rich domain-containing group B protein precursor [Homo sapiens]
29108	782	182	324	7.37104987161679	16.8760658483709	1.19503659723862	Up	4.8385e-20	4.44895548336798e-19	PYCARD	2	GO:0043234//protein complex;GO:0044424//intracellular part;GO:0044444//cytoplasmic part	GO:0004175//endopeptidase activity;GO:0016505//apoptotic protease activator activity;GO:0019904//protein domain specific binding;GO:0042802//identical protein binding	GO:0006915//apoptotic process;GO:0010952//positive regulation of peptidase activity;GO:0012502//induction of programmed cell death;GO:0019221//cytokine-mediated signaling pathway;GO:0019538//protein metabolic process;GO:0032731//positive regulation of interleukin-1 beta production;GO:0051091//positive regulation of sequence-specific DNA binding transcription factor activity	gi|22035620|ref|NP_660183.1|/1.33404e-84/apoptosis-associated speck-like protein containing a CARD isoform b [Homo sapiens]//gi|258588190|pdb|2KN6|A/2.90629e-83/Chain A, Structure Of Full-Length Human Asc (Apoptosis-Associated Speck-Like Protein Containing A Card)
11240	4363	1056	1878	7.66555174958023	17.5324790682692	1.19356846284801	Up	8.3485e-108	3.83618996103896e-106	PADI2	2	GO:0044424//intracellular part	GO:0016813//hydrolase activity, acting on carbon-nitrogen (but not peptide) bonds, in linear amidines;GO:0046872//metal ion binding	GO:0018195//peptidyl-arginine modification	gi|4589632|dbj|BAA76838.1|/0/KIAA0994 protein [Homo sapiens]
29774	5224	187	332	1.1337130687255	2.58861742091194	1.19112620601198	Up	2.1265e-20	1.99047150793651e-19	POM121L9P	1	-	-	-	gi|194380886|dbj|BAG64011.1|/0/unnamed protein product [Homo sapiens]
1308	5610	89	158	0.5024488540526	1.14716841176543	1.1910285517634	Up	1.743876e-10	9.19824398211091e-10	COL17A1	3	GO:0016021//integral to membrane;GO:0030054//cell junction	-	GO:0007044//cell-substrate junction assembly;GO:0009888//tissue development;GO:0031589//cell-substrate adhesion	gi|179517|gb|AAA35605.1|/0/autoantigen, partial [Homo sapiens]
22996	2759	57	101	0.654316496615367	1.49108577633249	1.18830270313975	Up	3.5533e-07	1.4161169249831e-06	TTC39A	1	-	-	-	gi|221307588|ref|NP_001138304.1|/0/tetratricopeptide repeat protein 39A isoform 1 [Homo sapiens]//gi|34191892|gb|AAH28374.1|/0/TTC39A protein [Homo sapiens]
1645	1384	5406	9575	123.709959838742	281.796533686475	1.18769220971768	Up	0	0	AKR1C1	5	GO:0044444//cytoplasmic part	GO:0005496//steroid binding;GO:0016628//oxidoreductase activity, acting on the CH-CH group of donors, NAD or NADP as acceptor;GO:0047023//androsterone dehydrogenase activity	GO:0006692;GO:0008202//steroid metabolic process;GO:0015718//monocarboxylic acid transport;GO:0017085//response to insecticide;GO:0030301//cholesterol transport;GO:0032501//multicellular organismal process;GO:0051259//protein oligomerization;GO:0055092//sterol homeostasis	gi|5453543|ref|NP_001344.2|/0/aldo-keto reductase family 1 member C1 [Homo sapiens]
55647	1530	43	76	0.890106022347864	2.02327593298713	1.18464399329418	Up	1.062132e-05	3.59002239434467e-05	RAB20	1	GO:0043231//intracellular membrane-bounded organelle	GO:0032561//guanyl ribonucleotide binding	GO:0006810//transport;GO:0035556//intracellular signal transduction	gi|8923401|ref|NP_060287.1|/7.19675e-132/ras-related protein Rab-20 [Homo sapiens]
163183	1541	30	53	0.616571335824924	1.40089693471367	1.18401109350737	Up	0.00023884	0.000681173374173787	SYNE4	1	GO:0031301//integral to organelle membrane;GO:0031965//nuclear membrane	GO:0008092//cytoskeletal protein binding	GO:0030859//polarized epithelial cell differentiation	gi|89886475|ref|NP_001034965.1|/0/nesprin-4 [Homo sapiens]
147798	2494	47	83	0.596851271582355	1.35554705361307	1.18343181422198	Up	4.23966e-06	1.50519416134859e-05	TMC4	1	GO:0031224//intrinsic to membrane	-	-	gi|21389589|ref|NP_653287.1|/0/transmembrane channel-like protein 4 isoform 2 [Homo sapiens]//gi|223718080|ref|NP_001138775.1|/0/transmembrane channel-like protein 4 isoform 1 [Homo sapiens]
123036	5030	74	130	0.465938341348306	1.05270896481935	1.1758956819522	Up	1.008062e-08	4.62730276128697e-08	TC2N	1	GO:0043231//intracellular membrane-bounded organelle	-	-	gi|22748725|ref|NP_689545.1|/0/tandem C2 domains nuclear protein [Homo sapiens]
9294	3589	94	165	0.829505194386399	1.87259319148641	1.17471459712086	Up	1.113666e-10	5.95762479770185e-10	S1PR2	3	GO:0031224//intrinsic to membrane	GO:0005488//binding;GO:0045125	GO:0000165//MAPK cascade;GO:0007166//cell surface receptor signaling pathway;GO:0008283//cell proliferation	gi|134244587|ref|NP_004221.3|/0/sphingosine 1-phosphate receptor 2 [Homo sapiens]
80115	2153	49	86	0.720803297674628	1.62699933545876	1.17453614513958	Up	3.26086e-06	1.17610345076453e-05	BAIAP2L2	4	-	GO:0019904//protein domain specific binding;GO:0030674//protein binding, bridging	GO:0023052//signaling;GO:0030035//microspike assembly	gi|113205091|ref|NP_079321.3|/0/brain-specific angiogenesis inhibitor 1-associated protein 2-like protein 2 [Homo sapiens]
100294362	3699	196	343	1.67817193824652	3.77696310835188	1.1703361566103	Up	1.76209e-20	1.65902789728579e-19	LOC100294362	1	-	-	-	gi|119610007|gb|EAW89601.1|/6.66891e-90/hCG2045502 [Homo sapiens]
6943	3249	32	56	0.311935628523635	0.702055215120187	1.17033615661029	Up	0.000182564	0.000530683490634243	TCF21	3	GO:0043231//intracellular membrane-bounded organelle	GO:0001071//nucleic acid binding transcription factor activity;GO:0003677//DNA binding;GO:0005515//protein binding	GO:0001944//vasculature development;GO:0003006//developmental process involved in reproduction;GO:0006355//regulation of transcription, DNA-dependent;GO:0009888//tissue development;GO:0030154//cell differentiation;GO:0048534;GO:0048562//embryonic organ morphogenesis;GO:0048754//branching morphogenesis of an epithelial tube	gi|148672817|gb|EDL04764.1|/3.08658e-69/transcription factor 21, isoform CRA_b [Mus musculus]//gi|148672817|gb|EDL04764.1|/9.5818e-69/transcription factor 21, isoform CRA_b [Mus musculus]
4192	1194	88	154	2.33422684836813	5.25350739806959	1.17033615661029	Up	5.19952e-10	2.64475872110408e-09	MDK	1	-	GO:0005102//receptor binding;GO:0005539//glycosaminoglycan binding	GO:0006950//response to stress;GO:0023052//signaling;GO:0035270//endocrine system development;GO:0048522//positive regulation of cellular process;GO:0048869//cellular developmental process	gi|84311247|gb|ABC55426.1|/1.06776e-72/mutant truncated midkine B [Homo sapiens]//gi|84311247|gb|ABC55426.1|/1.25919e-71/mutant truncated midkine B [Homo sapiens]//gi|84311247|gb|ABC55426.1|/1.46382e-71/mutant truncated midkine B [Homo sapiens]//gi|84311247|gb|ABC55426.1|/1.65826e-71/mutant truncated midkine B [Homo sapiens]//gi|84311247|gb|ABC55426.1|/1.77341e-71/mutant truncated midkine B [Homo…
26232	1724	327	571	6.00724308046269	13.490616630049	1.16718134441745	Up	7.01206e-33	1.01931268249795e-31	FBXO2	5	GO:0030425//dendrite;GO:0031461//cullin-RING ubiquitin ligase complex;GO:0042598;GO:0043231//intracellular membrane-bounded organelle;GO:0044444//cytoplasmic part	GO:0005515//protein binding;GO:0019787//small conjugating protein ligase activity;GO:0030246//carbohydrate binding	GO:0008283//cell proliferation;GO:0016567//protein ubiquitination;GO:0043161//proteasomal ubiquitin-dependent protein catabolic process	gi|15812198|ref|NP_036300.2|/1.48287e-128/F-box only protein 2 [Homo sapiens]
197358	6401	39	68	0.192966311054221	0.432707118270954	1.16504185694078	Up	3.95838e-05	0.000125655303391351	NLRC3	2	GO:0044424//intracellular part	GO:0032559	GO:0007243//intracellular protein kinase cascade;GO:0043433//negative regulation of sequence-specific DNA binding transcription factor activity;GO:0046649//lymphocyte activation	gi|119605757|gb|EAW85351.1|/0/NOD3 protein, isoform CRA_d [Homo sapiens]
644019	1719	69	120	1.27127038136375	2.84340238584578	1.16134737338303	Up	5.05344e-08	2.18369338153395e-07	CBWD6	1	-	GO:0032559	-	gi|146231952|ref|NP_001078926.1|/0/COBW domain-containing protein 6 [Homo sapiens]
4072	1731	53	92	0.969713666682631	2.16482958076612	1.1586227360465	Up	1.924368e-06	7.09102151385128e-06	EPCAM	2	GO:0031224//intrinsic to membrane;GO:0043296//apical junction complex	GO:0005488//binding	GO:0008283//cell proliferation;GO:0035295//tube development	gi|218505670|ref|NP_002345.2|/7.34181e-152/epithelial cell adhesion molecule precursor [Homo sapiens]
6094	1894	68	118	1.13708689085572	2.5376690722885	1.15816144266419	Up	6.97554e-08	2.97646594645441e-07	ROM1	3	GO:0016021//integral to membrane	-	GO:0009987//cellular process;GO:0050953//sensory perception of light stimulus	gi|143745282|sp|Q03395.2|ROM1_HUMAN/1.83427e-143/RecName: Full=Rod outer segment membrane protein 1; Short=ROSP1; AltName: Full=Tetraspanin-23; Short=Tspan-23
84680	2196	650	1122	9.3744486722683	20.8110252080438	1.15054228724566	Up	1.580136e-61	4.30064399630769e-60	ACCS	1	-	GO:0016740//transferase activity;GO:0016846//carbon-sulfur lyase activity;GO:0042802//identical protein binding;GO:0048037//cofactor binding	GO:0008652//cellular amino acid biosynthetic process	gi|14211921|ref|NP_115981.1|/0/1-aminocyclopropane-1-carboxylate synthase-like protein 1 [Homo sapiens]
402778	3721	384	662	3.26840803141077	7.24654967356449	1.14870614063875	Up	6.2335e-37	1.02108193055556e-35	IFITM10	3	GO:0031224//intrinsic to membrane	-	GO:0050896//response to stimulus	gi|334848153|ref|NP_001164291.2|/1.02736e-114/interferon-induced transmembrane protein 10 [Homo sapiens]
6820	1281	152	262	3.75802074246536	8.33076944920929	1.14847672264655	Up	1.418716e-15	1.03927555925466e-14	SULT2B1	1	GO:0044444//cytoplasmic part	GO:0005488//binding;GO:0008146//sulfotransferase activity	GO:0006629//lipid metabolic process;GO:0006790//sulfur compound metabolic process	gi|1923291|gb|AAC78498.1|/1.92804e-172/hydroxysteroid sulfotransferase SULT2B1a [Homo sapiens]//gi|31563386|ref|NP_814444.1|/1.29827e-178/sulfotransferase family cytosolic 2B member 1 isoform b [Homo sapiens]
26154	9112	32	55	0.111224633129202	0.245856634629966	1.14434094807735	Up	0.000270466	0.000766797116346154	ABCA12	3	GO:0031224//intrinsic to membrane	GO:0017111//nucleoside-triphosphatase activity;GO:0032559	GO:0009987//cellular process;GO:0010876//lipid localization;GO:0051234//establishment of localization	gi|27881501|ref|NP_056472.2|/0/ATP-binding cassette sub-family A member 12 isoform b [Homo sapiens]//gi|30795238|ref|NP_775099.2|/0/ATP-binding cassette sub-family A member 12 isoform a [Homo sapiens]
10581	738	1451	2489	62.2695554544945	137.373033620803	1.14149994546698	Up	1.659306e-132	9.11639206397515e-131	IFITM2	2	GO:0031224//intrinsic to membrane	GO:0005488//binding	GO:0002376//immune system process;GO:0006952//defense response;GO:0019221//cytokine-mediated signaling pathway;GO:0051707//response to other organism	gi|151101191|ref|NP_006426.2|/6.03332e-64/interferon-induced transmembrane protein 2 [Homo sapiens]
10693	1898	56	96	0.934451000989597	2.06019334089311	1.14058881321624	Up	1.565236e-06	5.81979614880202e-06	CCT6B	1	GO:0044424//intracellular part	GO:0005515//protein binding;GO:0022892;GO:0032559	GO:0006810//transport;GO:0043623//cellular protein complex assembly;GO:0044267//cellular protein metabolic process;GO:0048232//male gamete generation	gi|119600607|gb|EAW80201.1|/0/chaperonin containing TCP1, subunit 6B (zeta 2) [Homo sapiens]//gi|302058290|ref|NP_001180458.1|/0/T-complex protein 1 subunit zeta-2 isoform 2 [Homo sapiens] //gi|302058292|ref|NP_001180459.1|/0/T-complex protein 1 subunit zeta-2 isoform 3 [Homo sapiens]
26052	7659	59	101	0.243974623675268	0.537133523554162	1.13854966794264	Up	8.6836e-07	3.30795795865633e-06	DNM3	3	GO:0015630//microtubule cytoskeleton;GO:0030425//dendrite;GO:0043231//intracellular membrane-bounded organelle;GO:0044430//cytoskeletal part;GO:0044444//cytoplasmic part	GO:0017111//nucleoside-triphosphatase activity;GO:0032561//guanyl ribonucleotide binding	GO:0007399//nervous system development;GO:0009207;GO:0016192//vesicle-mediated transport;GO:0030035//microspike assembly	gi|20521666|dbj|BAA74843.2|/0/KIAA0820 protein [Homo sapiens]
51226	923	175	299	6.00483477748597	13.1947887475569	1.13577179691847	Up	2.8414e-17	2.28279779291553e-16	COPZ2	2	GO:0005798//Golgi-associated vesicle;GO:0030120//vesicle coat	-	GO:0015031//protein transport	gi|7705983|ref|NP_057513.1|/1.37246e-96/coatomer subunit zeta-2 [Homo sapiens]
6274	738	554	946	23.7748681749069	52.2116873464361	1.1349354418429	Up	4.67878e-51	1.05846927084399e-49	S100A3	1	-	GO:0046872//metal ion binding	-	gi|119573693|gb|EAW53308.1|/5.13126e-47/S100 calcium binding protein A3, isoform CRA_b [Homo sapiens]
9737	5997	41	70	0.216528228385051	0.47544134440668	1.13471224687957	Up	4.45586e-05	0.000140264447081851	GPRASP1	1	GO:0043231//intracellular membrane-bounded organelle	GO:0005488//binding	-	gi|58257650|dbj|BAA23715.3|/0/KIAA0443 [Homo sapiens]
5081	6053	74	126	0.387191451673878	0.847876943058376	1.13080779242365	Up	4.6199e-08	2.00369332924736e-07	PAX7	2	GO:0043231//intracellular membrane-bounded organelle	GO:0001071//nucleic acid binding transcription factor activity;GO:0003677//DNA binding	GO:0001501//skeletal system development;GO:0006351//transcription, DNA-dependent;GO:0009953//dorsal/ventral pattern formation;GO:0014816//satellite cell differentiation;GO:0021515//cell differentiation in spinal cord;GO:0042246//tissue regeneration;GO:0043066//negative regulation of apoptotic process;GO:0045165//cell fate commitment;GO:0048729//tissue morphogenesis	gi|207029223|ref|NP_001128726.1|/0/paired box protein Pax-7 isoform 3 [Homo sapiens] //gi|4505619|ref|NP_002575.1|/0/paired box protein Pax-7 isoform 1 [Homo sapiens]//gi|7524359|ref|NP_039236.1|/0/paired box protein Pax-7 isoform 2 [Homo sapiens]
5145	5659	37	63	0.207074558842727	0.453454597661455	1.13080779242365	Up	0.0001126388	0.000337401457974941	PDE6A	2	GO:0016020//membrane;GO:0044444//cytoplasmic part	GO:0004114//3',5'-cyclic-nucleotide phosphodiesterase activity;GO:0043169//cation binding	GO:0001775//cell activation;GO:0006874//cellular calcium ion homeostasis;GO:0007599//hemostasis;GO:0009167//purine ribonucleoside monophosphate metabolic process;GO:0023052//signaling;GO:0048856//anatomical structure development;GO:0050953//sensory perception of light stimulus	gi|170650674|ref|NP_000431.2|/0/rod cGMP-specific 3',5'-cyclic phosphodiesterase subunit alpha [Homo sapiens]
828	1613	243	413	4.77129886602622	10.4291433851212	1.12816670236635	Up	5.01364e-23	5.20823871051086e-22	CAPS	2	GO:0044424//intracellular part	GO:0046872//metal ion binding	GO:0007165//signal transduction	gi|119589532|gb|EAW69126.1|/2.84107e-134/calcyphosine, isoform CRA_b [Homo sapiens] //gi|119589534|gb|EAW69128.1|/1.0116e-117/calcyphosine, isoform CRA_d [Homo sapiens]
441150	572	133	226	7.36411101348052	16.0933095350637	1.12787776146669	Up	2.73762e-13	1.74338500431965e-12	C6orf226	1	-	-	-	gi|56806675|ref|NP_001008739.1|/3.9862e-28/uncharacterized protein C6orf226 [Homo sapiens]
2941	1352	249	423	5.83293813358101	12.7437320058971	1.12749315560456	Up	1.594758e-23	1.69446629297297e-22	GSTA4	3	GO:0044444//cytoplasmic part	GO:0016765//transferase activity, transferring alkyl or aryl (other than methyl) groups;GO:0042802//identical protein binding	GO:0006790//sulfur compound metabolic process	gi|4504173|ref|NP_001503.1|/6.75992e-123/glutathione S-transferase A4 [Homo sapiens]
3914	4339	2423	4109	17.6859534936663	38.5726472180877	1.124974160269	Up	2.19244e-212	1.95891192121212e-210	LAMB3	1	GO:0043256//laminin complex	GO:0005515//protein binding	GO:0007044//cell-substrate junction assembly;GO:0009888//tissue development;GO:0045444//fat cell differentiation	gi|62868215|ref|NP_000219.2|/0/laminin subunit beta-3 precursor [Homo sapiens]
643596	1514	69	117	1.44340408557746	3.14769714909986	1.12482149735793	Up	1.574472e-07	6.4927701986014e-07	RNF224	1	-	GO:0046872//metal ion binding	-	gi|298160964|ref|NP_001177157.1|/5.17168e-74/RING finger protein 224 [Homo sapiens]
53630	2446	115	195	1.48903910163824	3.24721551085935	1.12482149735792	Up	1.272606e-11	7.26716357198192e-11	BCMO1	2	GO:0044444//cytoplasmic part	GO:0016702//oxidoreductase activity, acting on single donors with incorporation of molecular oxygen, incorporation of two atoms of oxygen;GO:0043169//cation binding	GO:0016101//diterpenoid metabolic process	gi|74027270|ref|NP_059125.2|/0/beta,beta-carotene 15,15'-monooxygenase [Homo sapiens]
196410	1531	65	110	1.34463026024175	2.92651293892652	1.1219731350489	Up	3.90268e-07	1.54768688365837e-06	METTL7B	2	GO:0031090//organelle membrane;GO:0044444//cytoplasmic part	GO:0016741	GO:0006730//one-carbon metabolic process	gi|37182139|gb|AAQ88872.1|/2.90832e-149/DILV594 [Homo sapiens]
10437	1051	512	866	15.4287932570624	33.5620229566989	1.12120444927942	Up	5.27196e-46	1.07449590276498e-44	IFI30	3	GO:0000323//lytic vacuole;GO:0044459//plasma membrane part	GO:0016491//oxidoreductase activity	GO:0002474//antigen processing and presentation of peptide antigen via MHC class I;GO:0008152//metabolic process;GO:0019221//cytokine-mediated signaling pathway	gi|307042|gb|AAA36105.1|/9.22454e-144/gamma-interferon-inducible protein precursor [Homo sapiens]
154791	1210	151	255	3.95235814612775	8.5839615621458	1.11892993208647	Up	1.241762e-14	8.57790376493557e-14	C7orf55	1	GO:0043231//intracellular membrane-bounded organelle	-	-	gi|6841186|gb|AAF28946.1|AF161386_1/1.18608e-36/HSPC268 [Homo sapiens]//gi|6841186|gb|AAF28946.1|AF161386_1/3.32279e-36/HSPC268 [Homo sapiens]//gi|6841186|gb|AAF28946.1|AF161386_1/3.92104e-36/HSPC268 [Homo sapiens]//gi|6841186|gb|AAF28946.1|AF161386_1/5.95381e-68/HSPC268 [Homo sapiens]
23424	3785	897	1510	7.50570124500281	16.2496502397975	1.11434989384587	Up	4.18092e-78	1.40617216197719e-76	TDRD7	2	GO:0030529//ribonucleoprotein complex;GO:0043232;GO:0044429//mitochondrial part	GO:0005515//protein binding	GO:0003006//developmental process involved in reproduction	gi|112293287|ref|NP_055105.2|/0/tudor domain-containing protein 7 [Homo sapiens]
205860	1300	951	1600	23.168711372036	50.1313712950657	1.11353589346685	Up	1.493102e-82	5.27234879880239e-81	TRIML2	1	-	GO:0003824//catalytic activity	-	gi|27734883|ref|NP_775824.1|/0/probable E3 ubiquitin-protein ligase TRIML2 [Homo sapiens]
51085	3288	106	177	1.0210306307954	2.19267574038067	1.10266633007249	Up	2.18516e-10	1.14643136298932e-09	MLXIPL	2	GO:0031981//nuclear lumen;GO:0043234//protein complex;GO:0044444//cytoplasmic part	GO:0001071//nucleic acid binding transcription factor activity;GO:0042802//identical protein binding;GO:0046983//protein dimerization activity	GO:0001933//negative regulation of protein phosphorylation;GO:0002082//regulation of oxidative phosphorylation;GO:0006110//regulation of glycolysis;GO:0006633//fatty acid biosynthetic process;GO:0007050//cell cycle arrest;GO:0008283//cell proliferation;GO:0009757//hexose mediated signaling;GO:0015980//energy derivation by oxidation of organic compounds;GO:0032502//developmental process;GO:0033500…	gi|14602433|ref|NP_116569.1|/0/carbohydrate-responsive element-binding protein isoform alpha [Homo sapiens]//gi|14602435|ref|NP_116570.1|/0/carbohydrate-responsive element-binding protein isoform beta [Homo sapiens]//gi|14602437|ref|NP_116571.1|/0/carbohydrate-responsive element-binding protein isoform gamma [Homo sapiens]//gi|14602439|ref|NP_116572.1|/0/carbohydrate-responsive element-binding pr…
145553	808	105	175	4.11568997496501	8.82184945051628	1.0999468287189	Up	2.99514e-10	1.55661050940071e-09	MDP1	1	-	GO:0004721//phosphoprotein phosphatase activity;GO:0043169//cation binding	GO:0006040//amino sugar metabolic process;GO:0006796//phosphate-containing compound metabolic process	gi|315259107|ref|NP_001186750.1|/4.8188e-68/magnesium-dependent phosphatase 1 isoform 2 [Homo sapiens]//gi|33457311|ref|NP_612485.2|/1.52005e-97/magnesium-dependent phosphatase 1 isoform 1 [Homo sapiens]//gi|33457311|ref|NP_612485.2|/2.29276e-94/magnesium-dependent phosphatase 1 isoform 1 [Homo sapiens]
100505817	1181	617	1028	16.5462652099444	35.4548923574967	1.09947910459715	Up	1.247626e-52	2.93117550677291e-51	LOC100505817	1	-	-	-	gi|119578120|gb|EAW57716.1|/5.9664e-32/hCG2038825, isoform CRA_b [Homo sapiens]
202781	2275	146	243	2.03252627929533	4.35068686596463	1.09796917927846	Up	1.236668e-13	8.00801375841874e-13	LOC202781	1	-	-	-	gi|119604242|gb|EAW83836.1|/2.07314e-27/hCG2014340 [Homo sapiens]
27344	990	536	892	17.1472432888663	36.6997084304029	1.09779194401522	Up	8.61592e-46	1.74398444759725e-44	PCSK1N	2	GO:0005576//extracellular region;GO:0005794//Golgi apparatus	GO:0004866//endopeptidase inhibitor activity	GO:0008152//metabolic process;GO:0032501//multicellular organismal process;GO:0050789//regulation of biological process;GO:0050896//response to stimulus	gi|7019519|ref|NP_037403.1|/1.88422e-70/proSAAS precursor [Homo sapiens]
201299	1166	65	108	1.76554796606357	3.77275114163123	1.0955009236877	Up	8.19962e-07	3.13709942517301e-06	RDM1	1	GO:0016604//nuclear body	GO:0003676//nucleic acid binding	GO:0006259//DNA metabolic process	gi|154813772|gb|ABS86951.1|/5.74627e-75/RDM1 isoform beta [Homo sapiens]//gi|21717826|ref|NP_663629.1|/1.13612e-160/RAD52 motif-containing protein 1 isoform 1 [Homo sapiens]//gi|253314443|ref|NP_001156592.1|/2.03556e-87/RAD52 motif-containing protein 1 isoform 3 [Homo sapiens]//gi|253314443|ref|NP_001156592.1|/4.81485e-92/RAD52 motif-containing protein 1 isoform 3 [Homo sapiens]//gi|253314445|ref…
168544	2295	188	312	2.59441755351005	5.53738676396477	1.0937946017373	Up	5.56368e-17	4.38818826928221e-16	ZNF467	1	GO:0043231//intracellular membrane-bounded organelle	GO:0003676//nucleic acid binding;GO:0046914//transition metal ion binding	GO:0006351//transcription, DNA-dependent	gi|119600440|gb|EAW80034.1|/0/zinc finger protein 467, isoform CRA_c [Homo sapiens]
2634	2595	235	390	2.86810611045548	6.12153305553909	1.0937946017373	Up	7.74442e-21	7.44600729456522e-20	GBP2	3	GO:0016020//membrane	GO:0017111//nucleoside-triphosphatase activity;GO:0032561//guanyl ribonucleotide binding	GO:0002376//immune system process;GO:0009207;GO:0019221//cytokine-mediated signaling pathway	gi|38327558|ref|NP_004111.2|/0/interferon-induced guanylate-binding protein 2 [Homo sapiens]
92960	1086	108	179	3.14962351991008	6.713610785199	1.09190950965348	Up	2.4098e-10	1.26166829831311e-09	PEX11G	1	GO:0031224//intrinsic to membrane;GO:0044439	-	-	gi|18087833|ref|NP_542393.1|/1.30303e-107/peroxisomal membrane protein 11C isoform 1 [Homo sapiens]//gi|395627636|ref|NP_001257468.1|/6.57095e-80/peroxisomal membrane protein 11C isoform 2 [Homo sapiens]
3689	2977	200	331	2.12772685814849	4.52878927365359	1.08981245158518	Up	7.98672e-18	6.58708920839161e-17	ITGB2	1	GO:0005887//integral to plasma membrane	GO:0004871//signal transducer activity;GO:0019900//kinase binding	GO:0001932//regulation of protein phosphorylation;GO:0002682//regulation of immune system process;GO:0006952//defense response;GO:0007154//cell communication;GO:0007166//cell surface receptor signaling pathway;GO:0007599//hemostasis;GO:0012501//programmed cell death;GO:0016337//cell-cell adhesion;GO:0030595//leukocyte chemotaxis;GO:0031589//cell-substrate adhesion	gi|89191865|ref|NP_000202.2|/0/integrin beta-2 precursor [Homo sapiens]
4680	2631	663	1097	7.98100154693546	16.9831690906246	1.0894639848433	Up	3.08912e-55	7.5587305560166e-54	CEACAM6	4	GO:0005626//insoluble fraction;GO:0016021//integral to membrane;GO:0044459//plasma membrane part	-	GO:0007154//cell communication;GO:0007166//cell surface receptor signaling pathway;GO:0016337//cell-cell adhesion;GO:0048646//anatomical structure formation involved in morphogenesis;GO:0048870//cell motility	gi|40255013|ref|NP_002474.3|/0/carcinoembryonic antigen-related cell adhesion molecule 6 precursor [Homo sapiens]
80161	2319	234	387	3.19580170002088	6.7974053736922	1.0888062711137	Up	1.511748e-20	1.42788755301655e-19	ASMTL-AS1	1	GO:0034399//nuclear periphery	GO:0005488//binding	GO:0000122//negative regulation of transcription from RNA polymerase II promoter;GO:0007599//hemostasis	gi|18152887|gb|AAG22471.2|AF193043_1/1.80282e-84/unknown [Homo sapiens]//gi|74733869|sp|Q9H8Q0.1|CXY02_HUMAN/1.48482e-97/RecName: Full=Putative uncharacterized protein encoded by NCRNA00105
25939	3189	533	881	5.29343280436719	11.2526378849637	1.08798772071393	Up	1.294772e-44	2.54792118487208e-43	SAMHD1	3	GO:0043231//intracellular membrane-bounded organelle	GO:0003824//catalytic activity	GO:0002252;GO:0031347//regulation of defense response	gi|38016914|ref|NP_056289.2|/0/SAM domain and HD domain-containing protein 1 [Homo sapiens]
284021	1488	86	142	1.83045996531214	3.887034249441	1.08646359935527	Up	1.94743e-08	8.69999599242424e-08	MILR1	1	GO:0031224//intrinsic to membrane	-	-	gi|194374637|dbj|BAG62433.1|/0/unnamed protein product [Homo sapiens]
100130933	842	43	71	1.61741355604778	3.43462408739204	1.08646359935527	Up	7.2124e-05	0.000221441458521347	C17orf110	1	-	-	-	gi|119609703|gb|EAW89297.1|/1.78704e-28/hCG1643808 [Homo sapiens]
619190	4981	127	209	0.807517408955956	1.7090812061922	1.08165567986141	Up	1.11645e-11	6.40230695299838e-11	FDPSL2A	1	GO:0031981//nuclear lumen;GO:0044444//cytoplasmic part	GO:0004659//prenyltransferase activity;GO:0043169//cation binding	GO:0006720//isoprenoid metabolic process;GO:0008203//cholesterol metabolic process;GO:0051704	gi|383409167|gb|AFH27797.1|/4.91031e-168/farnesyl pyrophosphate synthase isoform a [Macaca mulatta]
51056	2100	1587	2611	23.9343890799897	50.6431290437028	1.08128156403035	Up	2.54186e-127	1.33833468035714e-125	LAP3	2	GO:0031981//nuclear lumen;GO:0044431//Golgi apparatus part	GO:0008237//metallopeptidase activity;GO:0008238//exopeptidase activity;GO:0046914//transition metal ion binding	GO:0019538//protein metabolic process	gi|41393561|ref|NP_056991.2|/0/cytosol aminopeptidase [Homo sapiens]
8775	1865	2176	3579	36.9525803115194	78.1656270859759	1.08085922171873	Up	1.144458e-173	8.26392101142857e-172	NAPA	3	GO:0031201//SNARE complex;GO:0044444//cytoplasmic part	GO:0000149//SNARE binding	GO:0007270//neuron-neuron synaptic transmission;GO:0007417//central nervous system development;GO:0008105//asymmetric protein localization;GO:0015031//protein transport;GO:0016044//cellular membrane organization;GO:0016082//synaptic vesicle priming;GO:0030154//cell differentiation;GO:0048193//Golgi vesicle transport	gi|47933379|ref|NP_003818.2|/1.05679e-107/alpha-soluble NSF attachment protein [Homo sapiens]//gi|47933379|ref|NP_003818.2|/1.69588e-149/alpha-soluble NSF attachment protein [Homo sapiens]//gi|47933379|ref|NP_003818.2|/2.19168e-149/alpha-soluble NSF attachment protein [Homo sapiens]
118491	3714	45	74	0.383738460624478	0.81156400083894	1.08058150385197	Up	5.4733e-05	0.00017053214212751	TTC18	3	-	-	-	gi|229577238|ref|NP_660153.3|/0/tetratricopeptide repeat protein 18 [Homo sapiens]
55080	1834	154	253	2.65941493983926	5.61893675672952	1.0791882685521	Up	8.79316e-14	5.77216302634508e-13	TAPBPL	4	GO:0031090//organelle membrane;GO:0031224//intrinsic to membrane;GO:0042598;GO:0043231//intracellular membrane-bounded organelle	-	GO:0002474//antigen processing and presentation of peptide antigen via MHC class I	gi|157739930|ref|NP_060479.3|/0/tapasin-related protein precursor [Homo sapiens]
442213	3268	39	64	0.377961247569789	0.797683998575096	1.07757901569044	Up	0.00018199	0.000529275865526878	PTCHD4	3	GO:0031224//intrinsic to membrane	GO:0004888//transmembrane signaling receptor activity	-	gi|257743475|ref|NP_001013754.3|/0/patched domain-containing protein 4 isoform 1 [Homo sapiens]//gi|301129184|ref|NP_997382.2|/1.00072e-174/patched domain-containing protein 4 isoform 2 [Homo sapiens]
8601	2120	224	365	3.34639245260048	7.01277584891175	1.06737896626247	Up	6.7991e-19	5.92234751846381e-18	RGS20	3	GO:0016020//membrane;GO:0043231//intracellular membrane-bounded organelle;GO:0044424//intracellular part	GO:0005488//binding;GO:0008047//enzyme activator activity	GO:0007186//G-protein coupled receptor signaling pathway	gi|13654235|ref|NP_003693.2|/2.46709e-91/regulator of G-protein signaling 20 isoform b [Homo sapiens]//gi|41281805|ref|NP_733466.1|/1.50627e-141/regulator of G-protein signaling 20 isoform a [Homo sapiens]
400236	1086	51	83	1.48732221773532	3.11301505682412	1.06559532392812	Up	2.39254e-05	7.78775071573137e-05	LOC400236	1	-	-	-	gi|119601813|gb|EAW81407.1|/2.4524e-13/hCG2040407 [Homo sapiens]
3993	3590	1528	2486	13.4801157173397	28.205878438613	1.06516298756942	Up	2.06994e-118	1.01438527811634e-116	LLGL2	1	GO:0043227//membrane-bounded organelle;GO:0044424//intracellular part	GO:0019904//protein domain specific binding	GO:0007163//establishment or maintenance of cell polarity;GO:0016192//vesicle-mediated transport	gi|62739161|ref|NP_004515.2|/0/lethal(2) giant larvae protein homolog 2 isoform a [Homo sapiens]//gi|62739163|ref|NP_001015002.1|/0/lethal(2) giant larvae protein homolog 2 isoform b [Homo sapiens]//gi|73427803|ref|NP_001026973.1|/0/lethal(2) giant larvae protein homolog 2 isoform c [Homo sapiens]
3426	2171	181	294	2.6404835492035	5.51595178171756	1.06280769230585	Up	2.02994e-15	1.47360149938449e-14	CFI	3	GO:0044421//extracellular region part;GO:0044464//cell part	GO:0004175//endopeptidase activity;GO:0004888//transmembrane signaling receptor activity	GO:0002455//humoral immune response mediated by circulating immunoglobulin;GO:0006952//defense response;GO:0019538//protein metabolic process	gi|339961198|pdb|2XRC|A/0/Chain A, Human Complement Factor I
5187	4717	237	384	1.5912821253337	3.31587615943619	1.05920048637558	Up	1.443748e-19	1.29849241830198e-18	PER1	2	GO:0043231//intracellular membrane-bounded organelle	GO:0005488//binding	GO:0000122//negative regulation of transcription from RNA polymerase II promoter;GO:0009605//response to external stimulus;GO:0048511//rhythmic process	gi|194097341|ref|NP_002607.2|/0/period circadian protein homolog 1 [Homo sapiens]
378108	1351	50	81	1.17213968480904	2.4420953910855	1.05897504766259	Up	3.29402e-05	0.00010543605540076	TRIM74	1	GO:0043227//membrane-bounded organelle;GO:0044424//intracellular part	GO:0003824//catalytic activity;GO:0046914//transition metal ion binding	-	gi|38524612|ref|NP_942150.1|/1.14144e-146/tripartite motif-containing protein 74 [Homo sapiens]
728743	3369	363	588	3.41248168148564	7.10901235862797	1.0588278413933	Up	4.31272e-29	5.63904874501109e-28	LOC728743	1	-	-	-	gi|297289638|ref|XP_001098218.2|/3.73286e-99/PREDICTED: zinc finger protein 615-like [Macaca mulatta]
151009	2204	163	264	2.34229034855584	4.87893790507785	1.05864719968006	Up	6.4278e-14	4.25736464994384e-13	LOC151009	1	GO:0043231//intracellular membrane-bounded organelle	GO:0003676//nucleic acid binding;GO:0046914//transition metal ion binding	-	gi|119571215|gb|EAW50830.1|/2.26261e-55/hCG1980350 [Homo sapiens]
8436	3265	83	134	0.805118157897042	1.67168546699855	1.05403099366354	Up	1.026488e-07	4.30730531499051e-07	SDPR	5	GO:0044444//cytoplasmic part;GO:0044459//plasma membrane part	GO:0005543//phospholipid binding	GO:0006357//regulation of transcription from RNA polymerase II promoter	gi|158261779|dbj|BAF83067.1|/0/unnamed protein product [Homo sapiens]
140701	1776	98	158	1.74762331069085	3.62365697635364	1.05205213861458	Up	7.90318e-09	3.66199993137768e-08	ABHD16B	3	-	GO:0003824//catalytic activity	-	gi|119595608|gb|EAW75202.1|/0/hCG1647005 [Homo sapiens]
440498	766	165	266	6.82212840311246	14.1444420641594	1.05194145580807	Up	6.9862e-14	4.61339545352743e-13	HSBP1L1	1	GO:0044423	GO:0005102//receptor binding	-	gi|209969760|ref|NP_001129652.1|/7.06221e-34/heat shock factor-binding protein 1-like protein 1 [Homo sapiens]
1520	4107	468	753	3.60899154728436	7.46798139772641	1.04912256964121	Up	2.96174e-36	4.73316552303523e-35	CTSS	1	GO:0000323//lytic vacuole	GO:0004175//endopeptidase activity	GO:0002376//immune system process;GO:0019538//protein metabolic process	gi|23110962|ref|NP_004070.3|/0/cathepsin S isoform 1 preproprotein [Homo sapiens]//gi|315075311|ref|NP_001186668.1|/3.84872e-160/cathepsin S isoform 2 preproprotein [Homo sapiens]
29943	3847	155	249	1.27606920040258	2.63639278792123	1.04685876134654	Up	5.3587e-13	3.35934662296244e-12	PADI1	2	GO:0044424//intracellular part	GO:0016813//hydrolase activity, acting on carbon-nitrogen (but not peptide) bonds, in linear amidines;GO:0046872//metal ion binding	GO:0018195//peptidyl-arginine modification	gi|122056685|ref|NP_037490.2|/0/protein-arginine deiminase type-1 [Homo sapiens]
11156	1396	193	310	4.37861343604819	9.04501371414374	1.04664860255885	Up	8.24428e-16	6.13070859520807e-15	PTP4A3	1	GO:0005768//endosome;GO:0016020//membrane	GO:0004725//protein tyrosine phosphatase activity;GO:0005515//protein binding	GO:0006470//protein dephosphorylation	gi|14589854|ref|NP_009010.2|/7.82193e-84/protein tyrosine phosphatase type IVA 3 isoform 2 [Homo sapiens]//gi|14589856|ref|NP_116000.1|/1.3449e-97/protein tyrosine phosphatase type IVA 3 isoform 1 [Homo sapiens]
79095	723	766	1228	33.5548411358117	69.1819857671532	1.04387549799791	Up	1.48281e-57	3.75284573819742e-56	C9orf16	3	-	-	-	gi|67970629|dbj|BAE01657.1|/6.44506e-31/unnamed protein product [Macaca fascicularis]
874	1128	308	493	8.64781382919362	17.8020810411168	1.0416385302357	Up	4.83358e-24	5.23963626102941e-23	CBR3	3	GO:0031981//nuclear lumen;GO:0044444//cytoplasmic part	GO:0016616//oxidoreductase activity, acting on the CH-OH group of donors, NAD or NADP as acceptor;GO:0050661//NADP binding	GO:0042374	gi|4502601|ref|NP_001227.1|/1.23871e-156/carbonyl reductase [NADPH] 3 [Homo sapiens]
8626	4927	57	91	0.366401301839212	0.752301251294686	1.03788586058664	Up	1.496536e-05	4.97374006687958e-05	TP63	1	GO:0005792//microsome;GO:0031981//nuclear lumen;GO:0043005//neuron projection;GO:0043234//protein complex;GO:0044427//chromosomal part;GO:0044444//cytoplasmic part	GO:0001071//nucleic acid binding transcription factor activity;GO:0005515//protein binding;GO:0043169//cation binding;GO:0043565//sequence-specific DNA binding;GO:0043566//structure-specific DNA binding	GO:0000077//DNA damage checkpoint;GO:0001655//urogenital system development;GO:0001738//morphogenesis of a polarized epithelium;GO:0001942//hair follicle development;GO:0002067;GO:0003002//regionalization;GO:0007267//cell-cell signaling;GO:0007569//cell aging;GO:0008284//positive regulation of cell proliferation;GO:0008593//regulation of Notch signaling pathway;GO:0008630//intrinsic apoptotic sig…	gi|169234657|ref|NP_001108450.1|/0/tumor protein 63 isoform 2 [Homo sapiens]//gi|169234659|ref|NP_001108451.1|/0/tumor protein 63 isoform 3 [Homo sapiens]//gi|169234661|ref|NP_001108452.1|/0/tumor protein 63 isoform 4 [Homo sapiens]//gi|169234665|ref|NP_001108454.1|/0/tumor protein 63 isoform 6 [Homo sapiens]//gi|31543818|ref|NP_003713.3|/0/tumor protein 63 isoform 1 [Homo sapiens]//gi|7248450|gb…
646074	9547	94	150	0.31183556537685	0.639966573435229	1.03721107337093	Up	2.7461e-08	1.21331805944056e-07	POM121L10P	1	-	-	-	gi|194380164|dbj|BAG63849.1|/0/unnamed protein product [Homo sapiens]
100533955	4303	278	443	2.0461532816231	4.19339076354118	1.0352030503842	Up	1.464828e-21	1.45667634333895e-20	SENP3-EIF4A1	1	GO:0035097//histone methyltransferase complex	GO:0005488//binding;GO:0019783//small conjugating protein-specific protease activity	GO:0019538//protein metabolic process	gi|119610576|gb|EAW90170.1|/0/SUMO1/sentrin/SMT3 specific peptidase 3, isoform CRA_a [Homo sapiens]
79411	2505	184	293	2.32634867392072	4.76423136883496	1.03417613291793	Up	9.23166e-15	6.42981484488189e-14	GLB1L	3	-	GO:0016798//hydrolase activity, acting on glycosyl bonds;GO:0043167//ion binding	GO:0044238//primary metabolic process	gi|40255043|ref|NP_078782.3|/0/beta-galactosidase-1-like protein precursor [Homo sapiens]
9963	2378	83	132	1.10542926220935	2.26097122430437	1.03233592256422	Up	2.07764e-07	8.4573238011965e-07	SLC23A1	3	GO:0005626//insoluble fraction;GO:0016021//integral to membrane;GO:0016323//basolateral plasma membrane;GO:0043226//organelle;GO:0044424//intracellular part	GO:0005488//binding;GO:0015229//L-ascorbic acid transporter activity;GO:0015370//solute:sodium symporter activity;GO:0015932//nucleobase-containing compound transmembrane transporter activity	GO:0006766//vitamin metabolic process;GO:0007417//central nervous system development;GO:0015882//L-ascorbic acid transport;GO:0015931//nucleobase-containing compound transport;GO:0030323//respiratory tube development;GO:0034641//cellular nitrogen compound metabolic process;GO:0035725//sodium ion transmembrane transport;GO:0042221//response to chemical stimulus	gi|44680143|ref|NP_689898.2|/0/solute carrier family 23 member 1 isoform b [Homo sapiens]//gi|44680145|ref|NP_005838.3|/0/solute carrier family 23 member 1 isoform a [Homo sapiens]
10161	3043	112	178	1.16568386452728	2.3825992683368	1.03135974346148	Up	1.685116e-09	8.21929615550041e-09	LPAR6	1	GO:0031224//intrinsic to membrane	GO:0001608	GO:0035588	gi|33695113|ref|NP_005758.2|/0/lysophosphatidic acid receptor 6 [Homo sapiens]
9196	2458	101	160	1.30138024517395	2.65137439721666	1.02669784668826	Up	1.261716e-08	5.74395721976325e-08	KCNAB3	3	GO:0031224//intrinsic to membrane;GO:0044424//intracellular part	GO:0003824//catalytic activity;GO:0005267//potassium channel activity;GO:0016247//channel regulator activity	GO:0008152//metabolic process;GO:0030001//metal ion transport	gi|27436971|ref|NP_004723.2|/0/voltage-gated potassium channel subunit beta-3 [Homo sapiens]
8972	6513	72	114	0.350119365640243	0.712946148657371	1.02594624727512	Up	1.585306e-06	5.89070540768746e-06	MGAM	2	GO:0031224//intrinsic to membrane;GO:0044459//plasma membrane part	GO:0004558//alpha-glucosidase activity;GO:0005488//binding	GO:0005982//starch metabolic process;GO:0007586//digestion	gi|221316699|ref|NP_004659.2|/0/maltase-glucoamylase, intestinal [Homo sapiens]
100506730	2490	43	68	0.546932616141459	1.1123527164869	1.02417932110093	Up	0.00021512	0.000618911679947959	LOC100506730	1	-	-	-	gi|18677064|dbj|BAB85089.1|/9.91078e-63/unnamed protein product [Homo sapiens]
4615	2886	1933	3055	21.2129096362035	43.1169311110433	1.02331197704755	Up	6.93384e-136	3.90657845350318e-134	MYD88	4	GO:0031090//organelle membrane;GO:0044425//membrane part;GO:0044444//cytoplasmic part	GO:0004872//receptor activity;GO:0019904//protein domain specific binding;GO:0032813//tumor necrosis factor receptor superfamily binding	GO:0001819//positive regulation of cytokine production;GO:0002224//toll-like receptor signaling pathway;GO:0002237//response to molecule of bacterial origin;GO:0006357//regulation of transcription from RNA polymerase II promoter;GO:0007169//transmembrane receptor protein tyrosine kinase signaling pathway;GO:0007249//I-kappaB kinase/NF-kappaB cascade;GO:0009612//response to mechanical stimulus;GO:…	gi|194383896|dbj|BAG59306.1|/6.41702e-154/unnamed protein product [Homo sapiens]//gi|289546500|ref|NP_001166037.1|/1.01693e-62/myeloid differentiation primary response protein MyD88 isoform 5 [Homo sapiens] //gi|289546503|ref|NP_001166038.1|/1.00208e-146/myeloid differentiation primary response protein MyD88 isoform 1 [Homo sapiens]//gi|289546581|ref|NP_001166039.1|/7.46128e-128/myeloid different…
1397	2000	2080	3274	32.9380628548819	66.6778570331433	1.01745202799839	Up	4.03406e-144	2.41103227905405e-142	CRIP2	1	GO:0044421//extracellular region part	GO:0046914//transition metal ion binding	GO:0008283//cell proliferation;GO:0048534	gi|383415905|gb|AFH31166.1|/6.92532e-58/cysteine-rich protein 2 [Macaca mulatta]//gi|399498490|ref|NP_001257766.1|/2.28653e-158/cysteine-rich protein 2 isoform 2 [Homo sapiens] //gi|399498490|ref|NP_001257766.1|/3.73075e-118/cysteine-rich protein 2 isoform 2 [Homo sapiens] //gi|399498490|ref|NP_001257766.1|/6.0848e-120/cysteine-rich protein 2 isoform 2 [Homo sapiens] //gi|399498492|ref|NP_0012577…
374286	2780	139	218	1.58356071417701	3.1940716333232	1.01222448660611	Up	5.1662e-11	2.83836162111801e-10	CDRT1	3	-	-	-	gi|157694487|ref|NP_006373.2|/0/CMT1A duplicated region transcript 1 protein [Homo sapiens]
9111	1501	840	1316	17.7240639561451	35.7115048349427	1.01067949062181	Up	1.966832e-58	5.10943097092511e-57	NMI	2	GO:0031981//nuclear lumen	GO:0000989//transcription factor binding transcription factor activity;GO:0005488//binding	GO:0006351//transcription, DNA-dependent;GO:0006952//defense response;GO:0007243//intracellular protein kinase cascade	gi|188219599|ref|NP_004679.2|/2.63801e-171/N-myc-interactor [Homo sapiens]
9429	4445	195	305	1.38940085158388	2.79486624275781	1.00831635325333	Up	9.76806e-15	6.79271813915094e-14	ABCG2	1	GO:0031224//intrinsic to membrane	GO:0032559;GO:0042626//ATPase activity, coupled to transmembrane movement of substances;GO:0042802//identical protein binding;GO:0051184	GO:0006082//organic acid metabolic process;GO:0006875//cellular metal ion homeostasis;GO:0009207;GO:0042221//response to chemical stimulus;GO:0051181//cofactor transport	gi|383792176|ref|NP_001244315.1|/0/ATP-binding cassette sub-family G member 2 isoform 2 [Homo sapiens]//gi|62526033|ref|NP_004818.2|/0/ATP-binding cassette sub-family G member 2 isoform 1 [Homo sapiens]
80714	1747	89	139	1.61347342371785	3.2408195452985	1.0061888763098	Up	1.826114e-07	7.48512112465246e-07	PBX4	2	GO:0001739//sex chromatin	GO:0001071//nucleic acid binding transcription factor activity;GO:0003677//DNA binding	GO:0006351//transcription, DNA-dependent	gi|15149472|ref|NP_079521.1|/1.43911e-171/pre-B-cell leukemia transcription factor 4 [Homo sapiens]//gi|15149472|ref|NP_079521.1|/2.55938e-106/pre-B-cell leukemia transcription factor 4 [Homo sapiens]
10998	2378	221	345	2.94337189094298	5.90935660897733	1.00553122682679	Up	2.11176e-16	1.62219479635258e-15	SLC27A5	2	GO:0016323//basolateral plasma membrane;GO:0031090//organelle membrane;GO:0031224//intrinsic to membrane;GO:0032991//macromolecular complex;GO:0042598;GO:0043231//intracellular membrane-bounded organelle	GO:0005319//lipid transporter activity;GO:0005515//protein binding;GO:0015645//fatty acid ligase activity;GO:0016878//acid-thiol ligase activity;GO:0032559	GO:0006631//fatty acid metabolic process;GO:0006641//triglyceride metabolic process;GO:0006694//steroid biosynthetic process;GO:0015909//long-chain fatty acid transport;GO:0044249//cellular biosynthetic process	gi|13325057|ref|NP_036386.1|/0/bile acyl-CoA synthetase precursor [Homo sapiens]
10551	996	944	1473	30.0176970719498	60.2388070362207	1.0048799002267	Up	1.394482e-64	3.95349055480769e-63	AGR2	3	GO:0043231//intracellular membrane-bounded organelle	GO:0005488//binding	GO:0007589//body fluid secretion	gi|68012756|gb|AAY84773.1|/9.70752e-91/AGR2 [Homo sapiens]
79090	822	580	905	22.3470855042012	44.8445546902713	1.00484612650832	Up	2.31268e-40	4.145250443769e-39	TRAPPC6A	1	GO:0043231//intracellular membrane-bounded organelle	GO:0005506//iron ion binding;GO:0009975//cyclase activity	GO:0006810//transport	gi|13129120|ref|NP_077013.1|/6.90916e-94/trafficking protein particle complex subunit 6A [Homo sapiens]
79444	1322	318	496	7.61834050088185	15.2821048652886	1.00429458965521	Up	7.4826e-23	7.75481409490334e-22	BIRC7	2	GO:0043231//intracellular membrane-bounded organelle	GO:0005515//protein binding;GO:0046914//transition metal ion binding	GO:0000187//activation of MAPK activity;GO:0000737//DNA catabolic process, endonucleolytic;GO:0043066//negative regulation of apoptotic process	gi|11545910|ref|NP_071444.1|/4.55778e-150/baculoviral IAP repeat-containing protein 7 isoform beta [Homo sapiens]//gi|21536421|ref|NP_647478.1|/5.47706e-162/baculoviral IAP repeat-containing protein 7 isoform alpha [Homo sapiens]
100289230	1876	52	81	0.877880140055488	1.75867317343098	1.00239151929622	Up	7.24226e-05	0.000222203991779396	LOC100289230	1	-	-	-	gi|332821691|ref|XP_003310813.1|/1.17511e-25/PREDICTED: hypothetical protein LOC100609280 [Pan troglodytes]
146713	2696	151	235	1.77386993947128	3.55042978733368	1.00109344179261	Up	1.428158e-11	8.12396886752412e-11	RBFOX3	1	GO:0043231//intracellular membrane-bounded organelle;GO:0044297//cell body	GO:0003676//nucleic acid binding	GO:0006396//RNA processing	gi|119609970|gb|EAW89564.1|/1.57796e-146/hCG1776007, isoform CRA_b [Homo sapiens]
346157	1596	26	0	0.515947099857173	0.001	-9.01107934324094	Down	3.59584e-07	1.4311362303712e-06	ZNF391	1	GO:0043231//intracellular membrane-bounded organelle	GO:0003676//nucleic acid binding;GO:0046914//transition metal ion binding	-	gi|119623502|gb|EAX03097.1|/0/hCG1642085, isoform CRA_b [Homo sapiens]
54210	2102	23	0	0.346545161047301	0.001	-8.43689956341703	Down	2.01962e-06	7.42345676708913e-06	TREM1	1	GO:0031224//intrinsic to membrane	GO:0004871//signal transducer activity	GO:0006955//immune response;GO:0007165//signal transduction;GO:0007599//hemostasis	gi|336088660|ref|NP_001229519.1|/2.17801e-74/triggering receptor expressed on myeloid cells 1 isoform 3 precursor [Homo sapiens] //gi|336088680|ref|NP_001229518.1|/4.21947e-120/triggering receptor expressed on myeloid cells 1 isoform 2 precursor [Homo sapiens]//gi|8924262|ref|NP_061113.1|/6.6388e-123/triggering receptor expressed on myeloid cells 1 isoform 1 precursor [Homo sapiens]
1187	2556	16	0	0.198254862494775	0.001	-7.6312124403752	Down	0.0001132488	0.00033888439120433	CLCNKA	1	GO:0034702//ion channel complex	GO:0005254//chloride channel activity	GO:0003008;GO:0006810//transport	gi|112382220|ref|NP_004061.3|/0/chloride channel protein ClC-Ka isoform 1 [Homo sapiens]//gi|112382222|ref|NP_001036169.1|/0/chloride channel protein ClC-Ka isoform 2 [Homo sapiens]//gi|380420340|ref|NP_001244068.1|/0/chloride channel protein ClC-Ka isoform 3 [Homo sapiens]
284418	3209	18	0	0.177650937084364	0.001	-7.4729014884827	Down	3.58416e-05	0.000114309310546241	FAM71E2	1	-	-	-	gi|223972704|ref|NP_001138874.1|/0/protein FAM71E2 [Homo sapiens]
100131897	3548	15	0	0.133897467376861	0.001	-7.06498486262964	Down	0.000201306	0.000581722385821627	FAM196B	1	-	-	-	gi|193788653|ref|NP_001123363.1|/0/protein FAM196B [Homo sapiens]
27127	4266	16	0	0.118785613815435	0.001	-6.89221631098163	Down	0.0001132488	0.000338827079452055	SMC1B	3	GO:0008278//cohesin complex;GO:0031981//nuclear lumen	GO:0032559	GO:0006996//organelle organization;GO:0022403	gi|71565160|ref|NP_683515.3|/0/structural maintenance of chromosomes protein 1B [Homo sapiens]
2246	4162	14	0	0.106534598743288	0.001	-6.73517823364447	Down	0.000357832	0.000997071335958419	FGF1	2	GO:0031012//extracellular matrix;GO:0031981//nuclear lumen;GO:0044444//cytoplasmic part	GO:0005539//glycosaminoglycan binding;GO:0070851//growth factor receptor binding	GO:0001932//regulation of protein phosphorylation;GO:0003156//regulation of organ formation;GO:0007169//transmembrane receptor protein tyrosine kinase signaling pathway;GO:0007243//intracellular protein kinase cascade;GO:0008284//positive regulation of cell proliferation;GO:0009408//response to heat;GO:0010893//positive regulation of steroid biosynthetic process;GO:0016477//cell migration;GO:0030…	gi|197098138|ref|NP_001127073.1|/1.03169e-91/fibroblast growth factor 1 [Pongo abelii] //gi|197098138|ref|NP_001127073.1|/1.61907e-91/fibroblast growth factor 1 [Pongo abelii] //gi|197098138|ref|NP_001127073.1|/2.51791e-89/fibroblast growth factor 1 [Pongo abelii] //gi|197098138|ref|NP_001127073.1|/2.69264e-91/fibroblast growth factor 1 [Pongo abelii] //gi|197098138|ref|NP_001127073.1|/2.6989e-86…
3938	6274	18	0	0.0908641786904248	0.001	-6.5056397489209	Down	3.58416e-05	0.000114329921673278	LCT	2	GO:0005626//insoluble fraction;GO:0016021//integral to membrane;GO:0042995//cell projection;GO:0044459//plasma membrane part	GO:0004553//hydrolase activity, hydrolyzing O-glycosyl compounds;GO:0043167//ion binding	GO:0006950//response to stress;GO:0007586//digestion;GO:0010038//response to metal ion;GO:0031667//response to nutrient levels;GO:0034285;GO:0044238//primary metabolic process;GO:0048545//response to steroid hormone stimulus	gi|32481206|ref|NP_002290.2|/0/lactase-phlorizin hydrolase preproprotein [Homo sapiens]
4094	6887	18	0	0.082776514752973	0.001	-6.3711496010727	Down	3.58416e-05	0.000114350540234445	MAF	4	GO:0043231//intracellular membrane-bounded organelle;GO:0044427//chromosomal part	GO:0001071//nucleic acid binding transcription factor activity;GO:0042802//identical protein binding;GO:0043566//structure-specific DNA binding;GO:0046983//protein dimerization activity	GO:0002062//chondrocyte differentiation;GO:0006357//regulation of transcription from RNA polymerase II promoter;GO:0043010//camera-type eye development	gi|119615981|gb|EAW95575.1|/1.38407e-78/hCG1640307, isoform CRA_b [Homo sapiens]//gi|380799885|gb|AFE71818.1|/1.8153e-59/transcription factor Maf isoform b, partial [Macaca mulatta]
3624	2175	147	2	2.14053724123238	0.0374544728066583	-5.83669111028368	Down	4.62102e-34	6.95748636765957e-33	INHBA	2	GO:0043511;GO:0048180	GO:0005102//receptor binding;GO:0046983//protein dimerization activity;GO:0060089	GO:0001553//luteinization;GO:0001704//formation of primary germ layer;GO:0002762//negative regulation of myeloid leukocyte differentiation;GO:0006357//regulation of transcription from RNA polymerase II promoter;GO:0006950//response to stress;GO:0008283//cell proliferation;GO:0008544//epidermis development;GO:0009887//organ morphogenesis;GO:0012502//induction of programmed cell death;GO:0016049//c…	gi|4504699|ref|NP_002183.1|/0/inhibin beta A chain precursor [Homo sapiens]
128102	8697	15	0	0.0546243778605386	0.001	-5.77147303814816	Down	0.000201306	0.000581817422970103	HSD3BP4	1	GO:0005740//mitochondrial envelope;GO:0005789//endoplasmic reticulum membrane;GO:0019866//organelle inner membrane;GO:0031224//intrinsic to membrane;GO:0042598	GO:0016863//intramolecular oxidoreductase activity, transposing C=C bonds;GO:0033764//steroid dehydrogenase activity, acting on the CH-OH group of donors, NAD or NADP as acceptor	GO:0006700//C21-steroid hormone biosynthetic process	gi|19979635|gb|AAM08704.1|/3.46753e-148/3-beta-hydroxysteroid dehydrogenase [Homo sapiens]
4319	1777	58	4	1.03372562095967	0.0916865260039187	-3.49499976057488	Down	8.67102e-11	4.69540908539945e-10	MMP10	2	GO:0031012//extracellular matrix;GO:0032991//macromolecular complex;GO:0043005//neuron projection;GO:0043231//intracellular membrane-bounded organelle	GO:0004175//endopeptidase activity;GO:0005515//protein binding;GO:0046914//transition metal ion binding	GO:0001101//response to acid;GO:0002237//response to molecule of bacterial origin;GO:0009611//response to wounding;GO:0019538//protein metabolic process;GO:0022414//reproductive process;GO:0031668//cellular response to extracellular stimulus;GO:0032963//collagen metabolic process;GO:0034097//response to cytokine stimulus;GO:0043627//response to estrogen stimulus	gi|4505205|ref|NP_002416.1|/0/stromelysin-2 preproprotein [Homo sapiens]
4884	5437	6311	525	36.7623750861546	3.93308130734807	-3.22449806094675	Down	0	0	NPTX1	3	GO:0016023//cytoplasmic membrane-bounded vesicle	GO:0043169//cation binding	GO:0007267//cell-cell signaling;GO:0007409//axonogenesis;GO:0051234//establishment of localization	gi|55770878|ref|NP_002513.2|/0/neuronal pentraxin-1 precursor [Homo sapiens]
344558	5608	44	4	0.248490268986407	0.0290525957041661	-3.09645038408461	Down	9.96556e-08	4.18965594011407e-07	SH3RF3	1	-	GO:0046914//transition metal ion binding	-	gi|150010572|ref|NP_001092759.1|/0/SH3 domain-containing RING finger protein 3 precursor [Homo sapiens]
4312	2081	62	6	0.943592160297692	0.117438940443751	-3.00625257511303	Down	3.47348e-10	1.79414115854015e-09	MMP1	1	GO:0031012//extracellular matrix	GO:0004175//endopeptidase activity;GO:0046914//transition metal ion binding	GO:0002376//immune system process;GO:0007599//hemostasis;GO:0019538//protein metabolic process;GO:0032963//collagen metabolic process;GO:0051704	gi|4505215|ref|NP_002412.1|/0/interstitial collagenase isoform 1 preproprotein [Homo sapiens]//gi|54697154|gb|AAV38949.1|/0/matrix metalloproteinase 1 (interstitial collagenase) [Homo sapiens]
283554	3908	40	4	0.324168006996318	0.0416906235181585	-2.95894686033467	Down	7.07528e-07	2.72342860052219e-06	GPR137C	1	GO:0031224//intrinsic to membrane	-	-	gi|153792393|ref|NP_001093122.1|/0/integral membrane protein GPR137C [Homo sapiens]
163782	5477	50	5	0.289129215661313	0.0371843519967508	-2.95894686033467	Down	2.52476e-08	1.11971745199298e-07	KANK4	4	-	-	-	gi|156104862|ref|NP_859063.3|/0/KN motif and ankyrin repeat domain-containing protein 4 [Homo sapiens]
114299	9500	39	4	0.130018669164007	0.0171502059693646	-2.92242098430955	Down	1.149488e-06	4.32488137133135e-06	PALM2	5	GO:0016020//membrane	-	GO:0065008	gi|119579457|gb|EAW59053.1|/0/hCG28765, isoform CRA_c [Homo sapiens]//gi|82617626|ref|NP_001032370.1|/0/paralemmin-2 isoform b [Homo sapiens]
388630	7029	56	6	0.252324370447895	0.0347688768051565	-2.85941118678376	Down	6.2948e-09	2.94139743264659e-08	TRABD2B	1	GO:0031224//intrinsic to membrane	-	-	gi|303228327|ref|NP_001181915.1|/0/UPF0632 protein A precursor [Homo sapiens]
54106	3922	35	4	0.282634497685852	0.0415418043623058	-2.76630178239228	Down	7.83738e-06	2.69906734631108e-05	TLR9	3	GO:0000323//lytic vacuole;GO:0031090//organelle membrane;GO:0031224//intrinsic to membrane;GO:0044459//plasma membrane part;GO:0045335//phagocytic vesicle	GO:0003723//RNA binding;GO:0004872//receptor activity;GO:0005126//cytokine receptor binding	GO:0001818//negative regulation of cytokine production;GO:0002224//toll-like receptor signaling pathway;GO:0007169//transmembrane receptor protein tyrosine kinase signaling pathway;GO:0007249//I-kappaB kinase/NF-kappaB cascade;GO:0009607//response to biotic stimulus;GO:0010669//epithelial structure maintenance;GO:0032481//positive regulation of type I interferon production;GO:0042108//positive re…	gi|8394456|ref|NP_059138.1|/0/toll-like receptor 9 precursor [Homo sapiens]
4239	1978	26	3	0.416305142250782	0.0617771574983431	-2.75249598286725	Down	0.0001405896	0.000415289800233762	MFAP4	1	GO:0043205//fibril	GO:0005515//protein binding	GO:0009987//cellular process;GO:0023052//signaling	gi|194385908|dbj|BAG65329.1|/3.06456e-151/unnamed protein product [Homo sapiens]//gi|194385908|dbj|BAG65329.1|/3.17429e-162/unnamed protein product [Homo sapiens]
221416	3638	39	5	0.339520988746034	0.0559809499412326	-2.6004928894222	Down	4.68516e-06	1.65538577112043e-05	C6orf223	1	-	-	-	gi|55769539|ref|NP_694978.2|/1.4486e-72/uncharacterized protein C6orf223 isoform 1 [Homo sapiens]//gi|55769539|ref|NP_694978.2|/9.65861e-78/uncharacterized protein C6orf223 isoform 1 [Homo sapiens]
4858	1885	30	4	0.504051155706211	0.086433398784596	-2.54390936105583	Down	8.15456e-05	0.000248385538842975	NOVA2	2	-	GO:0003676//nucleic acid binding	-	gi|395854336|ref|XP_003799652.1|/3.56628e-131/PREDICTED: RNA-binding protein Nova-2, partial [Otolemur garnettii]
5798	3801	52	7	0.433281542421493	0.0750124110078101	-2.5301035615308	Down	1.622674e-07	6.68219872765363e-07	PTPRN	1	GO:0005626//insoluble fraction;GO:0016021//integral to membrane	GO:0004725//protein tyrosine phosphatase activity;GO:0004871//signal transducer activity;GO:0019899//enzyme binding	GO:0006464//cellular protein modification process;GO:0006979//response to oxidative stress;GO:0007166//cell surface receptor signaling pathway;GO:0009746;GO:0043434//response to peptide hormone stimulus;GO:0048545//response to steroid hormone stimulus	gi|315113878|ref|NP_001186692.1|/0/receptor-type tyrosine-protein phosphatase-like N isoform 2 precursor [Homo sapiens]//gi|4506321|ref|NP_002837.1|/0/receptor-type tyrosine-protein phosphatase-like N isoform 1 precursor [Homo sapiens]
654	3105	1147	155	11.6994791572369	2.03330743074793	-2.5245440361889	Down	8.2823e-138	4.74181777669903e-136	BMP6	4	GO:0031982//vesicle;GO:0044421//extracellular region part;GO:0044424//intracellular part	GO:0046983//protein dimerization activity;GO:0070696//transmembrane receptor protein serine/threonine kinase binding	GO:0001934//positive regulation of protein phosphorylation;GO:0002376//immune system process;GO:0006357//regulation of transcription from RNA polymerase II promoter;GO:0006952//defense response;GO:0007178//transmembrane receptor protein serine/threonine kinase signaling pathway;GO:0007423//sensory organ development;GO:0030282//bone mineralization;GO:0031960//response to corticosteroid stimulus;GO…	gi|4502425|ref|NP_001709.1|/0/bone morphogenetic protein 6 preproprotein [Homo sapiens]
7482	2515	28	4	0.352601988047367	0.064782090142729	-2.44437368750492	Down	0.000203678	0.000588192539666993	WNT2B	2	GO:0016020//membrane;GO:0031012//extracellular matrix	GO:0001664//G-protein coupled receptor binding;GO:0060089	GO:0000122//negative regulation of transcription from RNA polymerase II promoter;GO:0001658//branching involved in ureteric bud morphogenesis;GO:0001759//organ induction;GO:0008283//cell proliferation;GO:0008406//gonad development;GO:0009798//axis specification;GO:0030177//positive regulation of Wnt receptor signaling pathway;GO:0035567//non-canonical Wnt receptor signaling pathway;GO:0043010//ca…	gi|13518017|ref|NP_004176.2|/0/protein Wnt-2b isoform WNT-2B1 [Homo sapiens]//gi|387542146|gb|AFJ71700.1|/0/protein Wnt-2b isoform WNT-2B2 [Macaca mulatta]
145501	3006	56	8	0.590015968023372	0.108401168801706	-2.44437368750491	Down	9.4107e-08	3.96109192719486e-07	ISM2	3	-	-	-	gi|193786972|dbj|BAG51795.1|/3.95831e-142/unnamed protein product [Homo sapiens]//gi|40805858|ref|NP_954993.1|/0/isthmin-2 isoform 1 precursor [Homo sapiens]
152078	1537	27	4	0.556358351109686	0.106003224924505	-2.39190626761077	Down	0.000320182	0.000899529897093854	C3orf55	1	-	-	-	gi|118835472|gb|AAI26190.1|/1.84415e-64/C3orf55 protein [Homo sapiens]//gi|118835472|gb|AAI26190.1|/6.56261e-42/C3orf55 protein [Homo sapiens]//gi|119599107|gb|EAW78701.1|/5.4114e-73/hCG1811420, isoform CRA_a [Homo sapiens]//gi|119599108|gb|EAW78702.1|/2.6155e-73/hCG1811420, isoform CRA_b [Homo sapiens]//gi|119599109|gb|EAW78703.1|/4.62891e-46/hCG1811420, isoform CRA_c [Homo sapiens]
6422	4482	6624	996	46.807256451176	9.05149759494241	-2.37050379087856	Down	0	0	SFRP1	4	GO:0016020//membrane;GO:0031012//extracellular matrix;GO:0044444//cytoplasmic part	GO:0001664//G-protein coupled receptor binding;GO:0004175//endopeptidase activity;GO:0004888//transmembrane signaling receptor activity;GO:0005539//glycosaminoglycan binding;GO:0019904//protein domain specific binding;GO:0061135	GO:0000737//DNA catabolic process, endonucleolytic;GO:0001503//ossification;GO:0001666//response to hypoxia;GO:0001756//somitogenesis;GO:0001933//negative regulation of protein phosphorylation;GO:0001954//positive regulation of cell-matrix adhesion;GO:0002762//negative regulation of myeloid leukocyte differentiation;GO:0003402//planar cell polarity pathway involved in axis elongation;GO:0006357//…	gi|56117838|ref|NP_003003.3|/1.33157e-140/secreted frizzled-related protein 1 precursor [Homo sapiens]
7700	1643	53	8	1.02165207366259	0.198328614374879	-2.36493922001051	Down	3.57982e-07	1.42604358522855e-06	ZNF141	2	GO:0043231//intracellular membrane-bounded organelle	GO:0003676//nucleic acid binding;GO:0046914//transition metal ion binding	GO:0006351//transcription, DNA-dependent;GO:0032502//developmental process	gi|4507993|ref|NP_003432.1|/0/zinc finger protein 141 [Homo sapiens]
84648	617	39	6	2.00190819620433	0.396094708368631	-2.3374584835884	Down	1.628472e-05	5.39601014272336e-05	LCE3D	1	-	-	-	-
284047	8713	227	35	0.825130912700981	0.163618830621305	-2.33428423579326	Down	3.33416e-26	3.92968851165889e-25	CCDC144B	1	-	-	-	gi|121942840|sp|Q3MJ40.1|C144B_HUMAN/0/RecName: Full=Coiled-coil domain-containing protein 144B
79827	2645	1010	156	12.0937339986297	2.4023256376747	-2.33175612422421	Down	4.82204e-111	2.26879546914894e-109	CLMP	2	GO:0005626//insoluble fraction;GO:0030054//cell junction	-	-	gi|13376115|ref|NP_079045.1|/8.71847e-158/CXADR-like membrane protein precursor [Homo sapiens]
100507127	3087	523	82	5.36574184330793	1.0819574384625	-2.31013389707618	Down	1.087184e-57	2.7594508097561e-56	LOC100507127	1	-	-	-	gi|119606794|gb|EAW86388.1|/1.30412e-67/hCG2038246 [Homo sapiens]
79605	3373	38	6	0.356805853179523	0.0724549170066544	-2.29998377816974	Down	2.5304e-05	8.21080454878943e-05	PGBD5	1	-	-	-	gi|385198065|ref|NP_001245240.1|/0/piggyBac transposable element-derived protein 5 [Homo sapiens]
10397	3520	6160	982	55.4246249961955	11.3632295091053	-2.28615418671488	Down	0	0	NDRG1	1	GO:0005856//cytoskeleton;GO:0016020//membrane;GO:0043231//intracellular membrane-bounded organelle	GO:0005488//binding	GO:0002274;GO:0010035//response to inorganic substance	gi|37655183|ref|NP_006087.2|/0/protein NDRG1 isoform 1 [Homo sapiens]
6383	3485	62	10	0.563447714656958	0.11687730036511	-2.26928698094683	Down	7.22918e-08	3.07875357197882e-07	SDC2	3	GO:0016021//integral to membrane;GO:0044297//cell body	GO:0019904//protein domain specific binding	GO:0009611//response to wounding;GO:0014074//response to purine-containing compound;GO:0048812//neuron projection morphogenesis	gi|386787|gb|AAA52701.1|/2.74151e-146/heparan sulfate proteoglycan core protein, partial [Homo sapiens]
5593	3328	37	6	0.352113860724456	0.0734346259205064	-2.2615096303551	Down	3.91988e-05	0.000124477826386645	PRKG2	1	GO:0044444//cytoplasmic part	GO:0004690//cyclic nucleotide-dependent protein kinase activity;GO:0019002//GMP binding;GO:0032559	GO:0001775//cell activation;GO:0006464//cellular protein modification process;GO:0006796//phosphate-containing compound metabolic process;GO:0007599//hemostasis;GO:0023052//signaling	gi|5453978|ref|NP_006250.1|/0/cGMP-dependent protein kinase 2 [Homo sapiens]
3488	6333	60	10	0.300058875258553	0.0643166574723525	-2.22198126616847	Down	1.710444e-07	7.02401689972145e-07	IGFBP5	3	GO:0005615//extracellular space	GO:0005520//insulin-like growth factor binding	GO:0001503//ossification;GO:0006412//translation;GO:0008285//negative regulation of cell proliferation;GO:0009968//negative regulation of signal transduction;GO:0014909//smooth muscle cell migration;GO:0016049//cell growth;GO:0048589//developmental growth	gi|10834982|ref|NP_000590.1|/3.15025e-151/insulin-like growth factor-binding protein 5 precursor [Homo sapiens]
84176	2282	36	6	0.499633529451117	0.107094844462509	-2.22198126616846	Down	6.05294e-05	0.000187535134045534	MYH16	2	-	-	-	gi|10438291|dbj|BAB15219.1|/0/unnamed protein product [Homo sapiens]
5865	12844	2419	407	5.96486042914076	1.29070521995773	-2.20832883516098	Down	9.41324e-247	9.51597879085714e-245	RAB3B	3	GO:0016020//membrane;GO:0030136//clathrin-coated vesicle	GO:0017111//nucleoside-triphosphatase activity;GO:0032561//guanyl ribonucleotide binding	GO:0006479//protein methylation;GO:0006887//exocytosis;GO:0009207;GO:0035556//intracellular signal transduction	gi|19923750|ref|NP_002858.2|/1.84397e-121/ras-related protein Rab-3B [Homo sapiens]
3484	1660	2631	449	50.1969667349364	11.0171993316754	-2.18784266387205	Down	3.6168e-265	3.94967955555555e-263	IGFBP1	2	GO:0044421//extracellular region part	GO:0019838//growth factor binding	GO:0007169//transmembrane receptor protein tyrosine kinase signaling pathway;GO:0009888//tissue development;GO:0016049//cell growth;GO:0019318//hexose metabolic process;GO:0048017//inositol lipid-mediated signaling	gi|226201417|gb|ACO37638.1|/2.09942e-132/insulin-like growth factor binding protein 1 precursor [Homo sapiens]
6781	3897	1623	278	13.1902439779794	2.90567705703694	-2.18252497727177	Down	8.00874e-164	5.40773356259542e-162	STC1	2	GO:0044421//extracellular region part;GO:0044424//intracellular part;GO:0044459//plasma membrane part	GO:0005102//receptor binding	GO:0001666//response to hypoxia;GO:0003006//developmental process involved in reproduction;GO:0006875//cellular metal ion homeostasis;GO:0007154//cell communication;GO:0007165//signal transduction;GO:0007275//multicellular organismal development;GO:0030002//cellular anion homeostasis;GO:0033273//response to vitamin;GO:0051384//response to glucocorticoid stimulus;GO:0051591//response to cAMP	gi|4507265|ref|NP_003146.1|/4.49627e-137/stanniocalcin-1 precursor [Homo sapiens]
25992	6834	174	30	0.806378590186715	0.17880482518543	-2.17307166568752	Down	7.50066e-19	6.51099980667321e-18	SNED1	1	-	GO:0046872//metal ion binding	GO:0031589//cell-substrate adhesion	gi|122937283|ref|NP_001073906.1|/0/sushi, nidogen and EGF-like domain-containing protein 1 precursor [Homo sapiens]
84620	6871	353	61	1.62711958115117	0.361612005503084	-2.1698058011556	Down	1.11334e-36	1.81196853173873e-35	ST6GAL2	2	GO:0031228//intrinsic to Golgi membrane	GO:0008373//sialyltransferase activity	GO:0005975//carbohydrate metabolic process;GO:0006040//amino sugar metabolic process;GO:0006464//cellular protein modification process;GO:0032501//multicellular organismal process	gi|14017971|dbj|BAB47506.1|/0/KIAA1877 protein [Homo sapiens]//gi|215272347|ref|NP_001135824.1|/0/beta-galactoside alpha-2,6-sialyltransferase 2 isoform b [Homo sapiens]
768	1561	472	85	9.57643378720757	2.21793582963836	-2.11027087867145	Down	6.43792e-47	1.33520800375147e-45	CA9	2	GO:0005902//microvillus;GO:0031224//intrinsic to membrane;GO:0031981//nuclear lumen;GO:0044459//plasma membrane part	GO:0016836//hydro-lyase activity;GO:0046914//transition metal ion binding	GO:0006810//transport;GO:0006950//response to stress;GO:0044237//cellular metabolic process;GO:0048545//response to steroid hormone stimulus;GO:0048729//tissue morphogenesis	gi|169636420|ref|NP_001207.2|/0/carbonic anhydrase 9 precursor [Homo sapiens]
9201	8463	98	18	0.366746898237853	0.0866325540813347	-2.08180360812021	Down	1.094572e-10	5.86079698910412e-10	DCLK1	1	GO:0016021//integral to membrane	GO:0004672//protein kinase activity;GO:0004871//signal transducer activity;GO:0032559	GO:0006464//cellular protein modification process;GO:0006796//phosphate-containing compound metabolic process;GO:0007165//signal transduction;GO:0007420//brain development;GO:0016192//vesicle-mediated transport;GO:0016477//cell migration;GO:0021955//central nervous system neuron axonogenesis;GO:0048588//developmental cell growth;GO:0051707//response to other organism	gi|306518604|ref|NP_001182344.1|/0/serine/threonine-protein kinase DCLK1 isoform 2 [Homo sapiens] //gi|306518606|ref|NP_001182345.1|/0/serine/threonine-protein kinase DCLK1 isoform 3 [Homo sapiens]//gi|395745258|ref|XP_002824208.2|/1.11851e-08/PREDICTED: serine/threonine-protein kinase DCLK1 [Pongo abelii]//gi|40788228|dbj|BAA20824.2|/0/KIAA0369 [Homo sapiens]
6098	7368	74	14	0.318087657027956	0.0773947269925858	-2.03911720901866	Down	3.41858e-08	1.49958092685346e-07	ROS1	2	GO:0005626//insoluble fraction;GO:0005887//integral to plasma membrane	GO:0004713//protein tyrosine kinase activity;GO:0004871//signal transducer activity;GO:0032559	GO:0006464//cellular protein modification process;GO:0006817//phosphate ion transport;GO:0007167//enzyme linked receptor protein signaling pathway;GO:0010467//gene expression;GO:0048232//male gamete generation	gi|19924165|ref|NP_002935.2|/0/proto-oncogene tyrosine-protein kinase ROS precursor [Homo sapiens]
3589	2381	7288	1388	96.942381225721	23.7444997807687	-2.0295341566711	Down	0	0	IL11	3	GO:0005576//extracellular region;GO:0044424//intracellular part	GO:0005126//cytokine receptor binding	GO:0001934//positive regulation of protein phosphorylation;GO:0006357//regulation of transcription from RNA polymerase II promoter;GO:0008283//cell proliferation;GO:0010740//positive regulation of intracellular protein kinase cascade;GO:0030098//lymphocyte differentiation;GO:0030099//myeloid cell differentiation;GO:0046883//regulation of hormone secretion	gi|10834994|ref|NP_000632.1|/2.9669e-47/interleukin-11 isoform 1 precursor [Homo sapiens]//gi|10834994|ref|NP_000632.1|/9.70608e-60/interleukin-11 isoform 1 precursor [Homo sapiens]
100506334	2567	68	13	0.838972563802392	0.206276824816568	-2.02404188855656	Down	1.443582e-07	5.97529460973327e-07	LOC100506334	1	-	-	-	gi|119630205|gb|EAX09800.1|/2.43756e-56/hCG1815368 [Homo sapiens]
100381270	2940	303	58	3.26407412514038	0.803551317102031	-2.02221175379269	Down	3.84502e-29	5.03868509777778e-28	ZBED6	1	GO:0031981//nuclear lumen	GO:0003676//nucleic acid binding;GO:0005515//protein binding;GO:0043169//cation binding	GO:0006357//regulation of transcription from RNA polymerase II promoter	gi|291621630|ref|NP_001167579.1|/0/zinc finger BED domain-containing protein 6 [Homo sapiens]
55504	4523	125	24	0.875282287296603	0.216131271336233	-2.01784054938824	Down	8.18388e-13	5.06758911725586e-12	TNFRSF19	1	GO:0031224//intrinsic to membrane;GO:0043231//intracellular membrane-bounded organelle	GO:0005035//death receptor activity;GO:0005488//binding	GO:0000165//MAPK cascade;GO:0007249//I-kappaB kinase/NF-kappaB cascade;GO:0008544//epidermis development;GO:0012502//induction of programmed cell death;GO:0019221//cytokine-mediated signaling pathway	gi|23238202|ref|NP_061117.2|/0/tumor necrosis factor receptor superfamily member 19 isoform 1 precursor [Homo sapiens]//gi|23238204|ref|NP_683760.1|/0/tumor necrosis factor receptor superfamily member 19 isoform 2 precursor [Homo sapiens]
4052	6168	3523	698	18.0897678211596	4.60939590559568	-1.97252429873262	Down	0	0	LTBP1	1	GO:0031012//extracellular matrix	GO:0004675//transmembrane receptor protein serine/threonine kinase activity;GO:0005515//protein binding;GO:0046872//metal ion binding	GO:0030512//negative regulation of transforming growth factor beta receptor signaling pathway	gi|261337165|ref|NP_996826.2|/0/latent-transforming growth factor beta-binding protein 1 isoform LTBP-1L precursor [Homo sapiens]//gi|261337167|ref|NP_000618.3|/0/latent-transforming growth factor beta-binding protein 1 isoform LTBP-1S precursor [Homo sapiens]//gi|261337169|ref|NP_001159736.1|/0/latent-transforming growth factor beta-binding protein 1 isoform 4 precursor [Homo sapiens]//gi|261337…
283578	978	50	10	1.61918273433233	0.416479950687534	-1.95894686033468	Down	1.103254e-05	3.71977635105775e-05	TMED8	1	GO:0031224//intrinsic to membrane	-	GO:0051234//establishment of localization	gi|47106067|ref|NP_998766.1|/1.39386e-166/protein TMED8 [Homo sapiens]
10317	3409	80	16	0.74323764819103	0.191172727144574	-1.95894686033467	Down	2.19442e-08	9.77624885922941e-08	B3GALT5	1	GO:0012505//endomembrane system;GO:0031224//intrinsic to membrane;GO:0043231//intracellular membrane-bounded organelle	GO:0035250//UDP-galactosyltransferase activity	GO:0006464//cellular protein modification process	gi|119630033|gb|EAX09628.1|/0/UDP-Gal:betaGlcNAc beta 1,3-galactosyltransferase, polypeptide 5, isoform CRA_a [Homo sapiens]//gi|5174397|ref|NP_006048.1|/0/beta-1,3-galactosyltransferase 5 [Homo sapiens]
23704	2976	35	7	0.372477318522819	0.0958071822045316	-1.95894686033467	Down	0.000260944	0.000741226766859345	KCNE4	2	GO:0044459//plasma membrane part	GO:0005267//potassium channel activity	GO:0030001//metal ion transport;GO:0034220//ion transmembrane transport	gi|221039996|dbj|BAH11761.1|/1.85013e-95/unnamed protein product [Homo sapiens]
100862728	813	40	8	1.55823932514343	0.400804321547266	-1.95894686033467	Down	9.03378e-05	0.000273752315827338	UPK1A-AS1	1	GO:0031224//intrinsic to membrane;GO:0043231//intracellular membrane-bounded organelle;GO:0044459//plasma membrane part	GO:0042802//identical protein binding	GO:0006461//protein complex assembly;GO:0016192//vesicle-mediated transport;GO:0023052//signaling;GO:0030154//cell differentiation	gi|76827241|gb|AAI07098.1|/1.31933e-37/UPK1A protein [Homo sapiens]
168667	5031	849	171	5.34463544558253	1.38444193983466	-1.94878699411445	Down	3.68874e-75	1.2017955679558e-73	BMPER	4	GO:0044421//extracellular region part	GO:0005488//binding	GO:0001775//cell activation;GO:0001932//regulation of protein phosphorylation;GO:0001935//endothelial cell proliferation;GO:0030334//regulation of cell migration;GO:0030509//BMP signaling pathway;GO:0035295//tube development;GO:0043410//positive regulation of MAPK cascade	gi|37693519|ref|NP_597725.1|/0/BMP-binding endothelial regulator protein precursor [Homo sapiens]
494470	5276	74	15	0.444213392149731	0.115802897585029	-1.93958153546774	Down	9.16702e-08	3.86311936207718e-07	RNF165	2	-	GO:0046914//transition metal ion binding	-	gi|119621881|gb|EAX01476.1|/3.20013e-23/hCG2020752 [Homo sapiens]//gi|355755011|gb|EHH58878.1|/1.50981e-105/RING finger protein 165, partial [Macaca fascicularis]//gi|57165361|ref|NP_689683.2|/0/RING finger protein 165 isoform 1 [Homo sapiens]
3690	4894	4057	825	26.2546212399516	6.8663025789178	-1.93496604352041	Down	0	0	ITGB3	2	GO:0005887//integral to plasma membrane;GO:0009986//cell surface;GO:0030667//secretory granule membrane;GO:0043234//protein complex	GO:0004871//signal transducer activity;GO:0005172//vascular endothelial growth factor receptor binding	GO:0001525//angiogenesis;GO:0001775//cell activation;GO:0001934//positive regulation of protein phosphorylation;GO:0001935//endothelial cell proliferation;GO:0002376//immune system process;GO:0006869//lipid transport;GO:0006887//exocytosis;GO:0006935//chemotaxis;GO:0007166//cell surface receptor signaling pathway;GO:0007599//hemostasis;GO:0009611//response to wounding;GO:0009967//positive regulat…	gi|47078292|ref|NP_000203.2|/0/integrin beta-3 precursor [Homo sapiens]
22795	5063	894	183	5.59234951007012	1.47223153652678	-1.92544994834658	Down	7.76442e-78	2.59170479660377e-76	NID2	3	GO:0005578//proteinaceous extracellular matrix;GO:0044464//cell part	GO:0005515//protein binding;GO:0046872//metal ion binding	GO:0006464//cellular protein modification process;GO:0031589//cell-substrate adhesion	gi|144953895|ref|NP_031387.3|/0/nidogen-2 precursor [Homo sapiens]
5156	6574	39	8	0.187888250237005	0.0495670692756202	-1.92242098430956	Down	0.0001353174	0.000400652740317992	PDGFRA	4	GO:0016021//integral to membrane	GO:0005017//platelet-derived growth factor-activated receptor activity;GO:0019838//growth factor binding;GO:0019900//kinase binding;GO:0032559;GO:0042802//identical protein binding;GO:0070851//growth factor receptor binding	GO:0006275//regulation of DNA replication;GO:0006468//protein phosphorylation;GO:0007169//transmembrane receptor protein tyrosine kinase signaling pathway;GO:0008202//steroid metabolic process;GO:0008284//positive regulation of cell proliferation;GO:0008406//gonad development;GO:0009611//response to wounding;GO:0016477//cell migration;GO:0022008//neurogenesis;GO:0022602//ovulation cycle process;G…	gi|5453870|ref|NP_006197.1|/0/platelet-derived growth factor receptor alpha precursor [Homo sapiens]
93649	6950	482	100	2.19647845822538	0.586068189600588	-1.90605191190255	Down	3.4703e-42	6.45563378548896e-41	MYOCD	1	GO:0043231//intracellular membrane-bounded organelle	GO:0003712//transcription cofactor activity;GO:0019899//enzyme binding;GO:0042802//identical protein binding	GO:0001558//regulation of cell growth;GO:0006939//smooth muscle contraction;GO:0007507//heart development;GO:0008283//cell proliferation;GO:0016573//histone acetylation;GO:0048742//regulation of skeletal muscle fiber development	gi|226423889|ref|NP_001139784.1|/0/myocardin isoform 1 [Homo sapiens]//gi|23957692|ref|NP_705832.1|/0/myocardin isoform 2 [Homo sapiens]
5063	2754	72	15	0.82800560218406	0.221850431248589	-1.9000531712811	Down	2.02428e-07	8.2534080387186e-07	PAK3	1	-	GO:0004672//protein kinase activity;GO:0017016//Ras GTPase binding;GO:0019904//protein domain specific binding;GO:0032559;GO:0043169//cation binding	GO:0006464//cellular protein modification process;GO:0006796//phosphate-containing compound metabolic process;GO:0032501//multicellular organismal process;GO:0035556//intracellular signal transduction	gi|189491755|ref|NP_001121640.1|/0/serine/threonine-protein kinase PAK 3 isoform b [Homo sapiens]//gi|189491757|ref|NP_001121644.1|/0/serine/threonine-protein kinase PAK 3 isoform c [Homo sapiens]//gi|4505601|ref|NP_002569.1|/0/serine/threonine-protein kinase PAK 3 isoform a [Homo sapiens]//gi|57113963|ref|NP_001009039.1|/0/serine/threonine-protein kinase PAK 3 [Pan troglodytes]
51129	1967	9249	1946	148.920722373393	40.2968807518611	-1.88580444549453	Down	0	0	ANGPTL4	1	GO:0031012//extracellular matrix	GO:0005515//protein binding;GO:0030234//enzyme regulator activity	GO:0006629//lipid metabolic process;GO:0006915//apoptotic process;GO:0006950//response to stress;GO:0023052//signaling;GO:0045765//regulation of angiogenesis;GO:0048869//cellular developmental process;GO:0051004;GO:0051259//protein oligomerization;GO:0055088//lipid homeostasis	gi|37181670|gb|AAQ88642.1|/0/NL2 [Homo sapiens]
7046	6475	8213	1742	40.1723062410373	10.9582532272979	-1.87418343958629	Down	0	0	TGFBR1	2	GO:0031224//intrinsic to membrane;GO:0043235//receptor complex;GO:0044459//plasma membrane part	GO:0005024//transforming growth factor beta-activated receptor activity;GO:0005160//transforming growth factor beta receptor binding;GO:0019838//growth factor binding;GO:0019899//enzyme binding;GO:0032559;GO:0043169//cation binding;GO:0046332//SMAD binding;GO:0046983//protein dimerization activity	GO:0000165//MAPK cascade;GO:0001701//in utero embryonic development;GO:0001934//positive regulation of protein phosphorylation;GO:0003002//regionalization;GO:0006915//apoptotic process;GO:0006928//cellular component movement;GO:0007178//transmembrane receptor protein serine/threonine kinase signaling pathway;GO:0007276//gamete generation;GO:0008283//cell proliferation;GO:0010628//positive regulat…	gi|195963412|ref|NP_001124388.1|/0/TGF-beta receptor type-1 isoform 2 precursor [Homo sapiens]//gi|380800553|gb|AFE72152.1|/0/TGF-beta receptor type-1 isoform 1 precursor, partial [Macaca mulatta]
3708	10197	823	175	2.55618410859602	0.699034456802702	-1.87055627403661	Down	3.75622e-69	1.13786452089041e-67	ITPR1	1	GO:0005783//endoplasmic reticulum;GO:0008287//protein serine/threonine phosphatase complex;GO:0019866//organelle inner membrane;GO:0030667//secretory granule membrane;GO:0031224//intrinsic to membrane;GO:0031981//nuclear lumen;GO:0042598;GO:0044430//cytoskeletal part	GO:0004872//receptor activity;GO:0005217//intracellular ligand-gated ion channel activity;GO:0005261//cation channel activity;GO:0005543//phospholipid binding;GO:0046873//metal ion transmembrane transporter activity	GO:0001775//cell activation;GO:0006816//calcium ion transport;GO:0006950//response to stress;GO:0007169//transmembrane receptor protein tyrosine kinase signaling pathway;GO:0007275//multicellular organismal development;GO:0007599//hemostasis;GO:0010863//positive regulation of phospholipase C activity;GO:0015980//energy derivation by oxidation of organic compounds;GO:0030073//insulin secretion;GO:…	gi|269954690|ref|NP_001093422.2|/0/inositol 1,4,5-trisphosphate receptor type 1 isoform 1 [Homo sapiens]//gi|269954692|ref|NP_002213.5|/0/inositol 1,4,5-trisphosphate receptor type 1 isoform 2 [Homo sapiens]//gi|269954694|ref|NP_001161744.1|/0/inositol 1,4,5-trisphosphate receptor type 1 isoform 3 [Homo sapiens]
128710	1407	89	19	2.00336749910098	0.550037700332322	-1.86482468297012	Down	1.069168e-08	4.89003389038263e-08	C20orf94	1	-	GO:0005488//binding	-	gi|61102723|ref|NP_001009608.1|/0/UPF0492 protein C20orf94 [Homo sapiens]
340485	2852	139	30	1.54358302433804	0.428454479423992	-1.8490692425623	Down	9.94288e-13	6.12463405571031e-12	ACER2	2	GO:0031228//intrinsic to Golgi membrane	GO:0016811//hydrolase activity, acting on carbon-nitrogen (but not peptide) bonds, in linear amides	GO:0001952//regulation of cell-matrix adhesion;GO:0006670//sphingosine metabolic process;GO:0007162//negative regulation of cell adhesion;GO:0008283//cell proliferation;GO:0033189//response to vitamin A;GO:0033578//protein glycosylation in Golgi	gi|119579038|gb|EAW58634.1|/2.34223e-164/N-acylsphingosine amidohydrolase 3-like [Homo sapiens]
7038	8453	37	8	0.138629472198153	0.0385489073013045	-1.84647213107626	Down	0.000300222	0.000845871540372671	TG	4	GO:0043231//intracellular membrane-bounded organelle;GO:0044421//extracellular region part;GO:0044444//cytoplasmic part	GO:0005102//receptor binding	GO:0002237//response to molecule of bacterial origin;GO:0006575//cellular modified amino acid metabolic process;GO:0009058//biosynthetic process;GO:0009628//response to abiotic stimulus;GO:0015698//inorganic anion transport;GO:0016192//vesicle-mediated transport;GO:0042552//myelination	gi|55770862|ref|NP_003226.4|/0/thyroglobulin precursor [Homo sapiens]
3918	5623	3785	828	21.3187882025965	5.99784457384945	-1.82960939282108	Down	2.5309e-302	3.24450376086956e-300	LAMC2	2	GO:0005626//insoluble fraction;GO:0043256//laminin complex;GO:0044444//cytoplasmic part	GO:0005539//glycosaminoglycan binding	GO:0007044//cell-substrate junction assembly;GO:0009888//tissue development	gi|157419138|ref|NP_005553.2|/0/laminin subunit gamma-2 isoform a precursor [Homo sapiens]//gi|157419140|ref|NP_061486.2|/0/laminin subunit gamma-2 isoform b precursor [Homo sapiens]
7422	3677	5968	1309	51.404353234748	14.5003662178429	-1.82580120375731	Down	0	0	VEGFA	1	GO:0005578//proteinaceous extracellular matrix;GO:0031012//extracellular matrix;GO:0031091//platelet alpha granule;GO:0044421//extracellular region part	GO:0005172//vascular endothelial growth factor receptor binding;GO:0005539//glycosaminoglycan binding;GO:0042802//identical protein binding;GO:0046983//protein dimerization activity	GO:0001654//eye development;GO:0001666//response to hypoxia;GO:0001775//cell activation;GO:0001934//positive regulation of protein phosphorylation;GO:0001935//endothelial cell proliferation;GO:0002460//adaptive immune response based on somatic recombination of immune receptors built from immunoglobulin superfamily domains;GO:0002690//positive regulation of leukocyte chemotaxis;GO:0006357//regulat…	gi|194271211|gb|ACF37105.1|/1.93639e-131/vascular endothelial growth factor [Sus scrofa]//gi|194271211|gb|ACF37105.1|/2.46424e-142/vascular endothelial growth factor [Sus scrofa]//gi|194271211|gb|ACF37105.1|/3.746e-138/vascular endothelial growth factor [Sus scrofa]//gi|284172457|ref|NP_001165093.1|/5.08843e-105/vascular endothelial growth factor A isoform h [Homo sapiens]//gi|324120932|ref|NP_00…
1956	5616	4224	934	23.8210842474491	6.77411759108671	-1.8141341450961	Down	0	0	EGFR	3	GO:0005635//nuclear envelope;GO:0030128//clathrin coat of endocytic vesicle;GO:0031224//intrinsic to membrane;GO:0044421//extracellular region part;GO:0044459//plasma membrane part	GO:0003779//actin binding;GO:0004709//MAP kinase kinase kinase activity;GO:0004714//transmembrane receptor protein tyrosine kinase activity;GO:0019838//growth factor binding;GO:0019902//phosphatase binding;GO:0030234//enzyme regulator activity;GO:0032559;GO:0043566//structure-specific DNA binding;GO:0046983//protein dimerization activity	GO:0000165//MAPK cascade;GO:0001701//in utero embryonic development;GO:0001775//cell activation;GO:0002009//morphogenesis of an epithelium;GO:0006915//apoptotic process;GO:0006935//chemotaxis;GO:0007155//cell adhesion;GO:0007173//epidermal growth factor receptor signaling pathway;GO:0007346//regulation of mitotic cell cycle;GO:0007431//salivary gland development;GO:0008284//positive regulation of…	gi|29725609|ref|NP_005219.2|/0/epidermal growth factor receptor isoform a precursor [Homo sapiens]//gi|41327732|ref|NP_958439.1|/0/epidermal growth factor receptor isoform b precursor [Homo sapiens]//gi|41327734|ref|NP_958440.1|/0/epidermal growth factor receptor isoform c precursor [Homo sapiens]//gi|41327736|ref|NP_958441.1|/0/epidermal growth factor receptor isoform d precursor [Homo sapiens]
400221	1386	280	62	6.39822510778592	1.82205471067023	-1.8121054720054	Down	1.313904e-23	1.40110160723327e-22	FLJ22447	1	-	-	-	gi|332237264|ref|XP_003267824.1|/4.8139e-31/PREDICTED: hypothetical protein LOC100587412 [Nomascus leucogenys]
11245	2816	399	90	4.48750514883969	1.30179564131807	-1.78541060533998	Down	2.28094e-32	3.27533356655844e-31	GPR176	1	GO:0016021//integral to membrane	GO:0004888//transmembrane signaling receptor activity	GO:0007166//cell surface receptor signaling pathway;GO:0007267//cell-cell signaling	gi|6005772|ref|NP_009154.1|/0/probable G-protein coupled receptor 176 [Homo sapiens]
399694	4556	62	14	0.430995453375658	0.125163377629801	-1.78386015377658	Down	3.95776e-06	1.41305211220989e-05	SHC4	3	GO:0044459//plasma membrane part	GO:0005102//receptor binding	GO:0007165//signal transduction	gi|222446609|ref|NP_976224.3|/0/SHC-transforming protein 4 [Homo sapiens]
10085	2974	628	142	6.68780180567024	1.94482413018433	-1.78189239483426	Down	6.77068e-50	1.49538202097378e-48	EDIL3	3	-	GO:0005102//receptor binding;GO:0046872//metal ion binding	GO:0010810//regulation of cell-substrate adhesion;GO:0032501//multicellular organismal process	gi|31317224|ref|NP_005702.3|/0/EGF-like repeat and discoidin I-like domain-containing protein 3 precursor [Homo sapiens]
6447	1244	48	11	1.22204042251602	0.36016811169586	-1.76254964753116	Down	6.06084e-05	0.0001877470153038	SCG5	1	GO:0016023//cytoplasmic membrane-bounded vesicle	GO:0005515//protein binding;GO:0030234//enzyme regulator activity;GO:0032561//guanyl ribonucleotide binding	GO:0007186//G-protein coupled receptor signaling pathway;GO:0010646//regulation of cell communication;GO:0015031//protein transport	gi|221139785|ref|NP_001138229.1|/1.21797e-115/neuroendocrine protein 7B2 isoform 1 precursor [Homo sapiens]//gi|4506917|ref|NP_003011.1|/3.5311e-115/neuroendocrine protein 7B2 isoform 2 precursor [Homo sapiens]
90993	2702	134	31	1.57066717764411	0.467314550145991	-1.7489116455182	Down	1.586708e-11	8.99982405514588e-11	CREB3L1	2	GO:0031090//organelle membrane;GO:0031224//intrinsic to membrane;GO:0043231//intracellular membrane-bounded organelle	GO:0001071//nucleic acid binding transcription factor activity;GO:0003677//DNA binding;GO:0005515//protein binding	GO:0006351//transcription, DNA-dependent;GO:0006950//response to stress	gi|16418355|ref|NP_443086.1|/0/cyclic AMP-responsive element-binding protein 3-like protein 1 [Homo sapiens]
131544	10767	776	181	2.28261003845335	0.68472599527079	-1.73708572055123	Down	3.2745e-59	8.58210066666667e-58	CRYBG3	3	-	-	-	gi|390979647|ref|NP_705833.3|/0/beta/gamma crystallin domain-containing protein 3 [Homo sapiens]
26230	5916	111	26	0.594236779153646	0.179010347972999	-1.73099491365632	Down	1.181186e-09	5.82883166694561e-09	TIAM2	2	GO:0005626//insoluble fraction;GO:0030427//site of polarized growth;GO:0031252//cell leading edge;GO:0042995//cell projection;GO:0044444//cytoplasmic part	GO:0004871//signal transducer activity;GO:0005088//Ras guanyl-nucleotide exchange factor activity;GO:0008047//enzyme activator activity	GO:0006629//lipid metabolic process;GO:0006917//induction of apoptosis;GO:0007169//transmembrane receptor protein tyrosine kinase signaling pathway;GO:0007266//Rho protein signal transduction;GO:0009966//regulation of signal transduction	gi|119568077|gb|EAW47692.1|/0/T-cell lymphoma invasion and metastasis 2, isoform CRA_a [Homo sapiens]//gi|62088928|dbj|BAD92911.1|/0/T-cell lymphoma invasion and metastasis 2 variant [Homo sapiens]
7436	3646	1429	335	12.4131007161764	3.74249386296645	-1.729791681198	Down	6.04112e-107	2.76158795658915e-105	VLDLR	1	GO:0005626//insoluble fraction;GO:0012505//endomembrane system;GO:0031224//intrinsic to membrane;GO:0034385;GO:0043231//intracellular membrane-bounded organelle;GO:0044444//cytoplasmic part	GO:0005515//protein binding;GO:0030169//low-density lipoprotein particle binding;GO:0030228//lipoprotein particle receptor activity;GO:0030295//protein kinase activator activity;GO:0046872//metal ion binding	GO:0001666//response to hypoxia;GO:0007165//signal transduction;GO:0007611//learning or memory;GO:0009267//cellular response to starvation;GO:0010876//lipid localization;GO:0016125//sterol metabolic process;GO:0016192//vesicle-mediated transport;GO:0021543//pallium development;GO:0023052//signaling;GO:0032496//response to lipopolysaccharide;GO:0032868//response to insulin stimulus;GO:0033674//pos…	gi|65301164|ref|NP_001018066.1|/0/very low-density lipoprotein receptor isoform b precursor [Homo sapiens]//gi|65301167|ref|NP_003374.3|/0/very low-density lipoprotein receptor isoform a precursor [Homo sapiens]
5787	11332	169	40	0.472329263494379	0.143775994271941	-1.71597010684213	Down	7.4579e-14	4.92121256620664e-13	PTPRB	1	GO:0016021//integral to membrane	GO:0004725//protein tyrosine phosphatase activity;GO:0005488//binding	GO:0006464//cellular protein modification process;GO:0006796//phosphate-containing compound metabolic process;GO:0048646//anatomical structure formation involved in morphogenesis	gi|157952213|ref|NP_002828.3|/0/receptor-type tyrosine-protein phosphatase beta isoform b precursor [Homo sapiens]//gi|157952215|ref|NP_001103224.1|/0/receptor-type tyrosine-protein phosphatase beta isoform a [Homo sapiens]//gi|332800999|ref|NP_001193900.1|/0/receptor-type tyrosine-protein phosphatase beta isoform c precursor [Homo sapiens]//gi|332801001|ref|NP_001193901.1|/0/receptor-type tyrosi…
9645	3934	1582	377	12.7361110819931	3.90337205638531	-1.70613193665144	Down	5.41444e-116	2.62429748054794e-114	MICAL2	2	GO:0043232	GO:0016491//oxidoreductase activity;GO:0046914//transition metal ion binding	GO:0008152//metabolic process	gi|40788350|dbj|BAA34470.2|/0/KIAA0750 protein [Homo sapiens]
6932	3322	1831	437	17.4563495945702	5.35814871175625	-1.70394537174405	Down	1.014196e-133	5.60691919875e-132	TCF7	2	GO:0043231//intracellular membrane-bounded organelle	GO:0001071//nucleic acid binding transcription factor activity;GO:0043565//sequence-specific DNA binding	GO:0002376//immune system process;GO:0002681;GO:0006355//regulation of transcription, DNA-dependent;GO:0006915//apoptotic process;GO:0007166//cell surface receptor signaling pathway;GO:0007399//nervous system development;GO:0008283//cell proliferation;GO:0030217//T cell differentiation;GO:0035112//genitalia morphogenesis;GO:0048562//embryonic organ morphogenesis;GO:0051716//cellular response to s…	gi|119582683|gb|EAW62279.1|/0/transcription factor 7 (T-cell specific, HMG-box), isoform CRA_c [Homo sapiens]//gi|119582683|gb|EAW62279.1|/1.22887e-170/transcription factor 7 (T-cell specific, HMG-box), isoform CRA_c [Homo sapiens]//gi|119582683|gb|EAW62279.1|/1.46969e-170/transcription factor 7 (T-cell specific, HMG-box), isoform CRA_c [Homo sapiens]//gi|119582683|gb|EAW62279.1|/1.68753e-144/tra…
57574	4466	2119	509	15.0271614569686	4.64228733569539	-1.69466479174378	Down	2.69356e-153	1.7391156919708e-151	MARCH4	2	GO:0012505//endomembrane system;GO:0031224//intrinsic to membrane;GO:0044431//Golgi apparatus part	GO:0019787//small conjugating protein ligase activity;GO:0046914//transition metal ion binding	-	gi|7243179|dbj|BAA92637.1|/0/KIAA1399 protein [Homo sapiens]
64840	1867	6439	1557	109.229217338894	33.9685687728784	-1.68508647100643	Down	0	0	PORCN	1	GO:0031090//organelle membrane;GO:0031224//intrinsic to membrane;GO:0031227//intrinsic to endoplasmic reticulum membrane;GO:0043231//intracellular membrane-bounded organelle	GO:0005488//binding;GO:0016747//transferase activity, transferring acyl groups other than amino-acyl groups	GO:0007166//cell surface receptor signaling pathway;GO:0044260	gi|119571164|gb|EAW50779.1|/0/porcupine homolog (Drosophila), isoform CRA_c [Homo sapiens]//gi|119571166|gb|EAW50781.1|/0/porcupine homolog (Drosophila), isoform CRA_e [Homo sapiens]
387646	6454	62	15	0.304247797579718	0.0946662670682697	-1.68432448022567	Down	9.24596e-06	3.14982242172155e-05	LRRC37A6P	1	-	-	-	gi|297273313|ref|XP_001104557.2|/0/PREDICTED: leucine-rich repeat-containing protein 37A3-like [Macaca mulatta]
643314	6979	793	192	3.59869220903388	1.12057514286148	-1.68323332043013	Down	5.94436e-58	1.52187659565847e-56	KIAA0754	1	-	-	-	gi|149773456|ref|NP_055853.1|/0/uncharacterized protein KIAA0754 [Homo sapiens]
51458	1952	658	160	10.6760548148409	3.33866714567548	-1.67703444429519	Down	3.93584e-48	8.32882122488038e-47	RHCG	1	GO:0016021//integral to membrane;GO:0031982//vesicle;GO:0044459//plasma membrane part	GO:0008092//cytoskeletal protein binding;GO:0015101//organic cation transmembrane transporter activity	GO:0015696//ammonium transport;GO:0030154//cell differentiation;GO:0055067;GO:0071702	gi|7706683|ref|NP_057405.1|/0/ammonium transporter Rh type C [Homo sapiens]
8353	462	49	12	3.35906818158761	1.05796725135691	-1.66676610884136	Down	9.64966e-05	0.000291915415629275	HIST1H3E	2	GO:0000785//chromatin;GO:0031981//nuclear lumen	GO:0003676//nucleic acid binding	GO:0007599//hemostasis;GO:0022403;GO:0034728//nucleosome organization;GO:0050794//regulation of cellular process	gi|397465667|ref|XP_003804609.1|/2.2716e-70/PREDICTED: uncharacterized protein LOC100995896 [Pan paniscus]
222256	6500	53	13	0.258242208773482	0.0814634783544817	-1.66449950186942	Down	4.9803e-05	0.000156161799539171	CDHR3	4	GO:0031224//intrinsic to membrane	GO:0046872//metal ion binding	GO:0016337//cell-cell adhesion	gi|40255133|ref|NP_689963.2|/0/cadherin-related family member 3 precursor [Homo sapiens]
57476	2761	1864	459	21.3817976908798	6.77141190958115	-1.65885456668778	Down	3.84422e-131	2.07341756158537e-129	GRAMD1B	1	GO:0031224//intrinsic to membrane	-	-	gi|144227752|ref|NP_065767.1|/0/GRAM domain-containing protein 1B [Homo sapiens]
5922	2592	307	76	3.75118163003351	1.1942948215549	-1.65118609737391	Down	8.01276e-23	8.29454284142774e-22	RASA2	2	GO:0043227//membrane-bounded organelle;GO:0044444//cytoplasmic part	GO:0005083//small GTPase regulator activity;GO:0043169//cation binding	GO:0009966//regulation of signal transduction	gi|12545408|ref|NP_006497.2|/0/ras GTPase-activating protein 2 [Homo sapiens]
815	4918	105	26	0.676184932853137	0.215336563360769	-1.65082456497234	Down	1.061134e-08	4.85705603984476e-08	CAMK2A	2	GO:0030139//endocytic vesicle;GO:0031981//nuclear lumen;GO:0043005//neuron projection;GO:0043234//protein complex;GO:0044459//plasma membrane part	GO:0004674//protein serine/threonine kinase activity;GO:0005102//receptor binding;GO:0032559	GO:0006468//protein phosphorylation;GO:0007215//glutamate receptor signaling pathway;GO:0019221//cytokine-mediated signaling pathway;GO:0022402//cell cycle process;GO:0048167//regulation of synaptic plasticity;GO:0051091//positive regulation of sequence-specific DNA binding transcription factor activity;GO:0070838//divalent metal ion transport	gi|4589580|dbj|BAA76812.1|/0/KIAA0968 protein [Homo sapiens]
6565	5523	44	11	0.252314580567766	0.0811242315679249	-1.63701876544731	Down	0.0002712	0.000768754879025797	SLC15A2	1	GO:0005626//insoluble fraction;GO:0016021//integral to membrane	GO:0005488//binding;GO:0015198//oligopeptide transporter activity;GO:0015238//drug transmembrane transporter activity;GO:0015295//solute:hydrogen symporter activity	GO:0015833//peptide transport	gi|226371746|ref|NP_066568.3|/0/solute carrier family 15 member 2 isoform a [Homo sapiens]//gi|226371748|ref|NP_001139470.1|/0/solute carrier family 15 member 2 isoform b [Homo sapiens]
647135	1033	199	50	6.10123101880398	1.97152658166703	-1.62978719621623	Down	4.74846e-15	3.37369501445783e-14	SRGAP2B	1	GO:0019866//organelle inner membrane;GO:0044444//cytoplasmic part	GO:0005488//binding	GO:0006935//chemotaxis;GO:0009966//regulation of signal transduction;GO:0035556//intracellular signal transduction	gi|3413874|dbj|BAA32301.1|/2.98784e-98/KIAA0456 protein [Homo sapiens]
4330	7569	191	48	0.799207547649121	0.258306709011436	-1.62948509276191	Down	1.693572e-14	1.16353329133981e-13	MN1	2	-	-	-	gi|55956910|ref|NP_002421.3|/0/probable tumor suppressor protein MN1 [Homo sapiens]
2152	2393	254	64	3.36167506394452	1.08935700265082	-1.62570345221948	Down	9.3899e-19	8.11909681818182e-18	F3	1	GO:0009897//external side of plasma membrane;GO:0031224//intrinsic to membrane;GO:0044421//extracellular region part;GO:0044424//intracellular part	GO:0008289//lipid binding;GO:0019899//enzyme binding	GO:0001935//endothelial cell proliferation;GO:0002237//response to molecule of bacterial origin;GO:0002526//acute inflammatory response;GO:0007599//hemostasis;GO:0009628//response to abiotic stimulus;GO:0010740//positive regulation of intracellular protein kinase cascade;GO:0014909//smooth muscle cell migration;GO:0034614//cellular response to reactive oxygen species;GO:0043066//negative regulati…	gi|296010912|ref|NP_001171567.1|/1.46479e-110/tissue factor isoform 2 precursor [Homo sapiens]//gi|339504|gb|AAA61151.1|/8.05879e-147/tissue factor precursor [Homo sapiens]
57451	9645	63	16	0.206872628290621	0.0675694999311409	-1.61429868894723	Down	1.433722e-05	4.7766432960452e-05	ODZ2	1	GO:0016021//integral to membrane	-	GO:0023052//signaling	gi|170016091|ref|NP_001116151.1|/0/teneurin-2 [Homo sapiens]
1812	3373	137	35	1.28637899698933	0.422653682538817	-1.60576783146287	Down	1.370764e-10	7.28233811531532e-10	DRD1	3	GO:0005626//insoluble fraction;GO:0016021//integral to membrane;GO:0030425//dendrite;GO:0031090//organelle membrane;GO:0043231//intracellular membrane-bounded organelle;GO:0044297//cell body;GO:0044459//plasma membrane part	GO:0001588//dopamine neurotransmitter receptor activity, coupled via Gs	GO:0001508//regulation of action potential;GO:0002209//behavioral defense response;GO:0006605//protein targeting;GO:0006813//potassium ion transport;GO:0007189//adenylate cyclase-activating G-protein coupled receptor signaling pathway;GO:0007200//phospholipase C-activating G-protein coupled receptor signaling pathway;GO:0007618//mating;GO:0007631//feeding behavior;GO:0007632//visual behavior;GO:0…	gi|119581780|gb|EAW61376.1|/0/dopamine receptor D1, isoform CRA_a [Homo sapiens]
23043	5816	203	52	1.10544300198739	0.364176485078495	-1.60191496449139	Down	5.46552e-15	3.86607414314274e-14	TNIK	1	GO:0005768//endosome;GO:0031981//nuclear lumen;GO:0043232	GO:0004672//protein kinase activity;GO:0030695//GTPase regulator activity;GO:0032559	GO:0000186//activation of MAPKK activity;GO:0007166//cell surface receptor signaling pathway;GO:0010769//regulation of cell morphogenesis involved in differentiation;GO:0030036//actin cytoskeleton organization;GO:0048731	gi|119598893|gb|EAW78487.1|/0/TRAF2 and NCK interacting kinase, isoform CRA_e [Homo sapiens]//gi|119598897|gb|EAW78491.1|/0/TRAF2 and NCK interacting kinase, isoform CRA_i [Homo sapiens]//gi|20521083|dbj|BAA25477.2|/1.62232e-30/KIAA0551 protein [Homo sapiens]//gi|239735580|ref|NP_001155032.1|/0/TRAF2 and NCK-interacting protein kinase isoform 2 [Homo sapiens]//gi|239735588|ref|NP_001155036.1|/0/T…
57538	10936	156	40	0.45178396381056	0.148982220838482	-1.60049288942219	Down	7.99096e-12	4.62894804715128e-11	ALPK3	4	GO:0043231//intracellular membrane-bounded organelle	GO:0004672//protein kinase activity;GO:0032559	GO:0006464//cellular protein modification process;GO:0048513//organ development	gi|115511036|ref|NP_065829.3|/0/alpha-protein kinase 3 [Homo sapiens]
26040	9899	113	29	0.361536237401763	0.119327248827153	-1.59921673273492	Down	6.42306e-09	2.99737152360855e-08	SETBP1	1	GO:0043231//intracellular membrane-bounded organelle	GO:0003676//nucleic acid binding	-	gi|194294556|ref|NP_001123582.1|/8.64088e-119/SET-binding protein isoform b [Homo sapiens]//gi|20521051|dbj|BAA24826.2|/0/KIAA0437 [Homo sapiens]
23046	9955	642	166	2.04248313109321	0.679203285125262	-1.58840882122269	Down	1.21e-43	2.33946557377049e-42	KIF21B	1	GO:0015630//microtubule cytoskeleton	GO:0003774//motor activity;GO:0032559	GO:0007017//microtubule-based process	gi|355390323|ref|NP_001239029.1|/0/kinesin-like protein KIF21B isoform 1 [Homo sapiens]//gi|355390328|ref|NP_001239031.1|/0/kinesin-like protein KIF21B isoform 3 [Homo sapiens]//gi|355390331|ref|NP_001239032.1|/0/kinesin-like protein KIF21B isoform 4 [Homo sapiens]//gi|71891657|dbj|BAA32294.2|/0/KIAA0449 protein [Homo sapiens]
8671	7693	458	120	1.88553440034596	0.635357948949552	-1.56933195793574	Down	4.4264e-31	6.11299316159251e-30	SLC4A4	1	GO:0016021//integral to membrane;GO:0044459//plasma membrane part	GO:0005488//binding;GO:0015081//sodium ion transmembrane transporter activity;GO:0015301//anion:anion antiporter activity	GO:0015698//inorganic anion transport;GO:0030001//metal ion transport;GO:0055067	gi|148596928|ref|NP_001091954.1|/0/electrogenic sodium bicarbonate cotransporter 1 isoform 1 [Homo sapiens]//gi|197927160|ref|NP_001128214.1|/0/electrogenic sodium bicarbonate cotransporter 1 isoform 3 [Homo sapiens]//gi|4507025|ref|NP_003750.1|/0/electrogenic sodium bicarbonate cotransporter 1 isoform 2 [Homo sapiens]
283551	2686	80	21	0.943297521475511	0.318453657007468	-1.56662943755591	Down	1.598306e-06	5.93527108438287e-06	C14orf182	1	-	-	-	gi|61676098|ref|NP_001012724.1|/1.96832e-56/uncharacterized protein C14orf182 [Homo sapiens]
1305	3148	99	26	0.996013409806381	0.336412077067428	-1.56593566738583	Down	8.94844e-08	3.77640391316794e-07	COL13A1	3	-	GO:0005488//binding;GO:0005539//glycosaminoglycan binding	GO:0007155//cell adhesion;GO:0009987//cellular process;GO:0031589//cell-substrate adhesion;GO:0032502//developmental process	gi|194294532|ref|NP_001123575.1|/0/collagen alpha-1(XIII) chain isoform 1 [Homo sapiens]//gi|291045242|ref|NP_542991.3|/1.25825e-171/collagen alpha-1(XIII) chain isoform 5 [Homo sapiens]//gi|291045249|ref|NP_542995.3|/1.23781e-125/collagen alpha-1(XIII) chain isoform 19 [Homo sapiens]//gi|291045253|ref|NP_542992.3|/3.22463e-156/collagen alpha-1(XIII) chain isoform 15 [Homo sapiens]//gi|291045255|…
2558	2910	8822	2355	96.0149320994475	32.9633146949836	-1.54239746603938	Down	0	0	GABRA5	1	GO:0034702//ion channel complex;GO:0043005//neuron projection;GO:0043025//neuronal cell body;GO:0044459//plasma membrane part	GO:0005253//anion channel activity;GO:0015276//ligand-gated ion channel activity;GO:0016917//GABA receptor activity	GO:0002209//behavioral defense response;GO:0007186//G-protein coupled receptor signaling pathway;GO:0007267//cell-cell signaling;GO:0007417//central nervous system development;GO:0007612//learning;GO:0015698//inorganic anion transport	gi|4503861|ref|NP_000801.1|/0/gamma-aminobutyric acid receptor subunit alpha-5 precursor [Homo sapiens]
6591	2112	140	38	2.09941761349225	0.73286273140869	-1.51837426894869	Down	4.57914e-10	2.33793840519481e-09	SNAI2	4	GO:0043231//intracellular membrane-bounded organelle	GO:0003676//nucleic acid binding;GO:0046914//transition metal ion binding	GO:0001503//ossification;GO:0006357//regulation of transcription from RNA polymerase II promoter;GO:0006916;GO:0007267//cell-cell signaling;GO:0007275//multicellular organismal development;GO:0009628//response to abiotic stimulus;GO:0016055//Wnt receptor signaling pathway	gi|11276067|ref|NP_003059.1|/1.4983e-141/zinc finger protein SNAI2 [Homo sapiens]
138199	2219	372	101	5.30945998804731	1.8539457669677	-1.51796609380355	Down	2.07948e-24	2.29781890568395e-23	C9orf41	1	-	-	-	gi|119582971|gb|EAW62567.1|/0/chromosome 9 open reading frame 41, isoform CRA_c [Homo sapiens]
4907	4086	2434	662	18.8663082638612	6.59921961217167	-1.51544481135382	Down	4.01522e-150	2.53690203642857e-148	NT5E	1	GO:0005626//insoluble fraction;GO:0031224//intrinsic to membrane;GO:0044424//intracellular part	GO:0005506//iron ion binding;GO:0008252//nucleotidase activity	GO:0006213//pyrimidine nucleoside metabolic process;GO:0009112;GO:0009169;GO:0031348//negative regulation of defense response;GO:0044260;GO:0046085//adenosine metabolic process	gi|325651886|ref|NP_001191742.1|/0/5'-nucleotidase isoform 2 preproprotein [Homo sapiens] //gi|4505467|ref|NP_002517.1|/0/5'-nucleotidase isoform 1 preproprotein [Homo sapiens]
8609	1639	283	77	5.46855011729219	1.91357163919924	-1.51489046758429	Down	7.10818e-19	6.18243915339233e-18	KLF7	2	GO:0043231//intracellular membrane-bounded organelle	GO:0001071//nucleic acid binding transcription factor activity;GO:0003676//nucleic acid binding;GO:0003712//transcription cofactor activity;GO:0046914//transition metal ion binding	GO:0006355//regulation of transcription, DNA-dependent;GO:0006935//chemotaxis;GO:0048667//cell morphogenesis involved in neuron differentiation;GO:0048812//neuron projection morphogenesis	gi|148667781|gb|EDL00198.1|/1.09204e-149/Kruppel-like factor 7 (ubiquitous), isoform CRA_b [Mus musculus]
7074	7218	172	47	0.754703360594199	0.265224680151056	-1.50869466847177	Down	5.82292e-12	3.40090055199736e-11	TIAM1	2	GO:0030054//cell junction;GO:0044444//cytoplasmic part	GO:0004871//signal transducer activity;GO:0005088//Ras guanyl-nucleotide exchange factor activity;GO:0005102//receptor binding;GO:0008289//lipid binding	GO:0006917//induction of apoptosis;GO:0007169//transmembrane receptor protein tyrosine kinase signaling pathway;GO:0007266//Rho protein signal transduction;GO:0009966//regulation of signal transduction;GO:0019222//regulation of metabolic process;GO:0031346//positive regulation of cell projection organization	gi|115583670|ref|NP_003244.2|/0/T-lymphoma invasion and metastasis-inducing protein 1 [Homo sapiens]
25907	1876	1616	442	27.2818135832628	9.59671040316656	-1.50732768880767	Down	1.563518e-99	6.57011803752969e-98	TMEM158	2	GO:0016020//membrane	GO:0005488//binding	-	gi|116805334|ref|NP_056259.2|/5.53208e-92/transmembrane protein 158 precursor [Homo sapiens]
55022	2837	1091	299	12.17951878158	4.29284103418929	-1.50445247757281	Down	1.35541e-67	4.0232480385906e-66	PID1	1	GO:0044424//intracellular part	-	-	gi|40255260|ref|NP_060403.3|/2.27035e-135/PTB-containing, cubilin and LRP1-interacting protein isoform 1 [Homo sapiens] //gi|51555802|dbj|BAD38656.1|/2.89891e-129/putative protein product of HMFN2073 [Homo sapiens]
57116	3392	51	14	0.476188658154645	0.168114489528706	-1.50208918536121	Down	0.00022038	0.000632912756493507	ZNF695	1	-	GO:0005488//binding	-	gi|323635446|ref|NP_065127.4|/0/zinc finger protein 695 isoform 1 [Homo sapiens]//gi|323635448|ref|NP_001191150.1|/1.87347e-89/zinc finger protein 695 isoform 2 [Homo sapiens]//gi|323635448|ref|NP_001191150.1|/7.95884e-95/zinc finger protein 695 isoform 2 [Homo sapiens]
285513	6352	510	140	2.54287142389886	0.897739843327097	-1.5020891853612	Down	2.06976e-32	2.97934289340928e-31	GPRIN3	2	-	-	-	gi|40789081|dbj|BAC23123.2|/0/KIAA2027 protein [Homo sapiens]
8291	7004	182	50	0.822981296345564	0.290774837073393	-1.50095721587128	Down	1.708008e-12	1.03516168304214e-11	DYSF	1	GO:0005886//plasma membrane;GO:0012506//vesicle membrane;GO:0031224//intrinsic to membrane	GO:0005543//phospholipid binding	-	gi|195976754|ref|NP_001124448.1|/0/dysferlin isoform 9 [Homo sapiens]//gi|195976756|ref|NP_001124449.1|/0/dysferlin isoform 10 [Homo sapiens]//gi|195976758|ref|NP_001124450.1|/0/dysferlin isoform 11 [Homo sapiens]//gi|195976760|ref|NP_001124451.1|/0/dysferlin isoform 12 [Homo sapiens]//gi|195976762|ref|NP_001124452.1|/0/dysferlin isoform 13 [Homo sapiens]//gi|195976764|ref|NP_001124453.1|/0/dysfe…
201562	1187	527	145	14.0612720534336	4.97565474363936	-1.49876882706959	Down	2.46274e-33	3.62767138551207e-32	PTPLB	3	GO:0031090//organelle membrane;GO:0031224//intrinsic to membrane;GO:0043231//intracellular membrane-bounded organelle	GO:0003824//catalytic activity;GO:0005488//binding	GO:0006631//fatty acid metabolic process	gi|38257153|ref|NP_940684.1|/1.86704e-126/3-hydroxyacyl-CoA dehydratase 2 [Homo sapiens]
146057	5635	138	38	0.775621574290782	0.274677211842973	-1.49761570878189	Down	9.02822e-10	4.49657207263514e-09	TTBK2	3	-	GO:0004672//protein kinase activity;GO:0032559	GO:0006468//protein phosphorylation	gi|116812624|ref|NP_775771.3|/0/tau-tubulin kinase 2 [Homo sapiens]
3676	6082	58	16	0.302027364098214	0.107153539433715	-1.49499976057488	Down	8.36098e-05	0.000254322725550206	ITGA4	4	GO:0005887//integral to plasma membrane;GO:0009986//cell surface	GO:0004871//signal transducer activity;GO:0005515//protein binding	GO:0002682//regulation of immune system process;GO:0007166//cell surface receptor signaling pathway;GO:0007599//hemostasis;GO:0016337//cell-cell adhesion;GO:0030098//lymphocyte differentiation;GO:0048771//tissue remodeling	gi|67191027|ref|NP_000876.3|/0/integrin alpha-4 precursor [Homo sapiens]
7145	10276	959	267	2.95569234117508	1.05832759442617	-1.48170983877789	Down	2.39188e-58	6.1683307696793e-57	TNS1	4	GO:0005924//cell-substrate adherens junction;GO:0043232	GO:0008092//cytoskeletal protein binding	-	gi|145207317|gb|AAI26911.2|/0/TNS1 protein [Homo sapiens]
65065	9058	260	73	0.909087625714338	0.328264181931837	-1.46956201959575	Down	9.15636e-17	7.16114786737401e-16	NBEAL1	1	-	-	-	gi|224451124|ref|NP_001107604.1|/0/neurobeachin-like protein 1 [Homo sapiens]
160428	7555	363	102	1.52172743678691	0.549918914107024	-1.46841916147156	Down	8.49838e-23	8.79209594035088e-22	ALDH1L2	3	GO:0043231//intracellular membrane-bounded organelle	GO:0016646//oxidoreductase activity, acting on the CH-NH group of donors, NAD or NADP as acceptor;GO:0016741;GO:0019842//vitamin binding;GO:0022892	GO:0009256//10-formyltetrahydrofolate metabolic process	gi|238814322|ref|NP_001029345.2|/0/mitochondrial 10-formyltetrahydrofolate dehydrogenase precursor [Homo sapiens]
23528	3535	1321	372	11.8352684776681	4.28633860648758	-1.46527470558611	Down	1.930634e-78	6.51810039961832e-77	ZNF281	3	GO:0043231//intracellular membrane-bounded organelle	GO:0001071//nucleic acid binding transcription factor activity;GO:0043565//sequence-specific DNA binding;GO:0046914//transition metal ion binding	GO:0006357//regulation of transcription from RNA polymerase II promoter	gi|6912752|ref|NP_036614.1|/0/zinc finger protein 281 [Homo sapiens]
7745	5362	453	128	2.67569191914281	0.972335437278409	-1.46038600549355	Down	7.43152e-28	9.29123818515901e-27	ZNF192	2	GO:0031981//nuclear lumen	GO:0001071//nucleic acid binding transcription factor activity;GO:0003676//nucleic acid binding;GO:0046914//transition metal ion binding	GO:0006351//transcription, DNA-dependent	gi|56699473|ref|NP_006289.2|/0/zinc finger protein 192 [Homo sapiens]
3083	2038	60	17	0.932420440143482	0.339764262028015	-1.45644651980549	Down	8.61356e-05	0.000261600841133047	HGFAC	2	GO:0005783//endoplasmic reticulum;GO:0044421//extracellular region part	GO:0004175//endopeptidase activity;GO:0005488//binding	GO:0019538//protein metabolic process	gi|4504383|ref|NP_001519.1|/0/hepatocyte growth factor activator preproprotein [Homo sapiens]
957	2064	194	55	2.97684862936377	1.08539033660283	-1.45557189410978	Down	1.044954e-12	6.42330827449618e-12	ENTPD5	2	GO:0044432//endoplasmic reticulum part	GO:0017110//nucleoside-diphosphatase activity	GO:0006007//glucose catabolic process;GO:0006458//'de novo' protein folding;GO:0006486//protein glycosylation;GO:0009205;GO:0009966//regulation of signal transduction;GO:0040007//growth	gi|4557427|ref|NP_001240.1|/0/ectonucleoside triphosphate diphosphohydrolase 5 precursor [Homo sapiens]
55243	3628	1228	351	10.7200251213306	3.94069472194364	-1.44378639051293	Down	1.674646e-71	5.18846976987741e-70	KIRREL	5	GO:0030054//cell junction;GO:0030425//dendrite;GO:0031224//intrinsic to membrane	-	GO:0003008	gi|166295173|ref|NP_060710.3|/0/kin of IRRE-like protein 1 precursor [Homo sapiens]
1496	4005	219	63	1.73183418928722	0.640723987057721	-1.43452590154857	Down	6.79302e-14	4.4925352082243e-13	CTNNA2	1	GO:0005856//cytoskeleton;GO:0005911//cell-cell junction;GO:0031252//cell leading edge;GO:0043005//neuron projection;GO:0044444//cytoplasmic part;GO:0070161	GO:0005198//structural molecule activity;GO:0050839//cell adhesion molecule binding	GO:0007155//cell adhesion;GO:0009887//organ morphogenesis;GO:0021932;GO:0032102;GO:0045597//positive regulation of cell differentiation;GO:0048667//cell morphogenesis involved in neuron differentiation;GO:0048812//neuron projection morphogenesis;GO:0050807//regulation of synapse organization	gi|221044414|dbj|BAH13884.1|/0/unnamed protein product [Homo sapiens]//gi|259013216|ref|NP_001158355.1|/0/catenin alpha-2 isoform 2 [Homo sapiens]
4842	12291	340	98	0.876105512684379	0.32476693835893	-1.4316998574698	Down	1.024116e-20	9.77218778640777e-20	NOS1	1	GO:0005635//nuclear envelope;GO:0005766;GO:0005783//endoplasmic reticulum;GO:0005886//plasma membrane;GO:0030425//dendrite;GO:0031966//mitochondrial membrane;GO:0043232	GO:0000166//nucleotide binding;GO:0005506//iron ion binding;GO:0016597//amino acid binding;GO:0016709//oxidoreductase activity, acting on paired donors, with incorporation or reduction of molecular oxygen, NAD(P)H as one donor, and incorporation of one atom of oxygen;GO:0042802//identical protein binding;GO:0050662//coenzyme binding	GO:0000768//syncytium formation by plasma membrane fusion;GO:0001775//cell activation;GO:0006355//regulation of transcription, DNA-dependent;GO:0006525//arginine metabolic process;GO:0006813//potassium ion transport;GO:0006814//sodium ion transport;GO:0006942//regulation of striated muscle contraction;GO:0006950//response to stress;GO:0007599//hemostasis;GO:0008016//regulation of heart contractio…	gi|10835173|ref|NP_000611.1|/0/nitric oxide synthase, brain isoform 1 [Homo sapiens]//gi|323635436|ref|NP_001191147.1|/0/nitric oxide synthase, brain isoform 2 [Homo sapiens]//gi|951319|gb|AAB49040.1|/0/nitric oxide synthase [Homo sapiens]
201191	3316	52	15	0.496653541237664	0.184250931139509	-1.43056788797989	Down	0.000318656	0.000895527132009531	SAMD14	1	-	-	-	gi|28557802|ref|NP_777580.1|/5.58307e-157/sterile alpha motif domain-containing protein 14 isoform 1 [Homo sapiens] //gi|383209653|ref|NP_001244288.1|/2.21649e-150/sterile alpha motif domain-containing protein 14 isoform 2 [Homo sapiens]
64131	9336	103	30	0.349414639160738	0.130886051340748	-1.41662869702201	Down	4.00768e-07	1.58648169344372e-06	XYLT1	3	GO:0012505//endomembrane system;GO:0031090//organelle membrane;GO:0031224//intrinsic to membrane;GO:0043231//intracellular membrane-bounded organelle	GO:0035252//UDP-xylosyltransferase activity	GO:0006023;GO:0006029//proteoglycan metabolic process;GO:0009408//response to heat;GO:0032102;GO:0034097//response to cytokine stimulus	gi|28269693|ref|NP_071449.1|/0/xylosyltransferase 1 precursor [Homo sapiens]
4015	5177	168	49	1.02776975075039	0.385523511625421	-1.41462634411086	Down	8.79386e-11	4.75465089425428e-10	LOX	1	GO:0005578//proteinaceous extracellular matrix;GO:0043231//intracellular membrane-bounded organelle	GO:0016641//oxidoreductase activity, acting on the CH-NH2 group of donors, oxygen as acceptor;GO:0046914//transition metal ion binding	GO:0001944//vasculature development;GO:0009611//response to wounding;GO:0009725//response to hormone stimulus;GO:0030323//respiratory tube development;GO:0043412//macromolecule modification;GO:0085029//extracellular matrix assembly	gi|14279461|gb|AAK58603.1|AF270645_1/0/lysyl oxidase [Homo sapiens]//gi|194387404|dbj|BAG60066.1|/1.30702e-124/unnamed protein product [Homo sapiens]
91584	13061	75	22	0.181865176576489	0.0686087023887374	-1.4064058373059	Down	1.794618e-05	5.92103450913838e-05	PLXNA4	1	GO:0031224//intrinsic to membrane	GO:0004888//transmembrane signaling receptor activity;GO:0005488//binding	GO:0006935//chemotaxis;GO:0007166//cell surface receptor signaling pathway;GO:0007422//peripheral nervous system development;GO:0021537//telencephalon development;GO:0021559//trigeminal nerve development;GO:0021561//facial nerve development;GO:0021563//glossopharyngeal nerve development;GO:0021564//vagus nerve development;GO:0021785//branchiomotor neuron axon guidance;GO:0023052//signaling;GO:003…	gi|157738643|ref|NP_861440.2|/0/plexin-A4 isoform 2 precursor [Homo sapiens]//gi|157738645|ref|NP_065962.1|/0/plexin-A4 isoform 1 precursor [Homo sapiens]//gi|157738647|ref|NP_001099013.1|/0/plexin-A4 isoform 3 precursor [Homo sapiens]
25900	2816	160	47	1.79950081156479	0.679826612688324	-1.40435800865704	Down	3.09242e-10	1.60434024105572e-09	IFFO1	2	-	-	-	gi|259016254|sp|Q0D2I5.2|IFFO1_HUMAN/0/RecName: Full=Intermediate filament family orphan 1; AltName: Full=Tumor antigen HOM-TES-103 //gi|301500709|ref|NP_001180386.1|/0/intermediate filament family orphan 1 isoform 5 [Homo sapiens] //gi|302148456|ref|NP_542768.2|/0/intermediate filament family orphan 1 isoform 2 [Homo sapiens]//gi|89213250|ref|NP_001034759.1|/0/intermediate filament family orphan…
9480	16142	136	40	0.266837141776823	0.100933562575247	-1.40255351181029	Down	6.95434e-09	3.23335687095926e-08	ONECUT2	2	GO:0043231//intracellular membrane-bounded organelle	GO:0001071//nucleic acid binding transcription factor activity;GO:0003677//DNA binding	GO:0006357//regulation of transcription from RNA polymerase II promoter;GO:0007160//cell-matrix adhesion;GO:0007179//transforming growth factor beta receptor signaling pathway;GO:0010927;GO:0016477//cell migration;GO:0030855//epithelial cell differentiation;GO:0031016//pancreas development;GO:0048666//neuron development	gi|119220564|ref|NP_004843.2|/0/one cut domain family member 2 [Homo sapiens]
586	9682	163	48	0.533196439601019	0.20193384429948	-1.40078441895723	Down	2.27864e-10	1.19441245155556e-09	BCAT1	1	GO:0043231//intracellular membrane-bounded organelle;GO:0044444//cytoplasmic part	GO:0004084//branched-chain-amino-acid transaminase activity;GO:0005515//protein binding	GO:0008652//cellular amino acid biosynthetic process;GO:0009063//cellular amino acid catabolic process;GO:0022402//cell cycle process	gi|296010900|ref|NP_001171562.1|/0/branched-chain-amino-acid aminotransferase, cytosolic isoform 2 [Homo sapiens] //gi|296010904|ref|NP_001171564.1|/0/branched-chain-amino-acid aminotransferase, cytosolic isoform 4 [Homo sapiens]//gi|296010906|ref|NP_001171565.1|/0/branched-chain-amino-acid aminotransferase, cytosolic isoform 5 [Homo sapiens] //gi|38176287|ref|NP_005495.2|/0/branched-chain-amino-…
64093	3716	3323	980	28.321702116309	10.7419548960431	-1.39865140413677	Down	1.349268e-181	1.04235372e-179	SMOC1	5	GO:0005578//proteinaceous extracellular matrix	GO:0046872//metal ion binding	GO:0010810//regulation of cell-substrate adhesion;GO:0023052//signaling;GO:0043062//extracellular structure organization	gi|11545873|ref|NP_071420.1|/0/SPARC-related modular calcium-binding protein 1 isoform 2 precursor [Homo sapiens]//gi|78190498|ref|NP_001030024.1|/0/SPARC-related modular calcium-binding protein 1 isoform 1 precursor [Homo sapiens]
79598	4439	356	105	2.5399757343862	0.963467585854988	-1.39850667874759	Down	6.25656e-21	6.04504658438012e-20	CEP97	2	GO:0005815//microtubule organizing center;GO:0031981//nuclear lumen	GO:0005488//binding	-	gi|31377705|ref|NP_078824.2|/0/centrosomal protein of 97 kDa [Homo sapiens]
79805	4337	149	44	1.08808183727173	0.413234153515932	-1.39675566727217	Down	1.476628e-09	7.23830034580216e-09	VASH2	1	GO:0044424//intracellular part	-	GO:0001935//endothelial cell proliferation;GO:0045765//regulation of angiogenesis	gi|158255382|dbj|BAF83662.1|/1.75448e-136/unnamed protein product [Homo sapiens]//gi|31982921|ref|NP_079025.2|/2.10533e-159/vasohibin-2 isoform 1 [Homo sapiens]//gi|62511209|sp|Q86V25.2|VASH2_HUMAN/5.42563e-176/RecName: Full=Vasohibin-2; AltName: Full=Vasohibin-like protein
91683	3632	540	161	4.70882591220037	1.8055644293876	-1.38291748438353	Down	1.838156e-30	2.49760505345622e-29	SYT12	1	GO:0008021//synaptic vesicle;GO:0031224//intrinsic to membrane;GO:0044459//plasma membrane part	-	GO:0050804//regulation of synaptic transmission	gi|29366828|ref|NP_808878.1|/0/synaptotagmin-12 [Homo sapiens]
57181	5386	3758	1122	22.0981105231237	8.48514878515861	-1.38091115625857	Down	3.01782e-201	2.53024898672986e-199	SLC39A10	1	GO:0031224//intrinsic to membrane	GO:0008324//cation transmembrane transporter activity	GO:0000041//transition metal ion transport	gi|6331192|dbj|BAA86579.1|/0/KIAA1265 protein [Homo sapiens]
650623	5923	177	53	0.946446889783324	0.364474451526889	-1.37670386096711	Down	6.80198e-11	3.70714196487985e-10	LOC650623	1	-	-	-	gi|296198919|ref|XP_002746938.1|/1.4421e-137/PREDICTED: BEN domain-containing protein 3 [Callithrix jacchus]
285761	2010	2412	723	38.0054571402483	14.6512673756941	-1.37518112039628	Down	4.57912e-129	2.44740821510574e-127	DCBLD1	1	GO:0031224//intrinsic to membrane	-	GO:0009987//cellular process	gi|27735143|ref|NP_775945.1|/0/discoidin, CUB and LCCL domain-containing protein 1 precursor [Homo sapiens]
8614	5361	1628	488	9.61774610214579	3.70772033547725	-1.37516641215067	Down	1.021176e-87	3.8601762e-86	STC2	2	-	GO:0005102//receptor binding	GO:0001666//response to hypoxia;GO:0003006//developmental process involved in reproduction;GO:0007154//cell communication;GO:0007165//signal transduction;GO:0007275//multicellular organismal development;GO:0009725//response to hormone stimulus;GO:0033273//response to vitamin	gi|4507267|ref|NP_003705.1|/5.66966e-178/stanniocalcin-2 precursor [Homo sapiens]
85301	5583	1601	483	9.08214473722873	3.52380978373766	-1.36589697912779	Down	1.957358e-85	7.19908947567567e-84	COL27A1	2	GO:0005581//collagen	-	-	gi|32140760|ref|NP_116277.2|/0/collagen alpha-1(XXVII) chain preproprotein [Homo sapiens]
23057	5579	149	45	0.845852469662574	0.328540645810331	-1.3643341895798	Down	2.83612e-09	1.35825118895506e-08	NMNAT2	3	GO:0012505//endomembrane system;GO:0043231//intracellular membrane-bounded organelle	GO:0032559;GO:0070566//adenylyltransferase activity	GO:0019359//nicotinamide nucleotide biosynthetic process	gi|25141325|ref|NP_733820.1|/5.43572e-168/nicotinamide mononucleotide adenylyltransferase 2 isoform 2 [Homo sapiens]//gi|3413920|dbj|BAA32324.1|/0/KIAA0479 protein [Homo sapiens]
6641	4975	96	29	0.611143029390928	0.237431243445223	-1.3640002710409	Down	2.0017e-06	7.36064741218042e-06	SNTB1	3	GO:0043232;GO:0043234//protein complex;GO:0044459//plasma membrane part	GO:0008092//cytoskeletal protein binding;GO:0019904//protein domain specific binding	GO:0003012//muscle system process	gi|119612414|gb|EAW92008.1|/0/syntrophin, beta 1 (dystrophin-associated protein A1, 59kDa, basic component 1) [Homo sapiens]
7057	5820	5374	1625	29.2441762130147	11.3726934988001	-1.36257536865729	Down	3.22546e-281	3.75405347763158e-279	THBS1	2	GO:0005615//extracellular space;GO:0009986//cell surface;GO:0031091//platelet alpha granule	GO:0001948//glycoprotein binding;GO:0005102//receptor binding;GO:0005518//collagen binding;GO:0005539//glycosaminoglycan binding;GO:0005543//phospholipid binding;GO:0017134//fibroblast growth factor binding;GO:0032403//protein complex binding;GO:0043498//cell surface binding;GO:0046872//metal ion binding;GO:0071813//lipoprotein particle binding	GO:0000165//MAPK cascade;GO:0001818//negative regulation of cytokine production;GO:0001935//endothelial cell proliferation;GO:0001953//negative regulation of cell-matrix adhesion;GO:0002468;GO:0002504//antigen processing and presentation of peptide or polysaccharide antigen via MHC class II;GO:0002690//positive regulation of leukocyte chemotaxis;GO:0002696//positive regulation of leukocyte activa…	gi|62089410|dbj|BAD93149.1|/0/thrombospondin 1 precursor variant [Homo sapiens]
25884	1699	79	24	1.47264622036473	0.575374773545486	-1.35583701290325	Down	1.831634e-05	6.03528349674055e-05	CHRDL2	3	GO:0043231//intracellular membrane-bounded organelle	-	GO:0009888//tissue development;GO:0030509//BMP signaling pathway;GO:0032501//multicellular organismal process;GO:0048869//cellular developmental process	gi|40353769|ref|NP_056239.3|/0/chordin-like protein 2 precursor [Homo sapiens]
8728	6506	5342	1628	26.0048611593409	10.1923257578463	-1.35129804181617	Down	4.39548e-276	4.98464337692307e-274	ADAM19	3	GO:0031224//intrinsic to membrane	GO:0004175//endopeptidase activity;GO:0019904//protein domain specific binding;GO:0046914//transition metal ion binding	GO:0019538//protein metabolic process	gi|15451844|ref|NP_150377.1|/0/disintegrin and metalloproteinase domain-containing protein 19 preproprotein [Homo sapiens]
11174	7289	141	43	0.612654851691478	0.240288761780952	-1.35030536314401	Down	9.91024e-09	4.55027396418375e-08	ADAMTS6	2	GO:0031012//extracellular matrix	GO:0004175//endopeptidase activity;GO:0046914//transition metal ion binding	GO:0019538//protein metabolic process	gi|64276808|ref|NP_922932.2|/0/A disintegrin and metalloproteinase with thrombospondin motifs 6 preproprotein [Homo sapiens]
8091	4150	141	43	1.0760581238504	0.422039707137676	-1.350305363144	Down	9.91024e-09	4.55145523987539e-08	HMGA2	1	GO:0005694//chromosome;GO:0043231//intracellular membrane-bounded organelle;GO:0044446//intracellular organelle part	GO:0003676//nucleic acid binding;GO:0003677//DNA binding	GO:0006351//transcription, DNA-dependent;GO:0006996//organelle organization;GO:0050794//regulation of cellular process	gi|347311054|gb|AEO79122.1|/5.17248e-14/high mobility group AT-hook 2 protein [Sus scrofa]//gi|62912482|ref|NP_003475.1|/1.6133e-22/high mobility group protein HMGI-C isoform b [Homo sapiens]
145483	3602	206	63	1.81129098900869	0.712409652461459	-1.34623936913061	Down	4.3444e-12	2.55933334665335e-11	FAM161B	2	-	-	-	gi|333609271|ref|NP_689658.2|/0/protein FAM161B [Homo sapiens]
165215	3557	214	66	1.9054371258582	0.755775874528506	-1.33409163249	Down	2.36232e-12	1.41667129220339e-11	FAM171B	3	GO:0031224//intrinsic to membrane	GO:0003676//nucleic acid binding	-	gi|116875848|ref|NP_803237.3|/0/protein FAM171B precursor [Homo sapiens]
2752	4737	693	214	4.63334420487511	1.84010812411432	-1.33226332118338	Down	1.317356e-36	2.13810504550459e-35	GLUL	2	GO:0043231//intracellular membrane-bounded organelle;GO:0044444//cytoplasmic part	GO:0005515//protein binding;GO:0016211;GO:0016831//carboxy-lyase activity;GO:0032559	GO:0001505//regulation of neurotransmitter levels;GO:0006541//glutamine metabolic process;GO:0009746	gi|19923206|ref|NP_002056.2|/0/glutamine synthetase [Homo sapiens]//gi|355690389|gb|AER99137.1|/0/glutamate-ammonia ligase [Mustela putorius furo]
9066	6413	110	34	0.543245528019559	0.215948718544548	-1.33091563772163	Down	5.74878e-07	2.23963151244219e-06	SYT7	3	GO:0000323//lytic vacuole;GO:0005626//insoluble fraction;GO:0008021//synaptic vesicle;GO:0031224//intrinsic to membrane;GO:0044459//plasma membrane part	GO:0046872//metal ion binding	GO:0007009//plasma membrane organization;GO:0017156//calcium ion-dependent exocytosis;GO:0030073//insulin secretion	gi|354983504|ref|NP_001238994.1|/0/synaptotagmin-7 isoform 1 [Homo sapiens]//gi|38570146|ref|NP_004191.2|/0/synaptotagmin-7 isoform 2 [Homo sapiens]
1289	8439	17504	5420	65.6917804027834	26.1602116768154	-1.32833865199864	Down	0	0	COL5A1	3	GO:0005583//fibrillar collagen	GO:0001948//glycoprotein binding;GO:0005198//structural molecule activity;GO:0005539//glycosaminoglycan binding;GO:0019838//growth factor binding	GO:0006935//chemotaxis;GO:0008544//epidermis development;GO:0009059//macromolecule biosynthetic process;GO:0009887//organ morphogenesis;GO:0030198//extracellular matrix organization;GO:0044319//wound healing, spreading of cells;GO:0072358//cardiovascular system development	gi|219510|dbj|BAA14323.1|/0/collagen alpha 1(V) chain precursor [Homo sapiens]
5352	4072	19995	6203	155.517173280793	62.0478826415582	-1.32562001657305	Down	0	0	PLOD2	2	GO:0005789//endoplasmic reticulum membrane	GO:0016701//oxidoreductase activity, acting on single donors with incorporation of molecular oxygen;GO:0019842//vitamin binding;GO:0046914//transition metal ion binding;GO:0070815//peptidyl-lysine 5-dioxygenase activity	GO:0006950//response to stress;GO:0043412//macromolecule modification	gi|33636742|ref|NP_891988.1|/0/procollagen-lysine,2-oxoglutarate 5-dioxygenase 2 isoform 1 precursor [Homo sapiens]//gi|62089344|dbj|BAD93116.1|/0/procollagen-lysine, 2-oxoglutarate 5-dioxygenase 2 isoform b variant [Homo sapiens]
4035	14905	9497	2953	20.1799075512098	8.06983064678915	-1.3223092625613	Down	0	0	LRP1	2	GO:0005626//insoluble fraction;GO:0012505//endomembrane system;GO:0016021//integral to membrane;GO:0030135//coated vesicle;GO:0043005//neuron projection;GO:0044297//cell body	GO:0004871//signal transducer activity;GO:0005102//receptor binding;GO:0008565//protein transporter activity;GO:0019899//enzyme binding;GO:0034185//apolipoprotein binding;GO:0046872//metal ion binding	GO:0006909//phagocytosis;GO:0007186//G-protein coupled receptor signaling pathway;GO:0010466//negative regulation of peptidase activity;GO:0010517//regulation of phospholipase activity;GO:0010874//regulation of cholesterol efflux;GO:0015031//protein transport;GO:0016055//Wnt receptor signaling pathway;GO:0032501//multicellular organismal process;GO:0032502//developmental process;GO:0044260;GO:004…	gi|126012562|ref|NP_002323.2|/0/prolow-density lipoprotein receptor-related protein 1 precursor [Homo sapiens]
5033	2953	3050	949	32.7115487859119	13.0898816387408	-1.32134801576381	Down	3.06102e-153	1.96918199345454e-151	P4HA1	3	GO:0044432//endoplasmic reticulum part	GO:0016701//oxidoreductase activity, acting on single donors with incorporation of molecular oxygen;GO:0019798;GO:0019842//vitamin binding;GO:0046914//transition metal ion binding	GO:0019471;GO:0030198//extracellular matrix organization	gi|217272851|ref|NP_001136068.1|/0/prolyl 4-hydroxylase subunit alpha-1 isoform 3 precursor [Homo sapiens] //gi|383418719|gb|AFH32573.1|/0/prolyl 4-hydroxylase subunit alpha-1 isoform 2 precursor [Macaca mulatta]//gi|383418721|gb|AFH32574.1|/0/prolyl 4-hydroxylase subunit alpha-1 isoform 1 precursor [Macaca mulatta]
5799	4842	276	86	1.80529845978049	0.723446833796513	-1.31927846752338	Down	2.75352e-15	1.97937920845185e-14	PTPRN2	2	GO:0005626//insoluble fraction;GO:0016021//integral to membrane;GO:0016023//cytoplasmic membrane-bounded vesicle;GO:0033267//axon part	GO:0004725//protein tyrosine phosphatase activity;GO:0004871//signal transducer activity;GO:0005488//binding	GO:0006464//cellular protein modification process;GO:0006796//phosphate-containing compound metabolic process;GO:0043087//regulation of GTPase activity	gi|194097438|ref|NP_570857.2|/0/receptor-type tyrosine-protein phosphatase N2 isoform 2 precursor [Homo sapiens]//gi|194097440|ref|NP_002838.2|/0/receptor-type tyrosine-protein phosphatase N2 isoform 1 precursor [Homo sapiens]//gi|194097442|ref|NP_570858.2|/0/receptor-type tyrosine-protein phosphatase N2 isoform 3 precursor [Homo sapiens]
290	3740	5584	1743	47.286647208366	18.9827329908906	-1.31674513753128	Down	2.04486e-277	2.33391085548387e-275	ANPEP	2	GO:0000267//cell fraction;GO:0012505//endomembrane system;GO:0016021//integral to membrane;GO:0031988//membrane-bounded vesicle;GO:0044444//cytoplasmic part	GO:0004871//signal transducer activity;GO:0008238//exopeptidase activity;GO:0046914//transition metal ion binding	GO:0019538//protein metabolic process;GO:0032501//multicellular organismal process;GO:0044237//cellular metabolic process;GO:0048646//anatomical structure formation involved in morphogenesis;GO:0048869//cellular developmental process;GO:0051704	gi|62089422|dbj|BAD93155.1|/0/membrane alanine aminopeptidase precursor variant [Homo sapiens]
7052	3937	62404	19487	502.009259880632	201.610211162533	-1.31614526548268	Down	0	0	TGM2	1	-	GO:0016747//transferase activity, transferring acyl groups other than amino-acyl groups;GO:0016755;GO:0043169//cation binding	GO:0006464//cellular protein modification process;GO:0006909//phagocytosis;GO:0030155//regulation of cell adhesion;GO:0060605;GO:0061138//morphogenesis of a branching epithelium	gi|39777597|ref|NP_004604.2|/0/protein-glutamine gamma-glutamyltransferase 2 isoform a [Homo sapiens]//gi|39777599|ref|NP_945189.1|/0/protein-glutamine gamma-glutamyltransferase 2 isoform b [Homo sapiens]
30817	6771	80	25	0.374198366959566	0.150390411967364	-1.31509067055995	Down	2.51976e-05	8.17927966238532e-05	EMR2	2	GO:0016020//membrane;GO:0031224//intrinsic to membrane	GO:0004888//transmembrane signaling receptor activity;GO:0046872//metal ion binding	GO:0007186//G-protein coupled receptor signaling pathway	gi|23397681|ref|NP_038475.2|/0/EGF-like module-containing mucin-like hormone receptor-like 2 isoform a precursor [Homo sapiens]//gi|23397683|ref|NP_690880.1|/0/EGF-like module-containing mucin-like hormone receptor-like 2 isoform b precursor [Homo sapiens]//gi|23397685|ref|NP_690881.1|/0/EGF-like module-containing mucin-like hormone receptor-like 2 isoform c precursor [Homo sapiens]//gi|23397687|…
100287314	1895	547	171	9.14203388553907	3.67552897061118	-1.31456327335397	Down	1.125004e-28	1.44534827625272e-27	LOC100287314	1	-	-	-	gi|158260771|dbj|BAF82563.1|/1.35791e-29/unnamed protein product [Homo sapiens]
4046	2072	134	42	2.04823490057645	0.825643361700828	-1.31079053312633	Down	4.7245e-08	2.04755339294463e-07	LSP1	1	GO:0005856//cytoskeleton;GO:0016020//membrane;GO:0043231//intracellular membrane-bounded organelle	GO:0008092//cytoskeletal protein binding;GO:0060089	GO:0006952//defense response;GO:0009987//cellular process	gi|10880979|ref|NP_002330.1|/4.82271e-175/lymphocyte-specific protein 1 isoform 1 [Homo sapiens]//gi|339409180|ref|NP_001229861.1|/0/lymphocyte-specific protein 1 isoform 3 [Homo sapiens]//gi|339409180|ref|NP_001229861.1|/2.14992e-165/lymphocyte-specific protein 1 isoform 3 [Homo sapiens]//gi|339409180|ref|NP_001229861.1|/2.47949e-165/lymphocyte-specific protein 1 isoform 3 [Homo sapiens]//gi|339…
6792	3434	70	22	0.645598427445492	0.260948824082498	-1.30687016375498	Down	8.99124e-05	0.000272603302210797	CDKL5	1	GO:0001726//ruffle;GO:0030425//dendrite;GO:0030426//growth cone;GO:0031981//nuclear lumen	GO:0004674//protein serine/threonine kinase activity;GO:0017048//Rho GTPase binding;GO:0032559	GO:0006468//protein phosphorylation;GO:0010975//regulation of neuron projection development;GO:0016477//cell migration;GO:0030307//positive regulation of cell growth;GO:0031346//positive regulation of cell projection organization;GO:0032321//positive regulation of Rho GTPase activity	gi|4507281|ref|NP_003150.1|/0/cyclin-dependent kinase-like 5 [Homo sapiens]
3764	2406	178	56	2.34309066603083	0.948037154582497	-1.30539727435611	Down	3.29742e-10	1.70668979578701e-09	KCNJ8	3	GO:0005887//integral to plasma membrane;GO:0042598;GO:0043231//intracellular membrane-bounded organelle;GO:0043292//contractile fiber	GO:0005242//inward rectifier potassium channel activity;GO:0032559	GO:0002237//response to molecule of bacterial origin;GO:0002252;GO:0009628//response to abiotic stimulus;GO:0043331//response to dsRNA;GO:0048513//organ development;GO:0050880//regulation of blood vessel size;GO:0071805//potassium ion transmembrane transport	gi|4826802|ref|NP_004973.1|/0/ATP-sensitive inward rectifier potassium channel 8 [Homo sapiens]
7837	6821	8288	2619	38.4827773027389	15.6394113627318	-1.29902670878327	Down	0	0	PXDN	1	GO:0031012//extracellular matrix;GO:0043231//intracellular membrane-bounded organelle	GO:0003824//catalytic activity;GO:0005126//cytokine receptor binding;GO:0005198//structural molecule activity;GO:0005506//iron ion binding;GO:0016209//antioxidant activity	GO:0001959//regulation of cytokine-mediated signaling pathway;GO:0002376//immune system process;GO:0006950//response to stress;GO:0042743//hydrogen peroxide metabolic process;GO:0043062//extracellular structure organization	gi|6273399|gb|AAF06354.1|AF200348_1/0/melanoma-associated antigen MG50 [Homo sapiens]
81792	4955	193	61	1.23361137370803	0.501440179578545	-1.29873846515251	Down	7.01982e-11	3.81998263980314e-10	ADAMTS12	2	GO:0031012//extracellular matrix	GO:0004175//endopeptidase activity;GO:0046914//transition metal ion binding	GO:0019538//protein metabolic process	gi|51558724|ref|NP_112217.2|/0/A disintegrin and metalloproteinase with thrombospondin motifs 12 preproprotein [Homo sapiens]
56479	6652	63	20	0.299952871296308	0.122464639739149	-1.29237059405986	Down	0.000234274	0.000669554335056543	KCNQ5	1	GO:0005887//integral to plasma membrane	GO:0005249//voltage-gated potassium channel activity	GO:0007267//cell-cell signaling;GO:0030001//metal ion transport;GO:0065003	gi|236461719|ref|NP_001153602.1|/0/potassium voltage-gated channel subfamily KQT member 5 isoform 2 [Homo sapiens]//gi|236461942|ref|NP_001153604.1|/0/potassium voltage-gated channel subfamily KQT member 5 isoform 3 [Homo sapiens]//gi|236462079|ref|NP_001153605.1|/0/potassium voltage-gated channel subfamily KQT member 5 isoform 4 [Homo sapiens]//gi|236462242|ref|NP_001153606.1|/0/potassium voltag…
10905	5388	673	214	3.95596273437688	1.61777880176866	-1.29001447365648	Down	5.77492e-34	8.65064434546994e-33	MAN1A2	3	GO:0005626//insoluble fraction;GO:0012505//endomembrane system;GO:0031224//intrinsic to membrane;GO:0043231//intracellular membrane-bounded organelle	GO:0015924;GO:0046872//metal ion binding	GO:0006487//protein N-linked glycosylation;GO:0032501//multicellular organismal process;GO:0048856//anatomical structure development	gi|5729913|ref|NP_006690.1|/0/mannosyl-oligosaccharide 1,2-alpha-mannosidase IB [Homo sapiens]
8038	6093	788	251	4.09599817092233	1.67793640792507	-1.28752703095292	Down	2.23464e-39	3.89104490551181e-38	ADAM12	3	GO:0031224//intrinsic to membrane	GO:0004175//endopeptidase activity;GO:0019904//protein domain specific binding;GO:0046914//transition metal ion binding	GO:0000768//syncytium formation by plasma membrane fusion;GO:0007169//transmembrane receptor protein tyrosine kinase signaling pathway;GO:0019538//protein metabolic process	gi|73747885|ref|NP_003465.3|/0/disintegrin and metalloproteinase domain-containing protein 12 isoform 1 preproprotein [Homo sapiens]//gi|73747887|ref|NP_067673.2|/0/disintegrin and metalloproteinase domain-containing protein 12 isoform 2 preproprotein [Homo sapiens]
57514	8096	1105	352	4.3227139060415	1.77094518161917	-1.2874178010888	Down	1.561744e-54	3.77959139589603e-53	ARHGAP31	2	GO:0005924//cell-substrate adherens junction;GO:0031252//cell leading edge;GO:0044444//cytoplasmic part	GO:0008047//enzyme activator activity;GO:0019904//protein domain specific binding	GO:0009966//regulation of signal transduction;GO:0035556//intracellular signal transduction	gi|186928844|ref|NP_065805.2|/0/rho GTPase-activating protein 31 [Homo sapiens]
90427	4700	364	116	2.45283446791674	1.00529398820424	-1.28683241051844	Down	5.153e-19	4.5062641127039e-18	BMF	3	GO:0015629//actin cytoskeleton;GO:0030141//secretory granule;GO:0031966//mitochondrial membrane	GO:0005488//binding	GO:0001836//release of cytochrome c from mitochondria;GO:0006917//induction of apoptosis;GO:0032461//positive regulation of protein oligomerization	gi|10440458|dbj|BAB15762.1|/1.51368e-99/FLJ00065 protein [Homo sapiens]//gi|38511854|gb|AAH60783.1|/3.97119e-119/BMF protein, partial [Homo sapiens]//gi|51558701|ref|NP_001003942.1|/2.11743e-82/bcl-2-modifying factor isoform bmf-2 [Homo sapiens]//gi|51558704|ref|NP_001003943.1|/2.79683e-71/bcl-2-modifying factor isoform bmf-3 [Homo sapiens]
8013	5707	69	22	0.382918133093443	0.157017393008463	-1.28611160358818	Down	0.0001230166	0.000366316557919542	NR4A3	2	GO:0031981//nuclear lumen;GO:0043234//protein complex	GO:0000982//RNA polymerase II core promoter proximal region sequence-specific DNA binding transcription factor activity;GO:0003676//nucleic acid binding;GO:0003677//DNA binding;GO:0004879//ligand-activated sequence-specific DNA binding RNA polymerase II transcription factor activity;GO:0046872//metal ion binding;GO:0046914//transition metal ion binding	GO:0001704//formation of primary germ layer;GO:0006935//chemotaxis;GO:0006950//response to stress;GO:0007610//behavior;GO:0009755//hormone-mediated signaling pathway;GO:0009887//organ morphogenesis;GO:0021543//pallium development;GO:0035239//tube morphogenesis;GO:0042471//ear morphogenesis;GO:0043065//positive regulation of apoptotic process;GO:0043066//negative regulation of apoptotic process;GO…	gi|1311505|gb|AAB36006.1|/0/steroid/thyroid orphan receptor homolog gene [Homo sapiens]//gi|1311505|gb|AAB36006.1|/1.64633e-177/steroid/thyroid orphan receptor homolog gene [Homo sapiens]
152485	4197	282	90	2.12801582748591	0.873446872993013	-1.28471702151643	Down	5.01866e-15	3.56137641636582e-14	ZNF827	3	GO:0043231//intracellular membrane-bounded organelle	GO:0003676//nucleic acid binding;GO:0046914//transition metal ion binding	-	gi|296478784|gb|DAA20899.1|/0/RE1-silencing transcription factor-like [Bos taurus]
92737	3272	827	264	8.00491876909774	3.28642394339596	-1.28436816526013	Down	4.28114e-41	7.84033620496894e-40	DNER	3	GO:0005768//endosome;GO:0031224//intrinsic to membrane;GO:0043005//neuron projection;GO:0044297//cell body	GO:0004872//receptor activity;GO:0005102//receptor binding;GO:0046872//metal ion binding	GO:0007166//cell surface receptor signaling pathway;GO:0007399//nervous system development;GO:0016192//vesicle-mediated transport;GO:0016477//cell migration;GO:0044267//cellular protein metabolic process;GO:0048747//muscle fiber development	gi|116235485|ref|NP_620711.3|/0/delta and Notch-like epidermal growth factor-related receptor precursor [Homo sapiens]
8534	3947	119	38	0.954870661196173	0.392147476244021	-1.28390901531167	Down	4.16084e-07	1.64563873105298e-06	CHST1	5	GO:0012505//endomembrane system;GO:0031224//intrinsic to membrane;GO:0043231//intracellular membrane-bounded organelle	GO:0008146//sulfotransferase activity	GO:0006790//sulfur compound metabolic process;GO:0006952//defense response;GO:0019318//hexose metabolic process	gi|4502841|ref|NP_003645.1|/0/carbohydrate sulfotransferase 1 precursor [Homo sapiens]
84206	3398	546	175	5.08901795138699	2.09772052855125	-1.27856479453483	Down	1.687834e-27	2.07357439541667e-26	MEX3B	3	GO:0044424//intracellular part	GO:0046872//metal ion binding	GO:0006468//protein phosphorylation	gi|50511245|dbj|BAD32608.1|/0/mKIAA2009 protein [Mus musculus]
56999	7335	159	51	0.686533479356906	0.283206366467523	-1.27747637876017	Down	5.28084e-09	2.48466330957447e-08	ADAMTS9	1	GO:0031012//extracellular matrix	GO:0004175//endopeptidase activity;GO:0046914//transition metal ion binding	GO:0009057//macromolecule catabolic process;GO:0019538//protein metabolic process;GO:0032501//multicellular organismal process	gi|33624896|ref|NP_891550.1|/0/A disintegrin and metalloproteinase with thrombospondin motifs 9 preproprotein [Homo sapiens]
151295	2418	112	36	1.46698759295141	0.606427878569343	-1.2744486860626	Down	1.059314e-06	4.00177748750801e-06	SLC23A3	1	GO:0016020//membrane;GO:0031224//intrinsic to membrane	GO:0005488//binding	GO:0006810//transport	gi|158635944|ref|NP_653313.3|/0/solute carrier family 23 member 3 isoform 1 [Homo sapiens]//gi|222080105|ref|NP_001138361.1|/0/solute carrier family 23 member 3 isoform 2 [Homo sapiens]//gi|222080107|ref|NP_001138362.1|/0/solute carrier family 23 member 3 isoform 3 [Homo sapiens]
3673	7878	4343	1397	17.4597719768235	7.22292963069377	-1.27337869749174	Down	1.789358e-205	1.55174178323529e-203	ITGA2	3	GO:0005887//integral to plasma membrane;GO:0005924//cell-substrate adherens junction;GO:0009986//cell surface;GO:0019867//outer membrane;GO:0033267//axon part;GO:0043231//intracellular membrane-bounded organelle;GO:0044444//cytoplasmic part	GO:0004871//signal transducer activity;GO:0005102//receptor binding;GO:0046983//protein dimerization activity	GO:0002684//positive regulation of immune system process;GO:0006412//translation;GO:0006939//smooth muscle contraction;GO:0006970//response to osmotic stress;GO:0007166//cell surface receptor signaling pathway;GO:0007599//hemostasis;GO:0008284//positive regulation of cell proliferation;GO:0010557//positive regulation of macromolecule biosynthetic process;GO:0010631//epithelial cell migration;GO:0…	gi|116295258|ref|NP_002194.2|/0/integrin alpha-2 precursor [Homo sapiens]
6671	5811	230	74	1.25355004047742	0.518697074361697	-1.27305545076274	Down	2.3167e-12	1.39119958248472e-11	SP4	3	GO:0043231//intracellular membrane-bounded organelle	GO:0001071//nucleic acid binding transcription factor activity;GO:0003712//transcription cofactor activity;GO:0046872//metal ion binding	GO:0006355//regulation of transcription, DNA-dependent;GO:0044057	gi|388453281|ref|NP_001253757.1|/0/transcription factor Sp4 [Macaca mulatta]
137970	7290	326	105	1.41629847139014	0.586671140412934	-1.27150140201226	Down	6.75174e-17	5.31102856113828e-16	UNC5D	2	GO:0031224//intrinsic to membrane	GO:0004871//signal transducer activity	GO:0006935//chemotaxis;GO:0012501//programmed cell death;GO:0023052//signaling;GO:0032501//multicellular organismal process	gi|209977117|ref|NP_543148.2|/0/netrin receptor UNC5D precursor [Homo sapiens]
6331	8504	62	20	0.230904901879057	0.0957943066256841	-1.26928698094683	Down	0.00032017	0.000899639051778907	SCN5A	1	GO:0005887//integral to plasma membrane	GO:0005272//sodium channel activity;GO:0005488//binding	GO:0003012//muscle system process;GO:0003013;GO:0030001//metal ion transport;GO:0044057	gi|150417967|ref|NP_001092874.1|/0/sodium channel protein type 5 subunit alpha isoform c [Homo sapiens]//gi|150417969|ref|NP_001092875.1|/0/sodium channel protein type 5 subunit alpha isoform d [Homo sapiens]//gi|237512980|ref|NP_001153632.1|/0/sodium channel protein type 5 subunit alpha isoform e [Homo sapiens]//gi|237512982|ref|NP_001153633.1|/0/sodium channel protein type 5 subunit alpha isofo…
1306	5273	251	81	1.50758103265098	0.62569142297677	-1.26871231651346	Down	2.67106e-13	1.70345070151406e-12	COL15A1	3	GO:0005581//collagen;GO:0031224//intrinsic to membrane	GO:0005198//structural molecule activity	GO:0009987//cellular process;GO:0023052//signaling;GO:0032501//multicellular organismal process;GO:0032502//developmental process	gi|116008152|ref|NP_001846.3|/0/collagen alpha-1(XV) chain precursor [Homo sapiens]
6615	1722	417	135	7.66951007911516	3.19325481354676	-1.26410674184114	Down	5.06186e-21	4.91219776522216e-20	SNAI1	3	GO:0043231//intracellular membrane-bounded organelle	GO:0003677//DNA binding;GO:0019899//enzyme binding;GO:0046914//transition metal ion binding	GO:0001503//ossification;GO:0001704//formation of primary germ layer;GO:0001837//epithelial to mesenchymal transition;GO:0001942//hair follicle development;GO:0006357//regulation of transcription from RNA polymerase II promoter;GO:0016477//cell migration;GO:0045596//negative regulation of cell differentiation;GO:0051726//regulation of cell cycle;GO:0060706//cell differentiation involved in embryo…	gi|4325322|gb|AAD17332.1|/1.21025e-138/zinc finger protein [Homo sapiens]
8989	5190	185	60	1.12893538390269	0.470887158118391	-1.26150963035511	Down	4.35038e-10	2.22692628993056e-09	TRPA1	2	GO:0016021//integral to membrane;GO:0043232	GO:0005261//cation channel activity	GO:0000302//response to reactive oxygen species;GO:0033555//multicellular organismal response to stress;GO:0050907//detection of chemical stimulus involved in sensory perception;GO:0050951//sensory perception of temperature stimulus;GO:0050974//detection of mechanical stimulus involved in sensory perception;GO:0070838//divalent metal ion transport	gi|116534990|ref|NP_015628.2|/0/transient receptor potential cation channel subfamily A member 1 [Homo sapiens]
8497	5055	151	49	0.946063967718018	0.394827936633987	-1.26071366065718	Down	1.802578e-08	8.08145144399392e-08	PPFIA4	1	GO:0044424//intracellular part	GO:0005488//binding	GO:0009987//cellular process	gi|220675603|emb|CAH72276.2|/0/protein tyrosine phosphatase, receptor type, f polypeptide (PTPRF), interacting protein (liprin), alpha 4 [Homo sapiens]
55088	6277	387	126	1.95264615703841	0.817619744516863	-1.25592859809181	Down	1.94504e-19	1.73962096258847e-18	C10orf118	2	-	-	-	gi|72679899|gb|AAI00671.1|/0/C10orf118 protein, partial [Homo sapiens]
50509	6192	92	30	0.470567137287743	0.197343697564151	-1.25369012589581	Down	1.298768e-05	4.34256372859573e-05	COL5A3	3	-	-	-	gi|296232847|ref|XP_002807839.1|/0/PREDICTED: LOW QUALITY PROTEIN: collagen alpha-3(V) chain [Callithrix jacchus]
100131755	7952	144	47	0.57352299507417	0.240743428235704	-1.25235491521199	Down	4.5469e-08	1.97299994849154e-07	ARMCX4	1	GO:0031224//intrinsic to membrane	-	-	gi|119623273|gb|EAX02868.1|/0/armadillo repeat containing, X-linked 4, isoform CRA_a [Homo sapiens]//gi|119623273|gb|EAX02868.1|/1.26352e-16/armadillo repeat containing, X-linked 4, isoform CRA_a [Homo sapiens]//gi|119623274|gb|EAX02869.1|/0/armadillo repeat containing, X-linked 4, isoform CRA_b [Homo sapiens]//gi|148688436|gb|EDL20383.1|/1.8377e-20/mCG58635 [Mus musculus]//gi|84027758|sp|Q5H9R4.…
11077	1916	147	48	2.42988961361191	1.02041935308328	-1.25172860956252	Down	3.32616e-08	1.46012646550868e-07	HSF2BP	1	GO:0044444//cytoplasmic part	-	GO:0006351//transcription, DNA-dependent;GO:0048232//male gamete generation;GO:0050896//response to stimulus	gi|5901980|ref|NP_008962.1|/6.36424e-160/heat shock factor 2-binding protein [Homo sapiens]
7268	2395	101	33	1.3356127944207	0.561230644195803	-1.25083612884066	Down	5.01506e-06	1.76630353294844e-05	TTC4	4	-	-	-	gi|156627581|ref|NP_004614.3|/0/tetratricopeptide repeat protein 4 [Homo sapiens]
100131827	3068	67	22	0.691646465774837	0.2920789641132	-1.24367633726779	Down	0.000228136	0.000652855706243934	ZNF717	1	-	-	-	gi|190014599|ref|NP_001121695.1|/0/zinc finger protein 717 [Homo sapiens]
114987	2508	137	45	1.73004639427632	0.730832640739968	-1.24319775207816	Down	1.14704e-07	4.78817476168004e-07	WDR31	2	-	-	-	gi|21687048|ref|NP_660284.1|/0/WD repeat-containing protein 31 isoform 3 [Homo sapiens]//gi|59938780|ref|NP_001012361.1|/0/WD repeat-containing protein 31 isoform 1 [Homo sapiens]
147372	6276	694	228	3.50220247176178	1.47973813454604	-1.24292060386082	Down	4.10334e-33	5.99935437520661e-32	CCBE1	3	-	-	GO:0001525//angiogenesis;GO:0001945//lymph vessel development	gi|18916890|dbj|BAB85569.1|/0/KIAA1983 protein [Homo sapiens]
3237	1463	73	24	1.58031349466742	0.668189842962256	-1.24188082360617	Down	0.0001197382	0.00035715536944866	HOXD11	2	-	-	GO:0001822//kidney development;GO:0002062//chondrocyte differentiation;GO:0003002//regionalization;GO:0003156//regulation of organ formation;GO:0006351//transcription, DNA-dependent;GO:0030326//embryonic limb morphogenesis;GO:0040007//growth;GO:0045597//positive regulation of cell differentiation;GO:0048754//branching morphogenesis of an epithelial tube	gi|23510368|ref|NP_067015.2|/2.76229e-117/homeobox protein Hox-D11 [Homo sapiens]
7130	1439	225	74	4.95206616664111	2.09461341147729	-1.2413465910354	Down	1.028852e-11	5.91723690897269e-11	TNFAIP6	3	-	GO:0005539//glycosaminoglycan binding	GO:0006952//defense response;GO:0007154//cell communication;GO:0023052//signaling	gi|26051243|ref|NP_009046.2|/9.5525e-155/tumor necrosis factor-inducible gene 6 protein precursor [Homo sapiens]
25758	11640	918	302	2.49778133267096	1.05678567281158	-1.24096436953603	Down	3.61564e-43	6.89270336637931e-42	C11orf41	2	GO:0031224//intrinsic to membrane	-	-	gi|302129637|ref|NP_036326.2|/0/UPF0606 protein C11orf41 [Homo sapiens]
55252	7174	893	294	3.94234657864531	1.66924049597279	-1.23986278573217	Down	5.54446e-42	1.02924493032529e-40	ASXL2	4	-	-	-	gi|58257705|dbj|BAB21776.2|/0/KIAA1685 protein [Homo sapiens]
57683	10146	748	247	2.33491703963021	0.99159664663695	-1.23554599375027	Down	2.98746e-35	4.66059566666667e-34	ZDBF2	1	-	GO:0046914//transition metal ion binding	-	gi|151301098|ref|NP_065974.1|/0/DBF4-type zinc finger-containing protein 2 [Homo sapiens]
9590	8450	24462	8082	91.6853542963269	38.9578598852616	-1.23477687147356	Down	0	0	AKAP12	3	GO:0016020//membrane;GO:0043232;GO:0044444//cytoplasmic part	GO:0019899//enzyme binding	GO:0006171//cAMP biosynthetic process;GO:0006886//intracellular protein transport;GO:0007166//cell surface receptor signaling pathway;GO:0010737//protein kinase A signaling cascade	gi|21493024|ref|NP_653080.1|/0/A-kinase anchor protein 12 isoform 2 [Homo sapiens]//gi|68533061|dbj|BAE06085.1|/0/AKAP12 variant protein [Homo sapiens]
26207	6383	1005	333	4.98661606688986	2.12496774965082	-1.23062018444234	Down	1.637714e-46	3.36501723275261e-45	PITPNC1	2	GO:0043231//intracellular membrane-bounded organelle	GO:0005488//binding;GO:0005548//phospholipid transporter activity	GO:0006650//glycerophospholipid metabolic process;GO:0010876//lipid localization;GO:0023052//signaling;GO:0051234//establishment of localization	gi|32307140|ref|NP_036549.2|/2.71888e-171/cytoplasmic phosphatidylinositol transfer protein 1 isoform a [Homo sapiens] //gi|32307142|ref|NP_858057.1|/1.08902e-159/cytoplasmic phosphatidylinositol transfer protein 1 isoform b [Homo sapiens]
23201	1834	412	137	7.11479841047906	3.04266535838713	-1.22548720967	Down	6.96378e-20	6.36015652968508e-19	FAM168A	1	-	-	-	gi|1665823|dbj|BAA13408.1|/1.60656e-112/KIAA0280 [Homo sapiens]
388121	2292	255	85	3.52362986138864	1.51055751748057	-1.22198126616847	Down	8.27442e-13	5.11827846923077e-12	TNFAIP8L3	2	-	-	-	gi|59709436|ref|NP_997264.2|/2.89713e-154/tumor necrosis factor alpha-induced protein 8-like protein 3 [Homo sapiens]
55584	2292	186	62	2.57017707536583	1.10181842451524	-1.22198126616847	Down	1.029394e-09	5.11114489306764e-09	CHRNA9	3	GO:0005887//integral to plasma membrane	GO:0004871//signal transducer activity;GO:0005231//excitatory extracellular ligand-gated ion channel activity;GO:0005261//cation channel activity	GO:0006811//ion transport;GO:0007267//cell-cell signaling;GO:0042471//ear morphogenesis;GO:0050877//neurological system process;GO:0051480//cytosolic calcium ion homeostasis	gi|70995130|ref|NP_060051.2|/0/neuronal acetylcholine receptor subunit alpha-9 precursor [Homo sapiens]
57710	4155	78	26	0.594549871026749	0.254879715669859	-1.22198126616846	Down	8.52124e-05	0.000258974844253565	KIAA1614	1	-	-	-	gi|10047303|dbj|BAB13440.1|/0/KIAA1614 protein [Homo sapiens]
84627	13203	1267	423	3.03926596207268	1.30497051215427	-1.21970572146818	Down	2.06774e-57	5.21088152991453e-56	ZNF469	1	GO:0043231//intracellular membrane-bounded organelle	GO:0003676//nucleic acid binding;GO:0046914//transition metal ion binding	-	gi|188536004|ref|NP_001120936.1|/0/zinc finger protein 469 [Homo sapiens]
388	2384	8445	2822	112.191025429739	48.215171123395	-1.2183982005388	Down	0	0	RHOB	2	GO:0005626//insoluble fraction;GO:0005770//late endosome;GO:0031090//organelle membrane	GO:0017111//nucleoside-triphosphatase activity;GO:0032561//guanyl ribonucleotide binding	GO:0001775//cell activation;GO:0006915//apoptotic process;GO:0006935//chemotaxis;GO:0007041//lysosomal transport;GO:0007265//Ras protein signal transduction;GO:0007599//hemostasis;GO:0009207;GO:0009966//regulation of signal transduction;GO:0045765//regulation of angiogenesis;GO:0048869//cellular developmental process;GO:0051726//regulation of cell cycle	gi|4757764|ref|NP_004031.1|/6.00467e-110/rho-related GTP-binding protein RhoB precursor [Homo sapiens]
3755	2237	776	260	10.986527619145	4.73413150920099	-1.21456379460599	Down	1.366286e-35	2.14281610159574e-34	KCNG1	3	GO:0005887//integral to plasma membrane	GO:0005267//potassium channel activity	GO:0030001//metal ion transport;GO:0034220//ion transmembrane transport	gi|27436988|ref|NP_002228.2|/0/potassium voltage-gated channel subfamily G member 1 [Homo sapiens]
116987	10868	2395	805	6.9794403946521	3.01702705536243	-1.20998373306888	Down	1.3032e-105	5.88135489795918e-104	AGAP1	1	GO:0044424//intracellular part	GO:0005083//small GTPase regulator activity;GO:0008047//enzyme activator activity;GO:0032561//guanyl ribonucleotide binding;GO:0046914//transition metal ion binding	GO:0006810//transport;GO:0032012//regulation of ARF protein signal transduction;GO:0043087//regulation of GTPase activity	gi|349585207|ref|NP_001231817.1|/0/arf-GAP with GTPase, ANK repeat and PH domain-containing protein 1 isoform 3 [Homo sapiens]//gi|40789044|dbj|BAA83051.2|/0/KIAA1099 protein [Homo sapiens]//gi|80978930|ref|NP_001032208.1|/0/arf-GAP with GTPase, ANK repeat and PH domain-containing protein 1 isoform 1 [Homo sapiens]
10114	4743	824	277	5.50223077580375	2.3788091402268	-1.20977712658134	Down	1.809048e-37	3.01354690847458e-36	HIPK3	1	GO:0043231//intracellular membrane-bounded organelle	GO:0004672//protein kinase activity;GO:0032559	GO:0043066//negative regulation of apoptotic process;GO:0043407//negative regulation of MAP kinase activity	gi|114796624|ref|NP_005725.3|/0/homeodomain-interacting protein kinase 3 isoform 1 [Homo sapiens]//gi|114796630|ref|NP_001041665.1|/0/homeodomain-interacting protein kinase 3 isoform 2 [Homo sapiens]
648	3435	116	39	1.06953736736264	0.462456427339853	-1.20959754171263	Down	1.841726e-06	6.79782488337158e-06	BMI1	8	GO:0043234//protein complex;GO:0044451//nucleoplasm part	GO:0019787//small conjugating protein ligase activity;GO:0019904//protein domain specific binding;GO:0046914//transition metal ion binding	GO:0001501//skeletal system development;GO:0006357//regulation of transcription from RNA polymerase II promoter;GO:0006915//apoptotic process;GO:0006955//immune response;GO:0007417//central nervous system development;GO:0008284//positive regulation of cell proliferation;GO:0009952//anterior/posterior pattern specification;GO:0016570//histone modification;GO:0017145//stem cell division;GO:0031398/…	gi|323276616|ref|NP_001190991.1|/2.67986e-178/COMMD3-BMI1 read-through protein [Homo sapiens]
3949	5292	7549	2545	45.1787597555642	19.5884875672861	-1.2056386554924	Down	0	0	LDLR	1	GO:0000323//lytic vacuole;GO:0005768//endosome;GO:0009986//cell surface;GO:0016021//integral to membrane;GO:0030665//clathrin-coated vesicle membrane;GO:0034358//plasma lipoprotein particle;GO:0044459//plasma membrane part	GO:0030169//low-density lipoprotein particle binding;GO:0030228//lipoprotein particle receptor activity;GO:0046872//metal ion binding	GO:0006897//endocytosis;GO:0008202//steroid metabolic process;GO:0009725//response to hormone stimulus;GO:0016125//sterol metabolic process;GO:0030301//cholesterol transport;GO:0032502//developmental process;GO:0034381//plasma lipoprotein particle clearance;GO:0042157//lipoprotein metabolic process;GO:0043434//response to peptide hormone stimulus;GO:0043627//response to estrogen stimulus;GO:00517…	gi|307775414|ref|NP_001182728.1|/0/low-density lipoprotein receptor isoform 3 precursor [Homo sapiens] //gi|307775416|ref|NP_001182729.1|/0/low-density lipoprotein receptor isoform 4 precursor [Homo sapiens] //gi|307775420|ref|NP_001182731.1|/0/low-density lipoprotein receptor isoform 5 precursor [Homo sapiens]//gi|307775422|ref|NP_001182732.1|/0/low-density lipoprotein receptor isoform 6 precurs…
254225	7840	501	169	2.02388754541501	0.878018357264503	-1.20480612236034	Down	2.89386e-23	3.04371446254459e-22	RNF169	1	-	GO:0046914//transition metal ion binding	-	gi|148839382|ref|NP_001092108.1|/0/E3 ubiquitin-protein ligase RNF169 [Homo sapiens]
9720	5828	74	25	0.402139646016126	0.174724344445954	-1.20261594130154	Down	0.000158468	0.00046538137250996	CCDC144A	1	-	-	-	gi|149363642|ref|NP_055510.1|/0/coiled-coil domain-containing protein 144A [Homo sapiens]
58499	8306	292	99	1.11341133768285	0.485485453713803	-1.19748670424772	Down	4.67604e-14	3.1263727755102e-13	ZNF462	4	GO:0043231//intracellular membrane-bounded organelle	GO:0046914//transition metal ion binding	GO:0006357//regulation of transcription from RNA polymerase II promoter;GO:0051100//negative regulation of binding	gi|114431236|ref|NP_067047.4|/0/zinc finger protein 462 [Homo sapiens]
57224	7491	336	114	1.42057509001062	0.61986627502409	-1.19644617406133	Down	6.14952e-16	4.59810474725275e-15	NHSL1	1	-	-	-	gi|221139926|ref|NP_001137532.1|/0/NHS-like protein 1 isoform 2 [Homo sapiens]//gi|254692997|ref|NP_065197.1|/0/NHS-like protein 1 isoform 1 [Homo sapiens]
56137	5360	162	55	0.957226998868195	0.417956278870942	-1.19550905480727	Down	2.18498e-08	9.73664513350126e-08	PCDHA12	2	GO:0016021//integral to membrane;GO:0031224//intrinsic to membrane	GO:0046872//metal ion binding	GO:0016337//cell-cell adhesion;GO:0048731	gi|119582391|gb|EAW61987.1|/0/hCG1982192, isoform CRA_b [Homo sapiens]//gi|119582415|gb|EAW62011.1|/0/hCG1982192, isoform CRA_z [Homo sapiens]
344148	7611	409	139	1.70194805439075	0.743885395563852	-1.19403472566556	Down	5.04138e-19	4.41520067227723e-18	NCKAP5	3	-	GO:0005488//binding	-	gi|126362967|ref|NP_997246.2|/0/nck-associated protein 5 isoform 1 [Homo sapiens]//gi|126362969|ref|NP_997364.3|/0/nck-associated protein 5 isoform 2 [Homo sapiens]
283208	2272	3068	1043	42.7672911187947	18.6985932930732	-1.19357809043048	Down	6.1303e-132	3.34725732407407e-130	P4HA3	3	GO:0044432//endoplasmic reticulum part	GO:0016701//oxidoreductase activity, acting on single donors with incorporation of molecular oxygen;GO:0019798;GO:0019842//vitamin binding;GO:0046914//transition metal ion binding	GO:0008152//metabolic process	gi|194373965|dbj|BAG62295.1|/0/unnamed protein product [Homo sapiens]
22979	7500	2166	737	9.14664668508643	4.00257223648354	-1.19231548396057	Down	1.49836e-93	5.93008652348993e-92	EFR3B	1	-	-	-	gi|190684710|ref|NP_055786.1|/0/protein EFR3 homolog B [Homo sapiens]
55640	3669	863	294	7.44951156355826	3.26386789809453	-1.1905631697899	Down	3.10374e-38	5.27456910086455e-37	FLVCR2	1	GO:0031224//intrinsic to membrane	GO:0004871//signal transducer activity;GO:0005506//iron ion binding;GO:0051184	GO:0051181//cofactor transport	gi|190341091|ref|NP_060261.2|/0/feline leukemia virus subgroup C receptor-related protein 2 isoform 1 [Homo sapiens]//gi|305632820|ref|NP_001182212.1|/2.98277e-156/feline leukemia virus subgroup C receptor-related protein 2 isoform 2 [Homo sapiens]
5013	2872	217	74	2.3929852017856	1.04949467239409	-1.18911663226284	Down	1.057744e-10	5.67046942545455e-10	OTX1	1	GO:0043231//intracellular membrane-bounded organelle	GO:0001071//nucleic acid binding transcription factor activity;GO:0003677//DNA binding	GO:0003002//regionalization;GO:0006355//regulation of transcription, DNA-dependent;GO:0007420//brain development;GO:0042471//ear morphogenesis	gi|149044776|gb|EDL97962.1|/2.77933e-64/orthodenticle homolog 1 (Drosophila), isoform CRA_a [Rattus norvegicus]
2004	2180	1026	351	14.9058100251891	6.5581836932163	-1.1845065607498	Down	8.57472e-45	1.6930287e-43	ELK3	2	GO:0031981//nuclear lumen	GO:0003712//transcription cofactor activity;GO:0043565//sequence-specific DNA binding	GO:0009987//cellular process;GO:0010467//gene expression;GO:0023052//signaling	gi|44955921|ref|NP_005221.2|/2.17092e-151/ETS domain-containing protein Elk-3 [Homo sapiens]
22941	10641	1352	463	4.0240091825342	1.77227659421695	-1.18302981846925	Down	2.28002e-58	5.88844289343066e-57	SHANK2	3	GO:0030427//site of polarized growth;GO:0044297//cell body;GO:0044430//cytoskeletal part;GO:0044459//plasma membrane part	GO:0019904//protein domain specific binding;GO:0030159//receptor signaling complex scaffold activity;GO:0035254//glutamate receptor binding	GO:0007165//signal transduction;GO:0007417//central nervous system development	gi|226817313|ref|NP_036441.2|/0/SH3 and multiple ankyrin repeat domains protein 2 isoform 1 [Homo sapiens]//gi|254911082|ref|NP_573573.2|/0/SH3 and multiple ankyrin repeat domains protein 2 isoform 2 [Homo sapiens]
84448	3774	73	25	0.61261225296726	0.269818092059094	-1.1829871345526	Down	0.00021311	0.000613627768554688	ABLIM2	1	GO:0005856//cytoskeleton;GO:0031981//nuclear lumen;GO:0043292//contractile fiber	GO:0008092//cytoskeletal protein binding;GO:0046914//transition metal ion binding	GO:0006357//regulation of transcription from RNA polymerase II promoter;GO:0006935//chemotaxis;GO:0006996//organelle organization	gi|153792514|ref|NP_115808.3|/0/actin-binding LIM protein 2 isoform 6 [Homo sapiens]//gi|194272196|ref|NP_001123555.1|/0/actin-binding LIM protein 2 isoform 1 [Homo sapiens]//gi|194272198|ref|NP_001123556.1|/0/actin-binding LIM protein 2 isoform 2 [Homo sapiens]//gi|194272200|ref|NP_001123557.1|/0/actin-binding LIM protein 2 isoform 3 [Homo sapiens]//gi|194272202|ref|NP_001123558.1|/0/actin-bindi…
151987	1495	1135	391	24.0447011450289	10.6529164002015	-1.17447055031823	Down	9.76872e-49	2.11528060611995e-47	PPP4R2	2	GO:0005815//microtubule organizing center;GO:0031981//nuclear lumen	GO:0005488//binding	GO:0006396//RNA processing;GO:0043412//macromolecule modification	gi|110781220|emb|CAB93534.2|/0/protein phosphatase 4 regulatory subunit 2 [Homo sapiens]
26278	15639	2383	821	4.82591621188545	2.13829259316547	-1.17434358985978	Down	2.36854e-100	1.00725579663462e-98	SACS	4	GO:0043005//neuron projection;GO:0043231//intracellular membrane-bounded organelle	GO:0031072//heat shock protein binding;GO:0032403//protein complex binding;GO:0032559	GO:0044267//cellular protein metabolic process;GO:0048523//negative regulation of cellular process	gi|163659918|ref|NP_055178.3|/0/sacsin [Homo sapiens]
2342	2836	116	40	1.29543753769065	0.574495616040069	-1.17307166568752	Down	3.2195e-06	1.16213373801265e-05	FNTB	3	GO:0015630//microtubule cytoskeleton;GO:0032991//macromolecular complex	GO:0008289//lipid binding;GO:0008318//protein prenyltransferase activity;GO:0046914//transition metal ion binding	GO:0008284//positive regulation of cell proliferation;GO:0009611//response to wounding;GO:0010033//response to organic substance;GO:0010557//positive regulation of macromolecule biosynthetic process;GO:0018342//protein prenylation;GO:0051726//regulation of cell cycle	gi|149051499|gb|EDM03672.1|/0/rCG62367, isoform CRA_b [Rattus norvegicus]
100286844	3109	81	28	0.825142604363706	0.366834576057492	-1.16951384627433	Down	0.000108957	0.00032725947147708	BCDIN3D-AS1	1	-	GO:0016741	GO:0006730//one-carbon metabolic process	gi|119578504|gb|EAW58100.1|/4.36011e-34/hCG1999069 [Homo sapiens]//gi|32171233|ref|NP_859059.1|/3.30404e-111/probable methyltransferase BCDIN3D [Homo sapiens]//gi|32171233|ref|NP_859059.1|/3.30774e-111/probable methyltransferase BCDIN3D [Homo sapiens]
781	3822	653	226	5.41112059841753	2.40852251545171	-1.16777898457855	Down	1.704232e-28	2.16903369151079e-27	CACNA2D1	2	GO:0005783//endoplasmic reticulum;GO:0034704//calcium channel complex;GO:0042383//sarcolemma	GO:0005262//calcium channel activity;GO:0043169//cation binding	GO:0006816//calcium ion transport;GO:0010959//regulation of metal ion transport;GO:0032412//regulation of ion transmembrane transporter activity	gi|54112390|ref|NP_000713.2|/0/voltage-dependent calcium channel subunit alpha-2/delta-1 precursor [Homo sapiens]
5576	2381	383	133	5.09452963905751	2.27522944585176	-1.16293691187108	Down	3.05178e-17	2.44294298552036e-16	PRKAR2A	2	GO:0005626//insoluble fraction;GO:0042383//sarcolemma;GO:0043234//protein complex;GO:0044444//cytoplasmic part	GO:0016208//AMP binding;GO:0016772//transferase activity, transferring phosphorus-containing groups;GO:0019887//protein kinase regulator activity;GO:0042802//identical protein binding;GO:0051018//protein kinase A binding	GO:0007169//transmembrane receptor protein tyrosine kinase signaling pathway;GO:0007599//hemostasis;GO:0010863//positive regulation of phospholipase C activity;GO:0015980//energy derivation by oxidation of organic compounds;GO:0030073//insulin secretion;GO:0032147//activation of protein kinase activity;GO:0033762//response to glucagon stimulus;GO:0042044//fluid transport;GO:0051259//protein oligo…	gi|4758958|ref|NP_004148.1|/0/cAMP-dependent protein kinase type II-alpha regulatory subunit [Homo sapiens]
4124	5128	1110	386	6.85550855201438	3.06600064789684	-1.1609056894167	Down	7.27954e-47	1.50798995480094e-45	MAN2A1	2	GO:0012505//endomembrane system;GO:0031224//intrinsic to membrane;GO:0043231//intracellular membrane-bounded organelle	GO:0015924;GO:0046914//transition metal ion binding	GO:0006487//protein N-linked glycosylation;GO:0006996//organelle organization;GO:0019318//hexose metabolic process;GO:0043009//chordate embryonic development;GO:0048513//organ development	gi|51477714|ref|NP_002363.2|/0/alpha-mannosidase 2 [Homo sapiens]
580	2610	163	57	1.97793407211382	0.889543729158134	-1.15285690551365	Down	4.89088e-08	2.11654985518591e-07	BARD1	2	GO:0000152//nuclear ubiquitin ligase complex	GO:0003676//nucleic acid binding;GO:0019787//small conjugating protein ligase activity;GO:0019899//enzyme binding;GO:0042802//identical protein binding;GO:0046914//transition metal ion binding;GO:0046983//protein dimerization activity	GO:0000209//protein polyubiquitination;GO:0006259//DNA metabolic process;GO:0006915//apoptotic process;GO:0009896;GO:0016310//phosphorylation;GO:0022402//cell cycle process;GO:0031124//mRNA 3'-end processing;GO:0033554//cellular response to stress;GO:0046823;GO:0048232//male gamete generation;GO:0048871//multicellular organismal homeostasis	gi|157266328|ref|NP_000456.2|/0/BRCA1-associated RING domain protein 1 [Homo sapiens]
65059	9615	852	298	2.80643521264444	1.26240855692333	-1.15255986521098	Down	5.75828e-36	9.11994015040286e-35	RAPH1	1	GO:0016020//membrane;GO:0031252//cell leading edge;GO:0042995//cell projection;GO:0043231//intracellular membrane-bounded organelle;GO:0043232	-	GO:0023052//signaling;GO:0031589//cell-substrate adhesion	gi|119590751|gb|EAW70345.1|/0/Ras association (RalGDS/AF-6) and pleckstrin homology domains 1, isoform CRA_b [Homo sapiens]//gi|47132519|ref|NP_998754.1|/0/ras-associated and pleckstrin homology domains-containing protein 1 isoform 1 [Homo sapiens]
53358	9768	160	56	0.518775008739399	0.233515294218416	-1.15159193827707	Down	6.67984e-08	2.8537321767689e-07	SHC3	5	GO:0044444//cytoplasmic part	GO:0005515//protein binding;GO:0060089	GO:0007169//transmembrane receptor protein tyrosine kinase signaling pathway;GO:0007264//small GTPase mediated signal transduction;GO:0007270//neuron-neuron synaptic transmission;GO:0007399//nervous system development;GO:0007610//behavior	gi|224586793|ref|NP_058544.3|/0/SHC-transforming protein 3 [Homo sapiens]
7070	2413	348	122	4.56758498577373	2.0593751262426	-1.14922492373315	Down	1.556484e-15	1.13878240049628e-14	THY1	3	GO:0009986//cell surface;GO:0016021//integral to membrane;GO:0030427//site of polarized growth;GO:0043005//neuron projection;GO:0043231//intracellular membrane-bounded organelle;GO:0044444//cytoplasmic part;GO:0046658//anchored to plasma membrane	GO:0005099//Ras GTPase activator activity;GO:0005102//receptor binding;GO:0019900//kinase binding;GO:0035091//phosphatidylinositol binding	GO:0006996//organelle organization;GO:0007044//cell-substrate junction assembly;GO:0007155//cell adhesion;GO:0010524//positive regulation of calcium ion transport into cytosol;GO:0016477//cell migration;GO:0031345//negative regulation of cell projection organization;GO:0033673//negative regulation of kinase activity;GO:0042462//eye photoreceptor cell development;GO:0043087//regulation of GTPase a…	gi|19923362|ref|NP_006279.2|/1.124e-71/thy-1 membrane glycoprotein preproprotein [Homo sapiens]
2081	4005	273	96	2.15886179760462	0.976341313611766	-1.14481340564601	Down	1.991376e-12	1.20278022587914e-11	ERN1	3	GO:0019866//organelle inner membrane;GO:0031227//intrinsic to endoplasmic reticulum membrane	GO:0004521//endoribonuclease activity;GO:0004672//protein kinase activity;GO:0032559;GO:0046872//metal ion binding	GO:0006396//RNA processing;GO:0006468//protein phosphorylation;GO:0012502//induction of programmed cell death;GO:0022402//cell cycle process;GO:0030968//endoplasmic reticulum unfolded protein response	gi|62089324|dbj|BAD93106.1|/0/endoplasmic reticulum to nucleus signalling 1 isoform 1 variant [Homo sapiens]
10391	3623	199	70	1.73960023252126	0.786978123766729	-1.144360369046	Down	2.00038e-09	9.70351592541815e-09	CORO2B	4	GO:0005856//cytoskeleton	GO:0003779//actin binding	GO:0007010//cytoskeleton organization	gi|148529011|ref|NP_006082.3|/0/coronin-2B isoform 1 [Homo sapiens]
9392	2978	685	241	7.28501738892716	3.29628916780223	-1.14408960706524	Down	6.5115e-29	8.44537730938416e-28	TGFBRAP1	1	GO:0044424//intracellular part	GO:0005126//cytokine receptor binding;GO:0030695//GTPase regulator activity	GO:0007178//transmembrane receptor protein serine/threonine kinase signaling pathway;GO:0019222//regulation of metabolic process	gi|21359865|ref|NP_004248.2|/0/transforming growth factor-beta receptor-associated protein 1 [Homo sapiens]
3236	1814	159	56	2.77603256399278	1.25742965486521	-1.14254679867406	Down	8.85074e-08	3.73963318223071e-07	HOXD10	3	GO:0043231//intracellular membrane-bounded organelle	GO:0001071//nucleic acid binding transcription factor activity;GO:0003677//DNA binding	GO:0003002//regionalization;GO:0006357//regulation of transcription from RNA polymerase II promoter;GO:0007626//locomotory behavior;GO:0014706//striated muscle tissue development;GO:0021522//spinal cord motor neuron differentiation;GO:0035108//limb morphogenesis;GO:0048562//embryonic organ morphogenesis;GO:0048666//neuron development;GO:0050877//neurological system process	gi|23510366|ref|NP_002139.2|/0/homeobox protein Hox-D10 [Homo sapiens]
3188	2392	227	80	3.00558764312861	1.36226552432244	-1.14163915785086	Down	1.584652e-10	8.38590443673347e-10	HNRNPH2	2	GO:0005681//spliceosomal complex;GO:0005856//cytoskeleton;GO:0031981//nuclear lumen	GO:0008187//poly-pyrimidine tract binding	GO:0000377;GO:0010468//regulation of gene expression	gi|148688440|gb|EDL20387.1|/0/heterogeneous nuclear ribonucleoprotein H2, isoform CRA_b [Mus musculus]
220972	2604	417	147	5.07177279425357	2.29937237290876	-1.14124999405561	Down	3.88026e-18	3.25489234992888e-17	MARCH8	1	GO:0005764//lysosome;GO:0005769//early endosome;GO:0012506//vesicle membrane;GO:0031224//intrinsic to membrane	GO:0019787//small conjugating protein ligase activity;GO:0042287//MHC protein binding;GO:0046914//transition metal ion binding	GO:0002504//antigen processing and presentation of peptide or polysaccharide antigen via MHC class II;GO:0010558;GO:0032446//protein modification by small protein conjugation	gi|50539410|ref|NP_659458.2|/4.21931e-154/E3 ubiquitin-protein ligase MARCH8 [Homo sapiens]//gi|50539410|ref|NP_659458.2|/5.52874e-154/E3 ubiquitin-protein ligase MARCH8 [Homo sapiens]//gi|50539410|ref|NP_659458.2|/5.74529e-154/E3 ubiquitin-protein ligase MARCH8 [Homo sapiens]
727851	7299	102	36	0.442589924225388	0.200896370787871	-1.13951910597649	Down	2.01948e-05	6.6270860100167e-05	RGPD8	1	GO:0005635//nuclear envelope	GO:0017016//Ras GTPase binding	GO:0006810//transport	gi|256600210|ref|NP_001157935.1|/0/RANBP2-like and GRIP domain-containing protein 8 [Homo sapiens]
317	7204	970	343	4.26444723140395	1.93933738725619	-1.13679493634899	Down	7.1297e-40	1.25879763173653e-38	APAF1	1	GO:0031981//nuclear lumen;GO:0044444//cytoplasmic part	GO:0016505//apoptotic protease activator activity;GO:0032559	GO:0006917//induction of apoptosis;GO:0006919//activation of cysteine-type endopeptidase activity involved in apoptotic process;GO:0006950//response to stress;GO:0048731	gi|310942679|pdb|3IZA|A/0/Chain A, Structure Of An Apoptosome-Procaspase-9 Card Complex//gi|32483361|ref|NP_863658.1|/0/apoptotic protease-activating factor 1 isoform d [Homo sapiens]//gi|32483363|ref|NP_863659.1|/0/apoptotic protease-activating factor 1 isoform e [Homo sapiens]//gi|4502123|ref|NP_001151.1|/0/apoptotic protease-activating factor 1 isoform b [Homo sapiens]//gi|7108333|ref|NP_03736…
60529	5466	1714	607	9.9312955144508	4.52326485191826	-1.13461745330413	Down	6.265e-69	1.88814505962521e-67	ALX4	3	GO:0043231//intracellular membrane-bounded organelle;GO:0043234//protein complex	GO:0001071//nucleic acid binding transcription factor activity;GO:0003677//DNA binding;GO:0046983//protein dimerization activity	GO:0003002//regionalization;GO:0006357//regulation of transcription from RNA polymerase II promoter;GO:0006915//apoptotic process;GO:0008544//epidermis development;GO:0030326//embryonic limb morphogenesis;GO:0048562//embryonic organ morphogenesis	gi|14017793|dbj|BAB47417.1|/0/KIAA1788 protein [Homo sapiens]
83595	3219	96	34	0.944528291773802	0.430220295752156	-1.13451842491813	Down	3.80686e-05	0.000121127986079137	SOX7	2	GO:0043231//intracellular membrane-bounded organelle	GO:0000981//sequence-specific DNA binding RNA polymerase II transcription factor activity;GO:0043565//sequence-specific DNA binding	GO:0001704//formation of primary germ layer;GO:0006355//regulation of transcription, DNA-dependent;GO:0008283//cell proliferation;GO:0010952//positive regulation of peptidase activity;GO:0030111//regulation of Wnt receptor signaling pathway	gi|13899269|ref|NP_113627.1|/0/transcription factor SOX-7 [Homo sapiens]
3486	2638	16784	5945	201.504799293002	91.7930968190663	-1.13435663339156	Down	0	0	IGFBP3	4	GO:0000267//cell fraction;GO:0016942//insulin-like growth factor binding protein complex;GO:0043231//intracellular membrane-bounded organelle	GO:0005520//insulin-like growth factor binding;GO:0043169//cation binding;GO:0072542//protein phosphatase activator activity	GO:0001503//ossification;GO:0001932//regulation of protein phosphorylation;GO:0006915//apoptotic process;GO:0007165//signal transduction;GO:0008285//negative regulation of cell proliferation;GO:0014909//smooth muscle cell migration;GO:0016049//cell growth;GO:0045661//regulation of myoblast differentiation	gi|34534492|dbj|BAC87023.1|/1.9616e-149/unnamed protein product [Homo sapiens]//gi|34534492|dbj|BAC87023.1|/6.30146e-148/unnamed protein product [Homo sapiens]
83448	4379	262	93	1.89492079065713	0.865049496114044	-1.13128295587673	Down	8.72662e-12	5.04518413137255e-11	PUS7L	1	-	GO:0003676//nucleic acid binding;GO:0016866//intramolecular transferase activity	GO:0006399//tRNA metabolic process;GO:0009451//RNA modification	gi|119578270|gb|EAW57866.1|/0/pseudouridylate synthase 7 homolog (S. cerevisiae)-like [Homo sapiens]//gi|397510831|ref|XP_003825789.1|/0/PREDICTED: pseudouridylate synthase 7 homolog-like protein isoform 2 [Pan paniscus]
9644	11264	467	166	1.31307324843868	0.600272434607775	-1.12925807381005	Down	8.01694e-20	7.30317639237899e-19	SH3PXD2A	2	GO:0015629//actin cytoskeleton;GO:0044459//plasma membrane part	GO:0005543//phospholipid binding	GO:0009987//cellular process	gi|55749544|ref|NP_055446.2|/0/SH3 and PX domain-containing protein 2A [Homo sapiens]
26762	1841	1277	454	21.9685717762525	10.0446548541376	-1.12901308785912	Down	2.07304e-51	4.70181418461538e-50	HAVCR1	1	GO:0031224//intrinsic to membrane	GO:0004871//signal transducer activity	GO:0051704	gi|194390014|dbj|BAG60523.1|/3.70529e-90/unnamed protein product [Homo sapiens]//gi|194390014|dbj|BAG60523.1|/4.18873e-90/unnamed protein product [Homo sapiens]//gi|194390014|dbj|BAG60523.1|/5.46474e-90/unnamed protein product [Homo sapiens]
11037	5651	115	41	0.644521260415348	0.295523147454765	-1.1249568117736	Down	7.32178e-06	2.52888734830145e-05	STON1	1	GO:0030119//AP-type membrane coat adaptor complex	-	GO:0006897//endocytosis;GO:0015031//protein transport	gi|26787993|ref|NP_006864.2|/0/stonin-1 [Homo sapiens]
9369	6163	171	61	0.878756716288397	0.403153673505061	-1.12413394277032	Down	4.31062e-08	1.87276960756385e-07	NRXN3	1	GO:0016021//integral to membrane	GO:0004871//signal transducer activity;GO:0043169//cation binding	GO:0006935//chemotaxis;GO:0009987//cellular process	gi|157427673|ref|NP_001098720.1|/0/neurexin-3-beta isoform 3 precursor [Homo sapiens]//gi|40788347|dbj|BAA34463.2|/0/KIAA0743 protein [Homo sapiens]//gi|41350305|ref|NP_620426.2|/0/neurexin-3-beta isoform 2 precursor [Homo sapiens]
57082	7685	616	220	2.53864255024864	1.16603547416955	-1.12244559261755	Down	2.00404e-25	2.30067953536664e-24	CASC5	3	-	-	-	gi|74048514|ref|NP_733468.2|/0/protein CASC5 isoform 1 [Homo sapiens] //gi|74048554|ref|NP_653091.2|/0/protein CASC5 isoform 2 [Homo sapiens]
23233	2594	417	149	5.09132473255062	2.33964114780605	-1.12175381842981	Down	1.092474e-17	8.93112640203327e-17	EXOC6B	1	GO:0043234//protein complex	-	GO:0006887//exocytosis	gi|149363656|ref|NP_056004.1|/0/exocyst complex component 6B [Homo sapiens]
1755	7686	95	34	0.391460494006808	0.18018203643328	-1.11941153252792	Down	5.04836e-05	0.000158099728730749	DMBT1	2	GO:0030666//endocytic vesicle membrane;GO:0030667//secretory granule membrane;GO:0044425//membrane part	GO:0004888//transmembrane signaling receptor activity;GO:0019899//enzyme binding;GO:0051635//bacterial cell surface binding	GO:0002758//innate immune response-activating signal transduction;GO:0006810//transport;GO:0019731//antibacterial humoral response;GO:0030154//cell differentiation;GO:0032501//multicellular organismal process	gi|148539840|ref|NP_004397.2|/0/deleted in malignant brain tumors 1 protein isoform a precursor [Homo sapiens]//gi|148539842|ref|NP_015568.2|/0/deleted in malignant brain tumors 1 protein isoform b precursor [Homo sapiens]//gi|148539844|ref|NP_060049.2|/0/deleted in malignant brain tumors 1 protein isoform c precursor [Homo sapiens]
8867	7099	271	97	1.20902930988018	0.556554261190641	-1.11925496461405	Down	5.81802e-12	3.39916089233818e-11	SYNJ1	1	GO:0005624//membrane fraction;GO:0043234//protein complex;GO:0044424//intracellular part	GO:0003676//nucleic acid binding;GO:0019904//protein domain specific binding;GO:0034593//phosphatidylinositol bisphosphate phosphatase activity;GO:0046030//inositol trisphosphate phosphatase activity	GO:0006796//phosphate-containing compound metabolic process;GO:0007417//central nervous system development;GO:0007611//learning or memory;GO:0010033//response to organic substance;GO:0014013//regulation of gliogenesis;GO:0016079//synaptic vesicle exocytosis;GO:0033189//response to vitamin A;GO:0045807//positive regulation of endocytosis;GO:0046488//phosphatidylinositol metabolic process;GO:004848…	gi|237757310|ref|NP_003886.3|/0/synaptojanin-1 isoform a [Homo sapiens]//gi|237757326|ref|NP_001153778.1|/0/synaptojanin-1 isoform d [Homo sapiens]
3638	3020	4397	1575	46.1120295379889	21.2425460940908	-1.11818646938532	Down	6.16262e-170	4.29224056771653e-168	INSIG1	2	GO:0031090//organelle membrane;GO:0031224//intrinsic to membrane;GO:0043231//intracellular membrane-bounded organelle;GO:0044425//membrane part	GO:0005488//binding	GO:0006639//acylglycerol metabolic process;GO:0006694//steroid biosynthetic process;GO:0006950//response to stress;GO:0008203//cholesterol metabolic process;GO:0009890//negative regulation of biosynthetic process;GO:0031327;GO:0032868//response to insulin stimulus;GO:0032933//SREBP signaling pathway;GO:0033993//response to lipid;GO:0042471//ear morphogenesis;GO:0043627//response to estrogen stimu…	gi|241982794|ref|NP_938150.2|/4.71222e-79/insulin-induced gene 1 protein isoform 2 [Homo sapiens]//gi|38327531|ref|NP_938151.1|/1.06448e-57/insulin-induced gene 1 protein isoform 3 [Homo sapiens]//gi|51094470|gb|EAL23728.1|/9.60432e-128/insulin induced gene 1 [Homo sapiens]
5507	2576	491	176	6.03671048649778	2.78291385683012	-1.11716636112471	Down	1.951438e-20	1.82951190556439e-19	PPP1R3C	5	GO:0042598;GO:0044444//cytoplasmic part	GO:0004721//phosphoprotein phosphatase activity;GO:0005515//protein binding	GO:0005978//glycogen biosynthetic process;GO:0005980//glycogen catabolic process	gi|4885559|ref|NP_005389.1|/0/protein phosphatase 1 regulatory subunit 3C [Homo sapiens]
56134	6036	114	41	0.598164086866069	0.276673509984572	-1.11235677499397	Down	9.67854e-06	3.28895603419132e-05	PCDHAC2	5	GO:0016021//integral to membrane	GO:0004871//signal transducer activity;GO:0046872//metal ion binding	GO:0016337//cell-cell adhesion;GO:0048731	gi|14165431|ref|NP_114089.1|/0/protocadherin alpha-C2 isoform 2 precursor [Homo sapiens]//gi|9256600|ref|NP_061722.1|/0/protocadherin alpha-C2 isoform 1 precursor [Homo sapiens]
160760	3748	753	272	6.36297341395567	2.95598534050414	-1.1060619788689	Down	4.75188e-30	6.39281437870722e-29	PPTC7	1	GO:0043231//intracellular membrane-bounded organelle	GO:0016791//phosphatase activity;GO:0043169//cation binding	GO:0006796//phosphate-containing compound metabolic process	gi|21281679|ref|NP_644812.1|/2.50654e-161/protein phosphatase PTC7 homolog [Homo sapiens]
57338	3997	265	96	2.0997927908777	0.978295461850168	-1.10190481417672	Down	1.789402e-11	1.01073789214559e-10	JPH3	2	GO:0031224//intrinsic to membrane;GO:0033017//sarcoplasmic reticulum membrane;GO:0042598	GO:0005488//binding	GO:0007204//elevation of cytosolic calcium ion concentration;GO:0032412//regulation of ion transmembrane transporter activity	gi|21704283|ref|NP_065706.2|/0/junctophilin-3 [Homo sapiens]
196051	1521	375	136	7.80848478391033	3.64202270092358	-1.10030270958021	Down	1.299752e-15	9.54500316811955e-15	PPAPDC1A	1	GO:0031224//intrinsic to membrane	GO:0016791//phosphatase activity	GO:0006796//phosphate-containing compound metabolic process	gi|73611920|ref|NP_001025230.1|/3.18227e-156/phosphatidate phosphatase PPAPDC1A [Homo sapiens]
5098	4726	102	37	0.683551387414538	0.318890044341496	-1.09999074178986	Down	3.41314e-05	0.000109090984173442	PCDHGC3	1	GO:0005626//insoluble fraction;GO:0016021//integral to membrane;GO:0030054//cell junction;GO:0031224//intrinsic to membrane	GO:0046872//metal ion binding	GO:0016337//cell-cell adhesion;GO:0048232//male gamete generation	gi|14277675|ref|NP_002579.2|/0/protocadherin gamma-C3 isoform 1 precursor [Homo sapiens]//gi|14277677|ref|NP_115778.1|/0/protocadherin gamma-C3 isoform 2 precursor [Homo sapiens]//gi|14277679|ref|NP_115779.1|/6.5364e-61/protocadherin gamma-C3 isoform 3 [Homo sapiens]
2624	3484	234	85	2.12717110859599	0.99374220151133	-1.09799254889301	Down	3.0501e-10	1.58377807748753e-09	GATA2	1	GO:0031981//nuclear lumen	GO:0001071//nucleic acid binding transcription factor activity;GO:0003677//DNA binding;GO:0005515//protein binding;GO:0046872//metal ion binding;GO:0046914//transition metal ion binding	GO:0001701//in utero embryonic development;GO:0007399//nervous system development;GO:0007599//hemostasis;GO:0021536//diencephalon development;GO:0021700//developmental maturation;GO:0030154//cell differentiation;GO:0045165//cell fate commitment;GO:0045765//regulation of angiogenesis;GO:0045807//positive regulation of endocytosis;GO:0048513//organ development	gi|20070352|ref|NP_116027.2|/0/endothelial transcription factor GATA-2 isoform 1 [Homo sapiens]//gi|224611701|ref|NP_001139134.1|/0/endothelial transcription factor GATA-2 isoform 2 [Homo sapiens]
402415	2854	110	40	1.22068450286946	0.570872308020194	-1.09645038408461	Down	1.74831e-05	5.77794735849057e-05	XKRX	2	GO:0031224//intrinsic to membrane	-	-	gi|304376278|ref|NP_001182063.1|/0/XK-related protein 2 [Pan troglodytes]
286437	2328	110	40	1.49649208384426	0.69985806146462	-1.09645038408461	Down	1.74831e-05	5.77578939495798e-05	LOC286437	1	-	-	-	gi|2072958|gb|AAC51267.1|/6.03334e-107/putative p150 [Homo sapiens]
347918	1539	110	40	2.26369952643888	1.05865468946695	-1.09645038408461	Down	1.74831e-05	5.77686817519612e-05	EP400NL	2	-	-	-	gi|119618948|gb|EAW98542.1|/7.45937e-36/hCG2040558 [Homo sapiens]
554202	2166	1584	576	23.1612204178799	10.8317090332829	-1.09645038408461	Down	1.563224e-60	4.18381176762481e-59	MIR31HG	1	GO:0044421//extracellular region part	GO:0005102//receptor binding	GO:0006950//response to stress;GO:0022402//cell cycle process;GO:0051707//response to other organism	gi|332222529|ref|XP_003260422.1|/1.55099e-39/PREDICTED: interferon omega-1-like [Nomascus leucogenys]
2786	5123	1006	366	6.21925464947131	2.90997785260007	-1.09573351696879	Down	4.97424e-39	8.593679671875e-38	GNG4	1	GO:0031234//extrinsic to internal side of plasma membrane	GO:0060089	GO:0007186//G-protein coupled receptor signaling pathway;GO:0007267//cell-cell signaling;GO:0015980//energy derivation by oxidation of organic compounds;GO:0016049//cell growth;GO:0033762//response to glucagon stimulus	gi|4758450|ref|NP_004476.1|/4.09011e-34/guanine nucleotide-binding protein G(I)/G(S)/G(O) subunit gamma-4 precursor [Homo sapiens]//gi|4758450|ref|NP_004476.1|/4.19223e-34/guanine nucleotide-binding protein G(I)/G(S)/G(O) subunit gamma-4 precursor [Homo sapiens]//gi|4758450|ref|NP_004476.1|/4.30814e-34/guanine nucleotide-binding protein G(I)/G(S)/G(O) subunit gamma-4 precursor [Homo sapiens]
144100	4820	1046	381	6.87304774700895	3.21966652002672	-1.09403871420093	Down	2.03088e-40	3.65868615885947e-39	PLEKHA7	4	GO:0005815//microtubule organizing center;GO:0005913//cell-cell adherens junction	GO:0005515//protein binding	GO:0016337//cell-cell adhesion;GO:0045217//cell-cell junction maintenance	gi|239047795|ref|NP_778228.3|/0/pleckstrin homology domain-containing family A member 7 [Homo sapiens]
22824	3284	596	218	5.74788176400427	2.70387306353182	-1.08800296113255	Down	1.58345e-23	1.68346237680289e-22	HSPA4L	2	GO:0043231//intracellular membrane-bounded organelle	GO:0032559	GO:0006950//response to stress;GO:0044267//cellular protein metabolic process	gi|194381208|dbj|BAG64172.1|/0/unnamed protein product [Homo sapiens]
345643	2104	82	30	1.23433439698208	0.580775748724917	-1.08768017445687	Down	0.000238052	0.000679473690222652	MCIN	1	-	-	-	gi|299782571|ref|NP_001177716.1|/0/multicilin [Homo sapiens]
57537	6061	634	232	3.31291038702599	1.5591096335786	-1.08737680045914	Down	6.61746e-25	7.4471682480916e-24	SORCS2	2	GO:0031224//intrinsic to membrane	GO:0008528//G-protein coupled peptide receptor activity	GO:0007186//G-protein coupled receptor signaling pathway	gi|170014689|ref|NP_065828.2|/0/VPS10 domain-containing receptor SorCS2 precursor [Homo sapiens]
122786	5066	844	309	5.27645180720647	2.48442704417044	-1.08665492625012	Down	1.358148e-32	1.95978762381729e-31	FRMD6	3	GO:0016020//membrane;GO:0043231//intracellular membrane-bounded organelle;GO:0043232	-	-	gi|189055132|dbj|BAG38116.1|/0/unnamed protein product [Homo sapiens]//gi|193785189|dbj|BAG54342.1|/3.20096e-121/unnamed protein product [Homo sapiens]//gi|388490221|ref|NP_001253975.1|/0/FERM domain-containing protein 6 isoform 2 [Homo sapiens]
4162	3332	243	89	2.30975542343946	1.08797262508236	-1.0860978380867	Down	2.0045e-10	1.05321085536086e-09	MCAM	2	GO:0031224//intrinsic to membrane	-	GO:0009987//cellular process;GO:0032502//developmental process	gi|62089436|dbj|BAD93162.1|/0/Melanoma cell adhesion molecule variant [Homo sapiens]
272	4473	632	232	4.4748954677392	2.11262318111332	-1.08281851849684	Down	1.124222e-24	1.25322063024575e-23	AMPD3	1	GO:0044444//cytoplasmic part	GO:0016814//hydrolase activity, acting on carbon-nitrogen (but not peptide) bonds, in cyclic amidines;GO:0043169//cation binding	GO:0009112;GO:0009127//purine nucleoside monophosphate biosynthetic process;GO:0009169	gi|4502079|ref|NP_000471.1|/0/AMP deaminase 3 isoform 1A [Homo sapiens]//gi|70906428|ref|NP_001020561.1|/0/AMP deaminase 3 isoform 1C [Homo sapiens]
84129	3556	117	43	1.04205063868791	0.492537903436827	-1.08111873032862	Down	1.179314e-05	3.96262943475784e-05	ACAD11	4	GO:0042579//microbody	GO:0016627//oxidoreductase activity, acting on the CH-CH group of donors;GO:0016740//transferase activity;GO:0050662//coenzyme binding	GO:0008152//metabolic process	gi|38505218|ref|NP_115545.3|/0/acyl-CoA dehydrogenase family member 11 [Homo sapiens]
4811	5903	204	75	1.09451596033241	0.517513203166706	-1.08062541692292	Down	6.60138e-09	3.07571802949697e-08	NID1	2	GO:0005578//proteinaceous extracellular matrix;GO:0044464//cell part	GO:0046872//metal ion binding	GO:0006464//cellular protein modification process;GO:0031589//cell-substrate adhesion	gi|115298674|ref|NP_002499.2|/0/nidogen-1 precursor [Homo sapiens]
283209	8519	2215	815	8.23473877662187	3.89674462137003	-1.07945349977125	Down	6.83232e-82	2.39822565714286e-80	PGM2L1	3	GO:0044444//cytoplasmic part	GO:0016301//kinase activity;GO:0016868//intramolecular transferase activity, phosphotransferases	GO:0006006//glucose metabolic process;GO:0006796//phosphate-containing compound metabolic process	gi|31377548|ref|NP_775853.2|/0/glucose 1,6-bisphosphate synthase [Homo sapiens]
81567	3231	613	226	6.00880667155995	2.84907863016293	-1.07658306672291	Down	8.9758e-24	9.64121905282332e-23	TXNDC5	2	GO:0005764//lysosome;GO:0044432//endoplasmic reticulum part	GO:0015036//disulfide oxidoreductase activity	GO:0018904;GO:0019725//cellular homeostasis;GO:0043066//negative regulation of apoptotic process;GO:0048193//Golgi vesicle transport	gi|119575627|gb|EAW55223.1|/0/hCG2043289 [Homo sapiens]//gi|42794771|ref|NP_110437.2|/0/thioredoxin domain-containing protein 5 isoform 1 precursor [Homo sapiens]
161779	2318	103	38	1.40730589784497	0.667733429135096	-1.07559177918694	Down	4.31422e-05	0.000136096408737518	PGBD4	4	-	-	-	gi|25777746|ref|NP_689808.2|/0/piggyBac transposable element-derived protein 4 [Homo sapiens]
4864	4827	9671	3568	63.453970030271	30.1079025035002	-1.07556822504629	Down	0	0	NPC1	4	GO:0005764//lysosome;GO:0005770//late endosome;GO:0012505//endomembrane system;GO:0016021//integral to membrane	GO:0004888//transmembrane signaling receptor activity;GO:0005319//lipid transporter activity;GO:0005488//binding	GO:0007034//vacuolar transport;GO:0008202//steroid metabolic process;GO:0010038//response to metal ion;GO:0010507//negative regulation of autophagy;GO:0016192//vesicle-mediated transport;GO:0030301//cholesterol transport;GO:0055092//sterol homeostasis	gi|62087676|dbj|BAD92285.1|/0/Niemann-Pick disease, type C1 variant [Homo sapiens]
85352	6741	360	133	1.69138661060295	0.80363763693414	-1.07358942627579	Down	1.605196e-14	1.10324484988345e-13	KIAA1644	1	GO:0016020//membrane	-	-	gi|148672505|gb|EDL04452.1|/3.43792e-79/mCG141069 [Mus musculus]
2887	5040	2828	1047	17.7710702368754	8.46153391241492	-1.0705394433259	Down	1.10403e-102	4.79886848402948e-101	GRB10	2	GO:0016020//membrane;GO:0044444//cytoplasmic part	GO:0005102//receptor binding;GO:0030674//protein binding, bridging	GO:0005979//regulation of glycogen biosynthetic process;GO:0007169//transmembrane receptor protein tyrosine kinase signaling pathway;GO:0009967//positive regulation of signal transduction;GO:0009968//negative regulation of signal transduction;GO:0010829//negative regulation of glucose transport;GO:0016055//Wnt receptor signaling pathway;GO:0016310//phosphorylation;GO:0043434//response to peptide …	gi|48762679|ref|NP_005302.3|/0/growth factor receptor-bound protein 10 isoform a [Homo sapiens]//gi|48762693|ref|NP_001001549.1|/0/growth factor receptor-bound protein 10 isoform b [Homo sapiens]
2117	2002	224	83	3.54363236738912	1.68867849735814	-1.06933425615799	Down	1.64668e-09	8.04068889870273e-09	ETV3	1	GO:0043231//intracellular membrane-bounded organelle	GO:0001071//nucleic acid binding transcription factor activity;GO:0003677//DNA binding	GO:0006351//transcription, DNA-dependent	gi|223718207|ref|NP_001138784.1|/0/ETS translocation variant 3 isoform 1 [Homo sapiens]//gi|291992|gb|AAA60949.1|/2.49485e-86/ETS oncogene, partial [Homo sapiens]
284716	10583	102	38	0.305250293576595	0.146254000636412	-1.06151659397522	Down	5.65916e-05	0.000176136874665728	RIMKLA	3	GO:0044424//intracellular part	GO:0016879//ligase activity, forming carbon-nitrogen bonds;GO:0032559;GO:0043169//cation binding	GO:0043412//macromolecule modification	gi|164663810|ref|NP_775913.2|/0/N-acetylaspartyl-glutamate synthetase A [Homo sapiens]
10525	4622	7145	2664	48.9595036901548	23.4767099022435	-1.06035869435923	Down	1.582438e-252	1.62761108476744e-250	HYOU1	1	GO:0044432//endoplasmic reticulum part	GO:0032559	GO:0006950//response to stress	gi|5453832|ref|NP_006380.1|/0/hypoxia up-regulated protein 1 precursor [Homo sapiens]
83591	4840	118	44	0.772149439144164	0.370288537974917	-1.06023019617185	Down	1.481464e-05	4.92457339797069e-05	THAP2	3	GO:0031981//nuclear lumen	GO:0003676//nucleic acid binding;GO:0043169//cation binding	-	gi|13899259|ref|NP_113623.1|/3.83986e-117/THAP domain-containing protein 2 [Homo sapiens]
84078	3008	150	56	1.57934911653293	0.758303654895442	-1.05848253388559	Down	1.03769e-06	3.92343957896987e-06	KBTBD7	4	-	GO:0005488//binding	-	gi|21359972|ref|NP_115514.2|/0/kelch repeat and BTB domain-containing protein 7 [Homo sapiens]
6695	4841	1821	680	11.9135057240915	5.72145892181859	-1.05814303628645	Down	1.468236e-65	4.25812509442623e-64	SPOCK1	3	GO:0031012//extracellular matrix	GO:0046872//metal ion binding	GO:0009987//cellular process;GO:0023052//signaling;GO:0048731	gi|4759164|ref|NP_004589.1|/0/testican-1 precursor [Homo sapiens]
387119	7653	182	68	0.753189729466135	0.361917975179979	-1.05735056439567	Down	7.41732e-08	3.15280653820279e-07	CEP85L	2	-	-	-	gi|109715849|ref|NP_996804.2|/0/centrosomal protein of 85 kDa-like isoform b [Homo sapiens]//gi|109715852|ref|NP_001035940.1|/0/centrosomal protein of 85 kDa-like isoform a [Homo sapiens]//gi|295842380|ref|NP_001171506.1|/0/centrosomal protein of 85 kDa-like isoform c [Homo sapiens]
3763	2537	281	105	3.50792716345086	1.68578345037851	-1.05719956800212	Down	2.14338e-11	1.20491056816015e-10	KCNJ6	3	GO:0005887//integral to plasma membrane;GO:0043005//neuron projection;GO:0043025//neuronal cell body;GO:0043231//intracellular membrane-bounded organelle	GO:0005242//inward rectifier potassium channel activity;GO:0005488//binding	GO:0006575//cellular modified amino acid metabolic process;GO:0007267//cell-cell signaling;GO:0009628//response to abiotic stimulus;GO:0030001//metal ion transport;GO:0034220//ion transmembrane transport	gi|6981126|ref|NP_037324.1|/0/G protein-activated inward rectifier potassium channel 2 [Rattus norvegicus]
727936	1547	190	71	3.88980653773281	1.86939462287272	-1.05712725427358	Down	3.8443e-08	1.67759031327084e-07	GXYLT2	1	GO:0031224//intrinsic to membrane	GO:0008194//UDP-glycosyltransferase activity	GO:0006493//protein O-linked glycosylation	gi|122937187|ref|NP_001073862.1|/0/glucoside xylosyltransferase 2 precursor [Homo sapiens]
8793	3569	2041	765	18.1117815502117	8.73067539103089	-1.05276329490001	Down	1.124986e-72	3.54130379466192e-71	TNFRSF10D	4	GO:0031224//intrinsic to membrane	GO:0004872//receptor activity;GO:0005515//protein binding	GO:0006917//induction of apoptosis;GO:0007249//I-kappaB kinase/NF-kappaB cascade;GO:0009612//response to mechanical stimulus;GO:0043066//negative regulation of apoptotic process	gi|22547108|ref|NP_003831.2|/0/tumor necrosis factor receptor superfamily member 10D precursor [Homo sapiens]
80005	7555	6064	2274	25.4208131588866	12.2599569674448	-1.05205626472616	Down	6.08964e-212	5.41365935879397e-210	DOCK5	6	GO:0044424//intracellular part	GO:0019899//enzyme binding;GO:0030695//GTPase regulator activity;GO:0032561//guanyl ribonucleotide binding	-	gi|117553586|ref|NP_079216.4|/0/dedicator of cytokinesis protein 5 [Homo sapiens]
55137	4535	200	75	1.39674594414731	0.673623029392076	-1.05205626472615	Down	1.91014e-08	8.53771772107125e-08	FIGN	2	GO:0034399//nuclear periphery	GO:0005515//protein binding;GO:0016462//pyrophosphatase activity;GO:0032559	-	gi|148695049|gb|EDL26996.1|/0/fidgetin, isoform CRA_b [Mus musculus]
54629	5013	240	90	1.51627596809289	0.731270003182062	-1.05205626472615	Down	7.24632e-10	3.64189338409091e-09	FAM63B	1	-	-	-	gi|355778077|gb|EHH63113.1|/0/Protein FAM63B [Macaca fascicularis]
57713	8024	2419	908	9.54793960018494	4.60922472244949	-1.05066533213632	Down	1.587738e-85	5.85180686625e-84	SFMBT2	1	GO:0043231//intracellular membrane-bounded organelle	-	-	gi|10047311|dbj|BAB13443.1|/0/KIAA1617 protein [Homo sapiens]
10461	3632	253	95	2.20617214034573	1.06539516019765	-1.05015673181068	Down	2.6649e-10	1.39029035387791e-09	MERTK	2	GO:0000267//cell fraction;GO:0016021//integral to membrane;GO:0031513//nonmotile primary cilium	GO:0004713//protein tyrosine kinase activity;GO:0004871//signal transducer activity;GO:0032559	GO:0002376//immune system process;GO:0006464//cellular protein modification process;GO:0006897//endocytosis;GO:0007154//cell communication;GO:0007165//signal transduction;GO:0007599//hemostasis;GO:0050953//sensory perception of light stimulus	gi|119572481|gb|EAW52096.1|/0/c-mer proto-oncogene tyrosine kinase, isoform CRA_a [Homo sapiens]
1282	6549	15628	5872	75.5776052562479	36.5211135209587	-1.04922805278777	Down	0	0	COL4A1	4	-	-	-	gi|148536825|ref|NP_001836.2|/0/collagen alpha-1(IV) chain preproprotein [Homo sapiens]
22936	6063	1477	556	7.71538569961884	3.73525432666105	-1.04653180348859	Down	1.36864e-52	3.20696824370861e-51	ELL2	5	GO:0043231//intracellular membrane-bounded organelle;GO:0043234//protein complex	-	GO:0006354//DNA-dependent transcription, elongation	gi|155722987|ref|NP_036213.2|/0/RNA polymerase II elongation factor ELL2 [Homo sapiens]
57449	5273	579	218	3.47764708328652	1.68395963220909	-1.04625397865962	Down	1.357386e-21	1.35135147585819e-20	PLEKHG5	1	GO:0016021//integral to membrane;GO:0044444//cytoplasmic part	GO:0005035//death receptor activity;GO:0005088//Ras guanyl-nucleotide exchange factor activity;GO:0060089	GO:0006917//induction of apoptosis;GO:0007169//transmembrane receptor protein tyrosine kinase signaling pathway;GO:0007249//I-kappaB kinase/NF-kappaB cascade;GO:0007266//Rho protein signal transduction;GO:0009966//regulation of signal transduction;GO:0019221//cytokine-mediated signaling pathway	gi|111154084|ref|NP_941374.2|/0/pleckstrin homology domain-containing family G member 5 isoform b [Homo sapiens]//gi|221042762|dbj|BAH13058.1|/0/unnamed protein product [Homo sapiens]//gi|388240778|ref|NP_001252521.1|/0/pleckstrin homology domain-containing family G member 5 isoform d [Homo sapiens]//gi|388240780|ref|NP_001252522.1|/0/pleckstrin homology domain-containing family G member 5 isofor…
78990	3873	369	139	3.01747432755651	1.46184140088729	-1.0455546987842	Down	2.74594e-14	1.86124231954023e-13	OTUB2	3	-	GO:0005488//binding;GO:0008238//exopeptidase activity;GO:0019783//small conjugating protein-specific protease activity	GO:0016579//protein deubiquitination;GO:0019752//carboxylic acid metabolic process	gi|12962939|ref|NP_075601.1|/4.04789e-130/ubiquitin thioesterase OTUB2 [Homo sapiens]
3156	4589	4120	1552	28.4343871972512	13.7754759649331	-1.04553454533076	Down	3.32072e-143	1.97137105771812e-141	HMGCR	1	GO:0031090//organelle membrane;GO:0031224//intrinsic to membrane;GO:0042598;GO:0044439	GO:0000166//nucleotide binding;GO:0016616//oxidoreductase activity, acting on the CH-OH group of donors, NAD or NADP as acceptor;GO:0048037//cofactor binding	GO:0006694//steroid biosynthetic process;GO:0006720//isoprenoid metabolic process;GO:0006732//coenzyme metabolic process;GO:0007276//gamete generation;GO:0007632//visual behavior;GO:0008203//cholesterol metabolic process;GO:0043405//regulation of MAP kinase activity;GO:0045137//development of primary sexual characteristics	gi|158259245|dbj|BAF85581.1|/0/unnamed protein product [Homo sapiens]//gi|196049380|ref|NP_001124468.1|/0/3-hydroxy-3-methylglutaryl-Coenzyme A reductase isoform 2 [Homo sapiens]
57685	5274	236	89	1.41721777984746	0.687357752516958	-1.04392838384275	Down	1.27649e-09	6.27811637197665e-09	CACHD1	2	GO:0031224//intrinsic to membrane	-	GO:0070838//divalent metal ion transport	gi|158563905|sp|Q5VU97.2|CAHD1_HUMAN/0/RecName: Full=VWFA and cache domain-containing protein 1; Short=Cache domain-containing protein 1; Flags: Precursor
140828	4924	167	63	1.07414556973014	0.521141260797355	-1.04344313442144	Down	3.45026e-07	1.37753440893703e-06	LINC00261	3	-	-	-	-
9928	7293	1510	570	6.55745695435977	3.18347611833639	-1.04253349060765	Down	2.10016e-53	4.99380787096774e-52	KIF14	2	GO:0015630//microtubule cytoskeleton;GO:0043231//intracellular membrane-bounded organelle	GO:0003774//motor activity;GO:0032559	GO:0007017//microtubule-based process	gi|40788943|dbj|BAA05392.2|/0/KIAA0042 [Homo sapiens]
1302	6425	278	105	1.37036538067303	0.665654881495765	-1.0417143205047	Down	4.68812e-11	2.5797054718507e-10	COL11A2	1	GO:0005583//fibrillar collagen	GO:0005201//extracellular matrix structural constituent;GO:0005515//protein binding	GO:0009888//tissue development;GO:0030198//extracellular matrix organization;GO:0032501//multicellular organismal process;GO:0048731;GO:0048856//anatomical structure development;GO:0050954//sensory perception of mechanical stimulus	gi|254939712|ref|NP_001157243.1|/1.97944e-142/collagen alpha-2(XI) chain isoform 4 precursor [Homo sapiens]//gi|374095517|sp|P13942.5|COBA2_HUMAN/0/RecName: Full=Collagen alpha-2(XI) chain; Flags: Precursor//gi|397474332|ref|XP_003808636.1|/0/PREDICTED: collagen alpha-2(XI) chain-like isoform 2 [Pan paniscus]//gi|397474334|ref|XP_003808637.1|/0/PREDICTED: collagen alpha-2(XI) chain-like isoform 3…
2182	5351	6204	2347	36.7199053289262	17.8653320592383	-1.03939960996024	Down	1.31733e-212	1.18298908781726e-210	ACSL4	2	GO:0031224//intrinsic to membrane;GO:0031966//mitochondrial membrane;GO:0042598;GO:0044297//cell body;GO:0044439	GO:0015645//fatty acid ligase activity;GO:0032559	GO:0006631//fatty acid metabolic process;GO:0006641//triglyceride metabolic process;GO:0006869//lipid transport;GO:0007610//behavior;GO:0031667//response to nutrient levels;GO:0034097//response to cytokine stimulus;GO:0035336//long-chain fatty-acyl-CoA metabolic process;GO:0048609//multicellular organismal reproductive process;GO:0048856//anatomical structure development	gi|12669909|ref|NP_075266.1|/0/long-chain-fatty-acid--CoA ligase 4 isoform 2 [Homo sapiens]
83660	11650	906	343	2.46301460436803	1.19922631225696	-1.03832123932074	Down	1.639998e-32	2.36263881254072e-31	TLN2	2	GO:0005856//cytoskeleton;GO:0005924//cell-substrate adherens junction;GO:0031252//cell leading edge	GO:0005102//receptor binding;GO:0005198//structural molecule activity;GO:0008092//cytoskeletal protein binding	GO:0007010//cytoskeleton organization;GO:0034329//cell junction assembly	gi|156938343|ref|NP_055874.2|/0/talin-2 [Homo sapiens]
26115	11747	3066	1161	8.26627589966242	4.02567031452938	-1.03800849024052	Down	7.80238e-106	3.53022773861893e-104	TANC2	3	-	-	-	gi|157739945|ref|NP_079461.2|/0/protein TANC2 [Homo sapiens]
11101	2224	512	194	7.29121479908841	3.55303839945356	-1.03710592326018	Down	5.0818e-19	4.44619801186944e-18	ATE1	1	GO:0043231//intracellular membrane-bounded organelle	GO:0016747//transferase activity, transferring acyl groups other than amino-acyl groups;GO:0016755	GO:0006464//cellular protein modification process	gi|50345875|ref|NP_008972.2|/0/arginyl-tRNA--protein transferase 1 isoform 2 [Homo sapiens]//gi|50345877|ref|NP_001001976.1|/0/arginyl-tRNA--protein transferase 1 isoform 1 [Homo sapiens]
55690	4511	5280	2001	37.0702751977594	18.0678807567411	-1.03683552778738	Down	1.590524e-180	1.21284310706897e-178	PACS1	3	GO:0005798//Golgi-associated vesicle	GO:0005488//binding	GO:0000301//retrograde transport, vesicle recycling within Golgi;GO:0008104//protein localization;GO:0043393//regulation of protein binding;GO:0050688//regulation of defense response to virus	gi|30089916|ref|NP_060496.2|/0/phosphofurin acidic cluster sorting protein 1 [Homo sapiens]
10116	2583	569	216	6.97674058355959	3.40613846778321	-1.03441610559042	Down	6.91384e-21	6.66554460163488e-20	FEM1B	3	GO:0043231//intracellular membrane-bounded organelle	GO:0019787//small conjugating protein ligase activity;GO:0032813//tumor necrosis factor receptor superfamily binding	GO:0000077//DNA damage checkpoint;GO:0002070//epithelial cell maturation;GO:0006915//apoptotic process;GO:0012502//induction of programmed cell death;GO:0031396//regulation of protein ubiquitination;GO:0060740//prostate gland epithelium morphogenesis	gi|7657265|ref|NP_056137.1|/0/protein fem-1 homolog B [Homo sapiens]
7586	5494	1008	383	5.81080888201831	2.83950784581057	-1.03309810702227	Down	1.04683e-35	1.64471310213144e-34	ZKSCAN1	1	GO:0043231//intracellular membrane-bounded organelle	GO:0001071//nucleic acid binding transcription factor activity;GO:0003676//nucleic acid binding;GO:0046914//transition metal ion binding	GO:0006351//transcription, DNA-dependent	gi|18490219|gb|AAH22378.1|/0/Zinc finger with KRAB and SCAN domains 1 [Homo sapiens]
4773	7530	250	95	1.05150113823175	0.513879843537567	-1.03294744177845	Down	5.81188e-10	2.94691800171969e-09	NFATC2	1	GO:0005856//cytoskeleton;GO:0016020//membrane;GO:0031981//nuclear lumen;GO:0044444//cytoplasmic part	GO:0001071//nucleic acid binding transcription factor activity;GO:0003676//nucleic acid binding;GO:0043565//sequence-specific DNA binding	GO:0006351//transcription, DNA-dependent;GO:0006357//regulation of transcription from RNA polymerase II promoter;GO:0030888//regulation of B cell proliferation;GO:0032501//multicellular organismal process;GO:0033554//cellular response to stress;GO:0042221//response to chemical stimulus;GO:0050851//antigen receptor-mediated signaling pathway	gi|209862843|ref|NP_001129493.1|/0/nuclear factor of activated T-cells, cytoplasmic 2 isoform D [Homo sapiens]//gi|27886539|ref|NP_036472.2|/0/nuclear factor of activated T-cells, cytoplasmic 2 isoform B [Homo sapiens]//gi|27886541|ref|NP_775114.1|/0/nuclear factor of activated T-cells, cytoplasmic 2 isoform C [Homo sapiens]//gi|385137140|ref|NP_001245221.1|/0/nuclear factor of activated T-cells,…
4649	8722	689	262	2.50188794328815	1.22353997528515	-1.03195593661416	Down	7.11878e-25	8.00116499237611e-24	MYO9A	3	GO:0016459//myosin complex;GO:0031224//intrinsic to membrane;GO:0044444//cytoplasmic part	GO:0008047//enzyme activator activity;GO:0008092//cytoskeletal protein binding;GO:0017111//nucleoside-triphosphatase activity;GO:0032559;GO:0043169//cation binding	GO:0009966//regulation of signal transduction;GO:0035556//intracellular signal transduction;GO:0050953//sensory perception of light stimulus	gi|156119615|ref|NP_008832.2|/0/unconventional myosin-IXa [Homo sapiens]
84632	3997	2440	929	19.3339411688362	9.4670467089459	-1.03014941151491	Down	1.372584e-83	4.8759806313253e-82	AFAP1L2	1	GO:0044424//intracellular part	GO:0019904//protein domain specific binding;GO:0030295//protein kinase activator activity	GO:0000278//mitotic cell cycle;GO:0001819//positive regulation of cytokine production;GO:0006355//regulation of transcription, DNA-dependent;GO:0006952//defense response;GO:0009967//positive regulation of signal transduction;GO:0045860//positive regulation of protein kinase activity	gi|24308338|ref|NP_115939.1|/0/actin filament-associated protein 1-like 2 isoform 2 [Homo sapiens]//gi|50897850|ref|NP_001001936.1|/0/actin filament-associated protein 1-like 2 isoform 1 [Homo sapiens]
8835	2888	1151	439	12.6224264682669	6.1915628458479	-1.02761375404418	Down	3.35768e-40	5.99401784863774e-39	SOCS2	1	GO:0044424//intracellular part	GO:0005126//cytokine receptor binding;GO:0030674//protein binding, bridging	GO:0007169//transmembrane receptor protein tyrosine kinase signaling pathway;GO:0007243//intracellular protein kinase cascade;GO:0016049//cell growth;GO:0032502//developmental process;GO:0043066//negative regulation of apoptotic process;GO:0043627//response to estrogen stimulus	gi|4507263|ref|NP_003868.1|/2.38365e-112/suppressor of cytokine signaling 2 [Homo sapiens]//gi|4507263|ref|NP_003868.1|/2.45541e-112/suppressor of cytokine signaling 2 [Homo sapiens]//gi|4507263|ref|NP_003868.1|/2.49236e-112/suppressor of cytokine signaling 2 [Homo sapiens]//gi|4507263|ref|NP_003868.1|/2.61328e-112/suppressor of cytokine signaling 2 [Homo sapiens]//gi|4507263|ref|NP_003868.1|/2.7…
145773	3468	650	248	5.93606957448131	2.91276566204029	-1.02711836297625	Down	2.18398e-23	2.30805198207885e-22	FAM81A	2	-	-	-	gi|148613880|ref|NP_689663.2|/0/protein FAM81A [Homo sapiens]
6926	4814	2348	897	15.4474472658398	7.58960740381908	-1.02527128363811	Down	6.7055e-80	2.29897287790698e-78	TBX3	3	GO:0043231//intracellular membrane-bounded organelle	GO:0001071//nucleic acid binding transcription factor activity;GO:0003677//DNA binding	GO:0000578//embryonic axis specification;GO:0001944//vasculature development;GO:0003002//regionalization;GO:0003143//embryonic heart tube morphogenesis;GO:0006355//regulation of transcription, DNA-dependent;GO:0007568//aging;GO:0008283//cell proliferation;GO:0030900//forebrain development;GO:0032274//gonadotropin secretion;GO:0035051//cardiocyte differentiation;GO:0035115//embryonic forelimb morp…	gi|47419905|ref|NP_005987.3|/0/T-box transcription factor TBX3 isoform 1 [Homo sapiens]//gi|47419907|ref|NP_057653.3|/0/T-box transcription factor TBX3 isoform 2 [Homo sapiens]
3655	5810	2846	1089	15.5139889588564	7.63457211084601	-1.02295047325689	Down	4.18568e-96	1.68676229794989e-94	ITGA6	1	GO:0005887//integral to plasma membrane	GO:0004871//signal transducer activity;GO:0005488//binding	GO:0002376//immune system process;GO:0006915//apoptotic process;GO:0007044//cell-substrate junction assembly;GO:0007166//cell surface receptor signaling pathway;GO:0007599//hemostasis	gi|119395740|ref|NP_001073286.1|/0/integrin alpha-6 isoform a precursor [Homo sapiens]//gi|119395742|ref|NP_000201.2|/0/integrin alpha-6 isoform b precursor [Homo sapiens]
7587	7058	1408	539	6.31808865276632	3.1105706172475	-1.0223089213321	Down	2.11408e-48	4.52786795157385e-47	ZNF37A	2	GO:0005622//intracellular	GO:0005488//binding	GO:0006351//transcription, DNA-dependent	gi|119606290|gb|EAW85884.1|/0/zinc finger protein 37a (KOX 21), isoform CRA_a [Homo sapiens]
26108	1260	141	54	3.54415969363427	1.74564596473889	-1.02168261568264	Down	4.23646e-06	1.50435997310317e-05	PYGO1	1	GO:0043231//intracellular membrane-bounded organelle	GO:0046914//transition metal ion binding	GO:0007166//cell surface receptor signaling pathway;GO:0048513//organ development	gi|30911103|ref|NP_056432.1|/0/pygopus homolog 1 [Homo sapiens]
283755	4292	188	72	1.38727592854277	0.683291057959306	-1.02168261568264	Down	1.044338e-07	4.37909067504148e-07	HERC2P3	1	GO:0000152//nuclear ubiquitin ligase complex;GO:0019866//organelle inner membrane	GO:0005506//iron ion binding;GO:0019787//small conjugating protein ligase activity;GO:0030695//GTPase regulator activity	GO:0006259//DNA metabolic process;GO:0007088//regulation of mitosis;GO:0015031//protein transport;GO:0016567//protein ubiquitination;GO:0048232//male gamete generation	gi|6683697|dbj|BAA20846.2|/0/KIAA0393 protein [Homo sapiens]
83648	4093	274	105	2.12018390268508	1.04491390510879	-1.02080533074172	Down	1.313526e-10	6.98664716355983e-10	FAM167A	2	-	-	-	gi|119586020|gb|EAW65616.1|/5.10987e-115/chromosome 8 open reading frame 13 [Homo sapiens]
92255	3237	167	64	1.63394896056572	0.805323233655674	-1.02072305792136	Down	5.5477e-07	2.16749913206714e-06	LMBRD2	1	GO:0031224//intrinsic to membrane	-	-	gi|56790897|ref|NP_001007528.1|/0/LMBR1 domain-containing protein 2 [Homo sapiens]
347344	7859	227	87	0.91479394864024	0.450904861740674	-1.0206237568895	Down	5.09468e-09	2.40410733208856e-08	ZNF81	3	GO:0043231//intracellular membrane-bounded organelle	GO:0001071//nucleic acid binding transcription factor activity;GO:0003676//nucleic acid binding;GO:0046914//transition metal ion binding	GO:0006351//transcription, DNA-dependent	gi|148727251|ref|NP_009068.2|/0/zinc finger protein 81 [Homo sapiens]
55672	4568	2037	782	14.1230874552477	6.97290281011435	-1.01822423310585	Down	8.461e-69	2.53700933898305e-67	NBPF1	3	GO:0044424//intracellular part	-	-	gi|92110019|ref|NP_060410.2|/0/neuroblastoma breakpoint family member 1 [Homo sapiens]
7975	3350	8041	3087	76.0203683743127	37.5339936836246	-1.01818821242192	Down	6.3264e-266	6.9515740621118e-264	MAFK	3	GO:0031981//nuclear lumen	GO:0001071//nucleic acid binding transcription factor activity;GO:0003677//DNA binding	GO:0006351//transcription, DNA-dependent;GO:0007599//hemostasis;GO:0048731	gi|158931996|gb|AAI52388.1|/1.02253e-65/V-maf musculoaponeurotic fibrosarcoma oncogene homolog K (avian) [Homo sapiens]
55612	5167	3682	1415	22.5688815544795	11.1545211797553	-1.01670633907798	Down	1.45117e-122	7.3771978362069e-121	FERMT1	4	GO:0001726//ruffle;GO:0005884//actin filament;GO:0005924//cell-substrate adherens junction;GO:0044444//cytoplasmic part	-	GO:0008283//cell proliferation;GO:0016477//cell migration;GO:0030010//establishment of cell polarity	gi|116686114|ref|NP_060141.3|/0/fermitin family homolog 1 [Homo sapiens]
9475	6401	2642	1016	13.0722306103911	6.46515341416602	-1.01574882992197	Down	2.40272e-88	9.12157071244635e-87	ROCK2	3	GO:0000922//spindle pole;GO:0005815//microtubule organizing center;GO:0016020//membrane	GO:0004672//protein kinase activity;GO:0032559;GO:0043169//cation binding	GO:0006464//cellular protein modification process;GO:0006935//chemotaxis;GO:0007010//cytoskeleton organization;GO:0007265//Ras protein signal transduction;GO:0010638//positive regulation of organelle organization;GO:0014020	gi|41872583|ref|NP_004841.2|/0/rho-associated protein kinase 2 [Homo sapiens]
118611	3097	91	35	0.930603971521526	0.460319945496749	-1.01553038870104	Down	0.000247494	0.000704491770555109	C10orf90	2	-	-	-	gi|52145312|ref|NP_001004298.2|/0/centrosomal protein C10orf90 [Homo sapiens]
54878	4096	865	334	6.68837899298397	3.3213869348629	-1.00987079549735	Down	8.28446e-30	1.10361733328313e-28	DPP8	2	GO:0031981//nuclear lumen	GO:0008238//exopeptidase activity	GO:0002376//immune system process;GO:0019538//protein metabolic process	gi|119598133|gb|EAW77727.1|/0/dipeptidyl-peptidase 8, isoform CRA_b [Homo sapiens]//gi|18450278|ref|NP_060213.2|/0/dipeptidyl peptidase 8 isoform 2 [Homo sapiens]//gi|37577089|ref|NP_932064.1|/0/dipeptidyl peptidase 8 isoform 3 [Homo sapiens]//gi|37577091|ref|NP_932065.1|/0/dipeptidyl peptidase 8 isoform 4 [Homo sapiens]
3678	4267	5871	2267	43.5766812886489	21.6402279622229	-1.00984063105448	Down	3.86462e-192	3.17995313581395e-190	ITGA5	2	GO:0001726//ruffle;GO:0005624//membrane fraction;GO:0005887//integral to plasma membrane;GO:0005924//cell-substrate adherens junction;GO:0009986//cell surface;GO:0043234//protein complex	GO:0004871//signal transducer activity;GO:0005172//vascular endothelial growth factor receptor binding	GO:0001934//positive regulation of protein phosphorylation;GO:0002376//immune system process;GO:0006935//chemotaxis;GO:0007166//cell surface receptor signaling pathway;GO:0007599//hemostasis;GO:0007611//learning or memory;GO:0009967//positive regulation of signal transduction;GO:0016337//cell-cell adhesion;GO:0034329//cell junction assembly;GO:0044319//wound healing, spreading of cells;GO:0048646…	gi|119617187|gb|EAW96781.1|/0/integrin, alpha 5 (fibronectin receptor, alpha polypeptide), isoform CRA_b [Homo sapiens]
55521	4456	119	46	0.845797688451816	0.420480251829686	-1.00827457269824	Down	2.97512e-05	9.56960871272727e-05	TRIM36	1	GO:0030141//secretory granule;GO:0031982//vesicle;GO:0043232	GO:0003824//catalytic activity;GO:0046914//transition metal ion binding	GO:0007338//single fertilization	gi|62865606|ref|NP_061170.2|/0/E3 ubiquitin-protein ligase TRIM36 isoform 1 [Homo sapiens]//gi|62865608|ref|NP_001017398.1|/8.47863e-27/E3 ubiquitin-protein ligase TRIM36 isoform 3 [Homo sapiens]//gi|62865610|ref|NP_001017397.1|/1.13922e-28/E3 ubiquitin-protein ligase TRIM36 isoform 2 [Homo sapiens]
3929	1894	530	205	8.86258900225784	4.40866237134867	-1.00738721539243	Down	8.4841e-19	7.34665751835536e-18	LBP	3	GO:0044421//extracellular region part	GO:0005515//protein binding;GO:0051635//bacterial cell surface binding	GO:0001818//negative regulation of cytokine production;GO:0001819//positive regulation of cytokine production;GO:0002275;GO:0002523//leukocyte migration involved in inflammatory response;GO:0002526//acute inflammatory response;GO:0002690//positive regulation of leukocyte chemotaxis;GO:0002696//positive regulation of leukocyte activation;GO:0002699//positive regulation of immune effector process;G…	gi|547198|gb|AAB31143.1|/0/LPS-binding protein, LBP=lipopolysaccharide-binding protein [human, liver, Peptide, 481 aa]
493	8931	1141	442	4.04622724191238	2.01583570891731	-1.00519928234456	Down	1.628322e-38	2.78594240831721e-37	ATP2B4	4	GO:0016021//integral to membrane	GO:0005515//protein binding;GO:0019829//cation-transporting ATPase activity;GO:0032559;GO:0043169//cation binding;GO:0046873//metal ion transmembrane transporter activity	GO:0001775//cell activation;GO:0006816//calcium ion transport;GO:0007599//hemostasis;GO:0009206;GO:0048856//anatomical structure development	gi|48255957|ref|NP_001675.3|/0/plasma membrane calcium-transporting ATPase 4 isoform 4b [Homo sapiens]//gi|48255959|ref|NP_001001396.1|/0/plasma membrane calcium-transporting ATPase 4 isoform 4a [Homo sapiens]
4217	5215	289	112	1.75512577717031	0.874775606491079	-1.00458952589039	Down	7.30698e-11	3.96892180472828e-10	MAP3K5	3	-	GO:0004702//receptor signaling protein serine/threonine kinase activity;GO:0016505//apoptotic protease activator activity;GO:0019902//phosphatase binding;GO:0032559;GO:0042802//identical protein binding;GO:0046872//metal ion binding	GO:0000187//activation of MAPK activity;GO:0006917//induction of apoptosis;GO:0051345//positive regulation of hydrolase activity;GO:0051704	gi|62087766|dbj|BAD92330.1|/0/mitogen-activated protein kinase kinase kinase 5 variant [Homo sapiens]
